# Supplementary material for: An integrated knowledge synthesis of regional ambient monitoring in Canada's oil sands
Source: PubMed Central journal article supplement — Integr Environ Assess Manag. 2021 Aug 27;18(2):428–41. doi: 10.1002/ieam.4505 (PMC9291055; doi:10.1002/ieam.4505), 2021-08-27
Supplement: IEAM-18-428-s001.pdf [file IEAM-18-428-s001.pdf]

# An integrated knowledge synthesis of regional ambient monitoring in Canada’s oil sands

## Supplemental Information: Appendix 1

### Table of Contents

|                                                   |    |
|---------------------------------------------------|----|
| Pressure .....                                    | 3  |
| Air emissions sources.....                        | 3  |
| Geological setting .....                          | 10 |
| Global background.....                            | 10 |
| Infrastructure.....                               | 11 |
| Landscape disturbance .....                       | 12 |
| Natural disturbance .....                         | 16 |
| Non-oil sands landscape disturbance .....         | 16 |
| Oil sands production.....                         | 17 |
| Operational spills and leaks .....                | 18 |
| Urban development.....                            | 18 |
| Stressor.....                                     | 20 |
| Contaminants.....                                 | 20 |
| Elimination of streams, wetlands, and lakes ..... | 37 |
| Increased human access .....                      | 37 |
| Land deformation .....                            | 37 |
| Noise.....                                        | 37 |
| Surface water diversions and withdrawals .....    | 37 |
| Vegetation and soil removal.....                  | 38 |
| Wildfire .....                                    | 41 |
| Pathway .....                                     | 43 |

|                                                   |    |
|---------------------------------------------------|----|
| Altered disturbance regime .....                  | 43 |
| Ambient air quality .....                         | 43 |
| Atmospheric deposition.....                       | 50 |
| Behaviour change .....                            | 57 |
| Chemical and physical soil properties.....        | 57 |
| Connectivity and barriers.....                    | 58 |
| Habitat loss and change.....                      | 60 |
| Invasive species .....                            | 61 |
| Resource availability .....                       | 62 |
| Surface water and sediment quality .....          | 62 |
| Surface water levels, flow & supply.....          | 65 |
| Transport and transformation .....                | 66 |
| Wildlife harvesting .....                         | 70 |
| Response.....                                     | 70 |
| Distributions .....                               | 70 |
| Diversity .....                                   | 73 |
| Health .....                                      | 75 |
| Odours .....                                      | 77 |
| Valued component .....                            | 78 |
| Ecosystem structure and function .....            | 78 |
| Traditional resources and cultural practices..... | 82 |

## Pressure

### Air emissions sources

- Adamache, Lori, Spink, David. 2012. Cumulative Effects: Concerns of Fort McKay regarding the impacts of emissions to air from industrial development. Prepared for the Fort McKay Sustainability Department. September 2012.
- Adams C, McLinden CA, Shephard MW, Dickson N, Dammers E, Chen J, Makar P, Cady-Pereira KE, Tam N, Kharol SK, et al. 2019. Satellite-derived emissions of carbon monoxide, ammonia, and nitrogen dioxide from the 2016 Horse River wildfire in the Fort McMurray area. *Atmos Chem Phys*. 19(4):2577–2599. doi:10.5194/acp-19-2577-2019.
- Ahad JME, Jautzy JJ, Cumming BF, Das B, Laird KR, Sanei H. 2015. Sources of polycyclic aromatic hydrocarbons (PAHs) to northwestern Saskatchewan lakes east of the Athabasca oil sands. *Org Geochem*. 80:35–45. doi:10.1016/j.orggeochem.2015.01.001.
- Akingunola A, Makar PA, Zhang J, Darlington A, Li SM, Gordon M, Moran MD, Zheng Q. 2018. A chemical transport model study of plume-rise and particle size distribution for the Athabasca oil sands. *Atmos Chem Phys*. 18(12):8667–8688. doi:10.5194/acp-18-8667-2018.
- Baray S, Darlington A, Gordon M, Hayden KL, Leithead A, Li S-M, Liu PSK, Mittermeier RL, Moussa SG, O'Brien J, Staebler R, Wolde M, Worthy D and McLaren R. 2018. Quantification of methane sources in the Athabasca Oil Sands Region of Alberta by aircraft mass balance. *Atmos Chem Phys*. 18(10):7361–7378. doi:10.5194/acp-18-7361-2018.
- Bari MA and Kindzierski WB, 2018. Ambient volatile organic compounds (VOCs) in communities of the Athabasca oil sands region: Sources and screening health risk assessment. *Environ Pollut* 235: 602-614. <https://doi.org/10.1016/j.envpol.2017.12.065>
- Bari MA, Kindzierski WB. 2015. Fifteen-year trends in criteria air pollutants in oil sands communities of Alberta, Canada. *Environ Int* 74:200–208. <https://doi.org/10.1016/j.envint.2014.10.009>
- Bari MA, Kindzierski WB. 2016. Evaluation of air quality indicators in Alberta, Canada—An international perspective. *Environ Int* 92: 119-129. <http://dx.doi.org/10.1016/j.envint.2016.03.021>
- Bari MA, Kindzierski WB. 2017. Ambient fine particulate matter (PM<sub>2.5</sub>) in Canadian oil sands communities: Levels, sources and potential human health risk. *Sci Total Environ*. 595:828–838. doi:10.1016/j.scitotenv.2017.04.023.
- Bartels SF, Gendreau-Berthiaume B, Macdonald SE. 2019. The impact of atmospheric acid deposition on tree growth and forest understory vegetation in the Athabasca Oil Sands Region. *Sci Total Environ*. 696:133877. doi:10.1016/j.scitotenv.2019.133877.
- Berger RG, Aslund MW, Sanders G, Charlebois M, Knopper LD, Bresee KE. 2016. A multiple lines of evidence approach for the ecological risk assessment of an accidental bitumen release from a steam assisted gravity drainage (SAGD) well in the Athabasca oil sands region. *Sci Total Environ*. 542:495–504. doi:10.1016/j.scitotenv.2015.10.050.
- Boutin C, Carpenter DJ. 2017. Assessment of wetland/upland vegetation communities and evaluation of soil-plant contamination by polycyclic aromatic hydrocarbons and trace metals in regions near oil sands mining in Alberta. *Sci Total Environ*. 576:829-839. doi:10.1016/j.scitotenv.2016.10.062.

- Brook JR, Cober SG, Freemark M, Harner T, Li SM, Liggio J, Makar P, Pauli B. 2019. Advances in science and applications of air pollution monitoring: A case study on oil sands monitoring targeting ecosystem protection. *J Air Waste Manag Assoc.* 69(6):661–709. doi:10.1080/10962247.2019.1607689.
- Bytnerowicz A, Hsu YM, Percy K, Legge A, Fenn ME, Schilling S, Frączek W, Alexander D. 2016. Ground-level air pollution changes during a boreal wildland mega-fire. *Sci Total Environ.* 572:755–769. doi:10.1016/j.scitotenv.2016.07.052
- Charpentier AD, Bergerson JA, MacLean HL. 2009. Understanding the Canadian oil sands industry's greenhouse gas emissions. *Environ Res Lett.* 4(1). doi:10.1088/1748-9326/4/1/014005.
- Cheng Y, Li SM, Liggio J, Gordon M, Darlington A, Zheng Q, Moran M, Liu P, and Wolde M, 2019. Top-Down Determination of Black Carbon Emissions from Oil Sand Facilities in Alberta, Canada Using Aircraft Measurements. *Environ Sci Technol.* 54(1):412–418. doi:10.1021/acs.est.9b05522
- Chibwe L, Manzano CA, Muir D, Atkinson B, Kirk JL, Marvin CH, Wang X, Teixeira C, Shang D, Harner T, et al. 2019. Deposition and Source Identification of Nitrogen Heterocyclic Polycyclic Aromatic Compounds in Snow, Sediment, and Air Samples from the Athabasca Oil Sands Region. *Environ Sci Technol.* 53(6):2981–2989. doi:10.1021/acs.est.8b06175.
- Cho S, Dinwoodie G, Fu Y, Abboud S, Turchenek L. 2019. An assessment of long-term soil acidification trends in Alberta, Canada. *Ecol Indic.* 98(August 2018):712–722. doi:10.1016/j.ecolind.2018.11.020.
- Cho S, Morris R, McEachern P, Shah T, Johnson J and Nopmongcol U. 2012. Emission sources sensitivity study for ground-level ozone and PM<sub>2.5</sub> due to oil sands development using air quality modelling system: Part II-Source apportionment modelling. *Atmos Environ* 55: 542–556. doi:10.1016/j.atmosenv.2012.02.025
- Cruz-Martinez L, Fernie KJ, Soos C, Harner T, Getachew F, Smits JEG. 2015. Detoxification, endocrine, and immune responses of tree swallow nestlings naturally exposed to air contaminants from the Alberta oil sands. *Sci Total Environ.* 502:8-15. doi:10.1016/j.scitotenv.2014.09.008.
- Dann, Tom. 2013. Integration of odour data for the Human Exposure Monitoring Program (HEMP). Prepared for the Wood Buffalo Environmental Association.
- Dolgova S, Popp BN, Courtoreille K, Espie RHM, Maclean B, McMaster M, Straka JR, Tetreault GR, Wilkie S, Hebert CE. 2018. Spatial trends in a biomagnifying contaminant: Application of amino acid compound-specific stable nitrogen isotope analysis to the interpretation of bird mercury levels. *Environ Toxicol Chem.* 37(5):1466-1475. doi:10.1002/etc.4113.
- Eccles KM, Thomas PJ, Chan HM. 2020. Relationships between mercury concentrations in fur and stomach contents of river otter (*Lontra canadensis*) and mink (*Neovison vison*) in Northern Alberta Canada and their applications as proxies for environmental factors determining mercury bioavailability. *Environ Res.* 181:108961. doi:10.1016/j.envres.2019.108961.
- Englander JG, Brandt AR, Elgowainy A, Cai H, Han J, Yeh S, Wang MQ. 2015. Oil sands energy intensity assessment using facility-level data. *Energy & Fuels.* 29(8):5204–5212. DOI: 10.1021/acs.energyfuels.5b00175
- Evans MS, Talbot A. 2012. Investigations of mercury concentrations in walleye and other fish in the Athabasca River ecosystem with increasing oil sands developments. *J Environ Monit.* 14(7):1989–2003. doi:10.1039/c2em30132f.
- Fenn ME, Bytnerowicz A, Schilling SL, Ross CS. 2015. Atmospheric deposition of nitrogen, sulfur and base cations in jack pine stands in the Athabasca Oil Sands Region, Alberta, Canada. *Environ Pollut.* 196:497–510. doi:10.1016/j.envpol.2014.08.023
- Fernie KJ, Marteinson SC, Chen D, Eng A, Harner T, Smits JEG, Soos C. 2018. Elevated exposure, uptake and accumulation of polycyclic aromatic hydrocarbons by nestling tree swallows (*Tachycineta bicolor*) through multiple exposure routes in active mining-related areas of the Athabasca oil sands region. *Sci Total Environ.* 624:250-261. doi:10.1016/j.scitotenv.2017.12.123.

Fernie KJ, Marteinson SC, Chen D, Palace V, Peters L, Soos C, Smits JEG. 2019. Changes in thyroid function of nestling tree swallows (*Tachycineta bicolor*) in relation to polycyclic aromatic compounds and other environmental stressors in the Athabasca Oil Sands Region. *Environ Res.* 169(November 2018):464–475. doi:10.1016/j.envres.2018.11.031.

Fernie KJ, Marteinson SC, Soos C, Chen D, Cruz-Martinez L, Smits JEG. 2018. Reproductive and developmental changes in tree swallows (*Tachycineta bicolor*) are influenced by multiple stressors, including polycyclic aromatic compounds, in the Athabasca Oil Sands. *Environ Pollut.* 238:931-941. doi:10.1016/j.envpol.2018.03.074.

Fraser A, Dastoor A, Ryjkov A. 2018. How important is biomass burning in Canada to mercury contamination? *Atmos Chem Phys.* 18(10):7263–7286. doi:10.5194/acp-18-7263-2018.

Galarneau E, Hollebone BP, Yang Z, Schuster J. 2014. Preliminary measurement-based estimates of PAH emissions from oil sands tailings ponds. *Atmos Environ.* 97:332–335. doi:10.1016/j.atmosenv.2014.08.038

Godwin CM, Smits JEG, Barclay RMR. 2016. Metals and metalloids in nestling tree swallows and their dietary items near oilsands mine operations in Northern Alberta. *Sci Total Environ.* 562:714-723. doi:10.1016/j.scitotenv.2016.04.069.

Golzadeh N, Barst BD, Basu N, Baker JM, Auger JC, McKinney MA. 2020. Evaluating the concentrations of total mercury, methylmercury, selenium, and selenium:mercury molar ratios in traditional foods of the Bigstone Cree in Alberta, Canada. *Chemosphere.* 250:126285. doi:10.1016/j.chemosphere.2020.126285.

Gopalapillai Y, Kirk JL, Landis MS, Muir DCG, Cooke CA, Gleason A, Ho A, Kelly E, Schindler D, Wang X, Lawson G. 2019. Source Analysis of Pollutant Elements in Winter Air Deposition in the Athabasca Oil Sands Region: A Temporal and Spatial Study. *ACS Earth Space Chem.* 2019, 3, 8, 1656–1668. doi:10.1021/acsearthspacechem.9b00150

Gordon M, Li SM, Staebler R, Darlington A, Hayden K, O'Brien J, Wolde M. 2015. Determining air pollutant emission rates based on mass balance using airborne measurement data over the Alberta oil sands operations. *Atmos Meas Tech.* 8(9):3745–3765. doi:10.5194/amt-8-3745-2015

Gordon M, Makar PA, Staebler RM, Zhang J, Akingunola A, Gong W, Li SM. 2018. A comparison of plume rise algorithms to stack plume measurements in the Athabasca oil sands. *Atmos Chem Phys.* 18(19):14695–14714. doi:10.5194/acp-18-14695-2018.

Graney JR, Edgerton ES, Landis MS. 2019. Using Pb isotope ratios of particulate matter and epiphytic lichens from the Athabasca Oil Sands Region in Alberta, Canada to quantify local, regional, and global Pb source contributions. *Sci Total Environ.* 654:1293–1304. doi:10.1016/j.scitotenv.2018.11.047.

Graney JR, Landis MS, Puckett KJ, Studabaker WB, Edgerton ES, Legge AH, Percy KE. 2017. Differential accumulation of PAHs, elements, and Pb isotopes by five lichen species from the Athabasca Oil Sands Region in Alberta, Canada. *Chemosphere.* 184:700-710. doi:10.1016/j.chemosphere.2017.06.036.

Harner T, Rauert C, Muir D, Schuster JK, Hsu YM, Zhang L, Marson G, Watson JG, Ahad J, Cho S, et al. 2018. Air synthesis review: Polycyclic aromatic compounds in the oil sands region. *Environ Rev.* 26(4):430–468. doi:10.1139/er-2018-0039

Hebert CE, Campbell D, Kindopp R, MacMillan S, Martin P, Neugebauer E, Patterson L, Shatford J. 2013. Mercury trends in colonial waterbird eggs downstream of the oil sands region of Alberta, Canada. *Environ Sci Technol.* 47(20):11785-11792. doi:10.1021/es402542w.

Hebert CE, Weseloh DVC, Macmillan S, Campbell D, Nordstrom W. 2011. Metals and polycyclic aromatic hydrocarbons in colonial waterbird eggs from Lake Athabasca and the Peace-Athabasca Delta, Canada. *Environ Toxicol Chem.* 30(5):1178-1183. doi:10.1002/etc.489.

Howell SG, Clarke AD, Freitag S, McNaughton CS, Kapustin V, Brekovskikh V, Jimenez JL, Cubison MJ. 2014. An airborne assessment of atmospheric particulate emissions from the processing of Athabasca oil sands. *Atmos Chem Phys.* 14(10):5073–5087. doi:10.5194/acp-14-5073-2014

- Hsu YM, Clair TA. 2015. Measurement of fine particulate matter water-soluble inorganic species and precursor gases in the Alberta oil sands region using an improved semicontinuous monitor. *J Air Waste Manag Assoc.* 65(4):423–435. doi:10.1080/10962247.2014.1001088.
- Hsu YM, Harner T, Li H, Fellin P. 2015. PAH Measurements in Air in the Athabasca Oil Sands Region. *Environ Sci Technol.* 49(9):5584–5592. doi:10.1021/acs.est.5b00178
- Jariyasopit N, Zhang Y, Martin JW, Harner T. 2018. Comparison of polycyclic aromatic compounds in air measured by conventional passive air samplers and passive dry deposition samplers and contributions from petcoke and oil sands ore. *Atmos Chem Phys.* 18(12):9161–9171. doi:10.5194/acp-18-9161-2018.
- Jautzy J, Ahad JME, Gobeil C, Savard MM. 2013. Century-long source apportionment of PAHs in athabasca oil sands region lakes using diagnostic ratios and compound-specific carbon isotope signatures. *Environ Sci Technol.* 47(12):6155–6163. doi:10.1021/es400642e.
- Jautzy JJ, Ahad JM, Gobeil C, Smirnoff A, Barst BD, Savard MM. 2015. Isotopic evidence for oil sands petroleum coke in the Peace-Athabasca Delta. *Environ Sci Technol.* 49(20):12062–12070.
- Johnson MR, Crosland BM, McEwen JD, Hager DB, Armitage JR, Karimi-Golpayegani M, Picard DJ. 2016. Estimating fugitive methane emissions from oil sands mining using extractive core samples. *Atmos Environ.* 144(July 2014):111–123. doi:10.1016/j.atmosenv.2016.08.073.
- Kirk JL, Muir DCG, Gleason A, Wang X, Lawson G, Frank RA, Lehnerr I, Wrona F. 2014. Atmospheric deposition of mercury and methylmercury to landscapes and waterbodies of the athabasca oil sands region. *Environ Sci Technol.* 48(13):7374–7383. doi:10.1021/es500986r.
- Landis MS, Edgerton ES, White EM, Wentworth GR, Sullivan AP, Dillner AM. 2018. The impact of the 2016 Fort McMurray Horse River Wildfire on ambient air pollution levels in the Athabasca Oil Sands Region, Alberta, Canada. *Sci Total Environ.* 618:1665–1676. doi:10.1016/j.scitotenv.2017.10.008
- Landis MS, Pancras JP, Graney JR, White EM, Edgerton ES, Legge A, Percy KE. 2017. Source apportionment of ambient fine and coarse particulate matter at the Fort McKay community site , in the Athabasca Oil Sands Region , Alberta, Canada. *Sci Total Environ.* 584–585:105–117. doi:10.1016/j.scitotenv.2017.01.110
- Landis MS, Studabaker WB, Pancras JP, Graney JR, White EM, Edgerton ES. 2019. Source apportionment of ambient fine and coarse particulate matter polycyclic aromatic hydrocarbons at the Bertha Ganter-Fort McKay community site in the Oil Sands Region of Alberta, Canada. *Sci Total Environ.* 666:540–558. doi:10.1016/j.scitotenv.2019.02.126.
- Landis MS, Studabaker WB, Patrick Pancras J, Graney JR, Puckett K, White EM, Edgerton ES. 2019. Source apportionment of an epiphytic lichen biomonitor to elucidate the sources and spatial distribution of polycyclic aromatic hydrocarbons in the Athabasca Oil Sands Region, Alberta, Canada. *Sci Total Environ.* 654:1241–1257. doi:10.1016/j.scitotenv.2018.11.131.
- Laxton DL, Watmough SA, Aherne J, Straker J. 2010. An assessment of nitrogen saturation in *Pinus banksiana* plots in the Athabasca Oil Sands Region, Alberta. 1.:171-180. doi:10.4081/jlimnol.2010.s1.171.
- Li K, Liggio J, Lee P, Han C, Liu Q. 2019. Secondary organic aerosol formation from  $\alpha$ -pinene, alkanes, and oil-sands-related precursors in a new oxidation flow reactor. *Atmos Chem Phys.* 19(15):9715–9731. doi:10.5194/acp-19-9715-2019.
- Li S-M, Leithead A, Moussa SG, Liggio J, Moran MD, Wang D, Hayden K, Darlington A, Gordon M, Staebler R, et al. 2017. Differences between measured and reported volatile organic compound emissions from oil sands facilities in Alberta, Canada. *Proc Natl Acad Sci.* 114(19):E3756–E3765. doi:10.1073/pnas.1617862114
- Liggio J, Li SM, Hayden K, Taha YM, Stroud C, Darlington A, Drollette BD, Gordon M, Lee P, Liu P, et al. 2016. Oil sands operations as a large source of secondary organic aerosols. *Nature.* 534(7605):91–94. doi:10.1038/nature17646

- Liggio J, Li SM, Staebler RM, Hayden K, Darlington A, Mittermeier RL, O'Brien J, McLaren R, Wolde M, Worthy D, et al. 2019. Measured Canadian oil sands CO<sub>2</sub> emissions are higher than estimates made using internationally recommended methods. *Nat Commun.* 10(1). doi:10.1038/s41467-019-09714-9.
- Liggio J, Moussa SG, Wentzell J, Darlington A, Liu P, Leithead A, Hayden K, O'Brien J, Mittermeier RL, Staebler R, et al. 2017. Understanding the primary emissions and secondary formation of gaseous organic acids in the oil sands region of Alberta, Canada. *Atmos Chem Phys.* 17: 8411–8427. doi.org/10.5194/acp-17-8411-2017
- Liggio J, Stroud CA, Wentzell JBB, Zhang J, Sommers J, Darlington A, Liu PSKK, Moussa SG, Leithead A, Hayden K, et al. 2017. Quantifying the Primary Emissions and Photochemical Formation of Isocyanic acid (HNCO) Downwind of Oil Sands Operations. *Environ Sci Technol.* 51(24):14462–14471. doi:10.1021/acs.est.7b04346
- Lovitt J, Rahman MM, Saraswati S, McDermid GJ, Strack M, Xu B. 2018. UAV Remote Sensing Can Reveal the Effects of Low-Impact Seismic Lines on Surface Morphology, Hydrology, and Methane (CH<sub>4</sub>) Release in a Boreal Treed Bog. *Journal of Geophysical Research: Biogeosciences.* 123(3):1117–1129.
- Lundin JI, Riffell JA, Wasser SK. 2015. Polycyclic aromatic hydrocarbons in caribou, moose, and wolf scat samples from three areas of the Alberta oil sands. *Environ Pollut.* 206:527-534. doi:10.1016/j.envpol.2015.07.035.
- MacKenzie MD, Dietrich ST. 2020. Atmospheric sulfur and nitrogen deposition in the Athabasca oil sands region is correlated with foliar nutrient levels and soil chemical properties. *Sci Total Environ.* 711:134737. doi:10.1016/j.scitotenv.2019.134737.
- Manzano CA, Marvin C, Muir D, Harner T, Martin J, Zhang Y. 2017. Heterocyclic Aromatics in Petroleum Coke, Snow, Lake Sediments, and Air Samples from the Athabasca Oil Sands Region. *Environ Sci Technol.* 51(10):5445–5453. doi:10.1021/acs.est.7b01345.
- Nimana B, Canter C, Kumar A. 2015. Energy consumption and greenhouse gas emissions in the recovery and extraction of crude bitumen from Canada's oil sands. *Appl Energy.* 143(2015):189–199. doi:10.1016/j.apenergy.2015.01.024.
- Parajulee A, Wania F. 2014. Evaluating officially reported polycyclic aromatic hydrocarbon emissions in the Athabasca oil sands region with a multimedia fate model. *Proc Natl Acad Sci U S A.* 111(9):3344–3349. doi:10.1073/pnas.1319780111.
- Parsons MT, McLennan D, Lapalme M, Mooney C, Watt C, Mintz R. 2013. Total gaseous mercury concentration measurements at fort mcmurray, Alberta, Canada. *Atmosphere (Basel).* 4(4):472–493. doi:10.3390/atmos4040472
- Percy, Jane. 2019. Harvesting Knowledge: Monitoring berries in the Athabasca Oil Sands region. <https://www12.statcan.gc.ca/census-recensement/2016/as-sa/98-200-x/2016022/98-200-x2016022-eng.cfm> [Accessed 2019 April 18]. Available from: <https://osmreport.ca/report/harvesting-knowledge/>
- Phillips-Smith C, Jeong CH, Healy RM, Dabek-Zlotorzynska E, Celo V, Brook JR, Evans G. 2017. Sources of particulate matter components in the Athabasca oil sands region: investigation through a comparison of trace element measurement methodologies. *Atmos Chem Phys.* 17(15):9435–9449. doi:10.5194/acp-17-9435-2017
- Proemse BC, Mayer B, Chow JC, Watson JG. 2012. Isotopic characterization of nitrate, ammonium and sulfate in stack PM<sub>2.5</sub> emissions in the Athabasca Oil Sands Region, Alberta, Canada. *Atmos Environ.* 60:555–563. doi:10.1016/j.atmosenv.2012.06.046
- Proemse BC, Mayer B, Fenn ME, Ross CS. 2013. A multi-isotope approach for estimating industrial contributions to atmospheric nitrogen deposition in the Athabasca oil sands region in Alberta, Canada. *Environ Pollut.* 182:80–91. doi:10.1016/j.envpol.2013.07.004
- Proemse BC, Mayer B, Fenn ME. 2012. Tracing industrial sulfur contributions to atmospheric sulfate deposition in the Athabasca oil sands region, Alberta, Canada. *Appl Geochemistry.* 27(12):2425–2434. doi:10.1016/j.apgeochem.2012.08.006
- Qiu X, Cheng I, Yang F, Horb E, Zhang L, Harner T. 2018. Emissions databases for polycyclic aromatic compounds in the Canadian Athabasca oil sands region-development using current knowledge and evaluation with passive sampling and air dispersion modelling data. *Atmos Chem Phys.* 18(5):3457–3467.

- Savard MM, Bégin C, Marion J. 2014. Modelling carbon isotopes in spruce trees reproduces air quality changes due to oil sands operations. *Ecological Indicators*. 45:1-8. doi:10.1016/j.ecolind.2014.03.005.
- Schuster JK, Harner T, Su K, Eng A, Wnorowski A, Charland JP. 2019. Temporal and Spatial Trends of Polycyclic Aromatic Compounds in Air across the Athabasca Oil Sands Region Reflect Inputs from Open Pit Mining and Forest Fires. *Environ Sci Technol Lett*. 6(3):178–183. doi:10.1021/acs.estlett.9b00010.
- Schuster JK, Harner T, Su K, Mihele C, Eng A. 2015. First Results from the Oil Sands Passive Air Monitoring Network for Polycyclic Aromatic Compounds. *Environ Sci Technol*. 49(5):2991–2998. doi:10.1021/es505684e
- Simpson IJ, Blake NJ, Barletta B, Diskin GS, Fuelberg HE, Gorham K, Huey LG, Meinardi S, Rowland FS, Vay SA, et al. 2010. Characterization of trace gases measured over Alberta oil sands mining operations: 76 speciated C2–C10 volatile organic compounds (VOCs), CO<sub>2</sub>, CH<sub>4</sub>, CO, NO, NO<sub>x</sub>. *Atmos Chem Phys* 10(23):11931–11954. doi:10.5194/acp-10-11931-2010.
- Small CC, Cho S, Hashisho Z, Ulrich AC. 2015. Emissions from oil sands tailings ponds: Review of tailings pond parameters and emission estimates. *J Pet Sci Eng*. 127:490–501. doi:10.1016/j.petrol.2014.11.020
- Stachiw S, Bicalho B, Grant-Weaver I, Noernberg T, Shotyk W. 2019. Trace elements in berries collected near upgraders and open pit mines in the Athabasca Bituminous Sands Region (ABSR): Distinguishing atmospheric dust deposition from plant uptake. *Sci Total Environ*. 670:849–864. doi:10.1016/j.scitotenv.2019.03.238.
- Strack M, Hayne S, Lovitt J, McDermid GJ, Rahman MM, Saraswati S, Xu B. 2019. Petroleum exploration increases methane emissions from northern peatlands. *Nature Communications*. 10(1):2804. doi:10.1038/s41467-019-10762-4.
- Thomas PJ, Eccles KM, Mundy LJ. 2017. Spatial modelling of non-target exposure to anticoagulant rodenticides can inform mitigation options in two boreal predators inhabiting areas with intensive oil and gas development. *Biol Conserv*. 212:111–119. doi:10.1016/j.biocon.2017.06.005.
- Thomas PJ, Newell EE, Eccles K, Holloway AC, Idowu I, Xia Z, Hassan E, Tomy G, Quenneville C. 2021. Co-exposures to trace elements and polycyclic aromatic compounds (PACs) impacts North American river otter (*Lontra canadensis*) baculum. *Chemosphere*. 265:128920. doi:10.1016/j.chemosphere.2020.128920.
- Tokarek TW, Odame-Ankrah CA, Huo JA, McLaren R, Lee AKY, Adam MG, Willis MD, Abbatt JPD, Mihele C, Darlington A, et al. 2018. Principal component analysis of summertime ground site measurements in the Athabasca oil sands with a focus on analytically unresolved intermediate-volatility organic compounds. *Atmos Chem Phys*. 18(24):17819–17841. doi:10.5194/acp-18-17819-2018.
- UNESCO (United Nations Educational, Scientific and Cultural Organization). 2017. World Heritage Centre. International Union for Conservation. Mission Report. Reactive Monitoring Mission to Wood Buffalo National Park, Canada [Mission Report].
- Vile MA, Kelman Wieder R, Živković T, Scott KD, Vitt DH, Hartsock JA, Iosue CL, Quinn JC, Petix M, Fillingim HM, et al. 2014. N<sub>2</sub>-fixation by methanotrophs sustains carbon and nitrogen accumulation in pristine peatlands. *Biogeochemistry*. 121(2):317–328. doi:10.1007/s10533-014-0019-6.
- Wang X, Chow JC, Kohl SD, Percy KE, Legge AH, Watson JG. 2015. Characterization of PM<sub>2.5</sub> and PM<sub>10</sub> fugitive dust source profiles in the Athabasca Oil Sands Region. *J Air Waste Manage Assoc*. 65(12):1421–1433. doi:10.1080/10962247.2015.1100693
- Wang X, Chow JC, Kohl SD, Percy KE, Legge AH, Watson JG. 2016. Real-world emission factors for Caterpillar 797B heavy haulers during mining operations. *Particuology*. 28: 22–30. doi:10.1016/j.partic.2015.07.001
- Wang X, Chow JC, Kohl SD, Yatavelli LNR, Percy KE, Legge AH, Watson JG. 2015. Wind erosion potential for fugitive dust sources in the Athabasca Oil Sands Region. *Aeolian Res*. 18:121–134. doi:10.1016/j.aeolia.2015.07.004



- Wang XL, Watson JG, Chow JC, Kohl SD, Chen LWA, Sodeman DA, Legge AH, Percy KE. 2012. Measurement of Real-World Stack Emissions with a Dilution Sampling System. In: *Developments in Environmental Science*. Vol. 11. Elsevier: 11. p. 171–192.
- Watmough SA, Bird A, McDonough A, Grimm E. 2019. Forest Fertilization Associated with Oil Sands Emissions. *Ecosystems*. 22(1):1–14. doi:10.1007/s10021-018-0249-x.
- Watmough SA, Whitfield CJ, Fenn ME. 2014. The importance of atmospheric base cation deposition for preventing soil acidification in the Athabasca Oil Sands Region of Canada. *Sci Total Environ*. 493:1–11. doi:10.1016/j.scitotenv.2014.05.110
- Watson JG, Chow JC, Wang XL, Kohl SD, Chen LWA, Etyemezian V. 2012. Overview of real-world emission characterization methods. *Dev Environ Sci*. 11:145–170. doi:10.1016/B978-0-08-097760-7.00007-X
- WBEA, 2014. Fort McKay Berry Focus Group Video. Available: <https://www.youtube.com/watch?v=F5pl6uPHJPc&t=657s>
- Wentworth GR, Aklilu Y-A, Landis MS, Hsu YM. 2018. Impacts of a large boreal wildfire on ground level atmospheric concentrations of PAHs, VOCs and ozone. *Atmos Environ*. 178(December 2017):19–30. doi:10.1016/j.atmosenv.2018.01.013.
- Whaley CH, Makar PA, Shephard MW, Zhang L, Zhang J, Zheng Q, Akingunola A, Wentworth GR, Murphy JG, Kharol SK, et al. 2018. Contributions of natural and anthropogenic sources to ambient ammonia in the Athabasca Oil Sands and north-western Canada. *Atmos Chem Phys*. 18:2011–2034. doi.org/10.5194/acp-18-2011-2018.
- Wood Buffalo Environmental Association (WEBA) 2014. Community odour monitoring project. Annual Report 2013-2014. No: 1410\_20898\_01\_03. [internet]. [Accessed 2019 May 22]. Available from: <https://wbea.org/resources/reports-publications/>
- Wood Buffalo Environmental Association (WEBA) 2015. Community odour monitoring project. Annual Report 2014-2015. No: 1410\_20898\_02\_01. [internet]. [Accessed 2019 May 21]. Available from: <https://wbea.org/resources/reports-publications/>
- Wren SN, Mihele CM, Lu G, Jiang Z, Wen D, Hayden K, Mittermeier RL, Staebler RM, Cober SG, Brook JR. 2020. Improving Insights on Air Pollutant Mixtures and Their Origins by Enhancing Local Monitoring in an Area of Intensive Resource Development. *Environ Sci Technol*. 54(23):14936-14945. doi: <https://doi.org/10.1021/acs.est.0c06055>
- Yang C, Wang Z, Yang Z, Hollebhone B, Brown CE, Landriault M, Fieldhouse B. 2011. Chemical fingerprints of Alberta oil sands and related petroleum products. *Environ Forensics*. 12(2):173–188. doi:10.1080/15275922.2011.574312.
- You Y, Moussa S, Zhang L, Fu L, Beck J, Staebler R. 2020b. Quantifying fugitive gas emissions from an oil sands tailings pond with open-path FTIR measurements. *Atmos Meas Tech Discuss*.(Aug):1–24. doi.org/10.5194/amt-2020-257
- You Y, Staebler R, Moussa S, Beck J, Mittermeier R. 2020a. Methane emissions from an oil sands tailings pond: A quantitative comparison of fluxes derived by different methods. *Atmos Meas Tech Discuss*.(May):1–24. doi:10.5194/amt-2020-116.
- Zhang J, Moran MD, Zheng Q, Makar PA, Baratzadeh P, Marson G, Liu P, Li S-M. 2018. Emissions preparation and analysis for multiscale air quality modelling over the Athabasca Oil Sands Region of Alberta, Canada. *Atmos. Chem. Phys*. 18: 10459-10481. <https://doi.org/10.5194/acp-18-10459-2018>
- Zhang L, Cho S, Hashisho Z, Brown C. 2019. Quantification of fugitive emissions from an oil sands tailings pond by eddy covariance. *Fuel*. 237(September 2018):457–464. doi:10.1016/j.fuel.2018.09.104.

Zhang Y, Shotyk W, Zaccone C, Noernberg T, Pelletier R, Bicalho B, Froese DG, Davies L, Martin JW. 2016. Airborne Petrocoke Dust is a Major Source of Polycyclic Aromatic Hydrocarbons in the Athabasca Oil Sands Region. *Environ Sci Technol*. 50(4):1711–1720. doi:10.1021/acs.est.5b05092.

## Geological setting

---

Anas MUM, Meegahage BJ, Evans MS, Jeffries DS, Wissel B. 2017. Scale-dependent effects of natural environmental gradients, industrial emissions and dispersal processes on zooplankton metacommunity structure: Implications for the bioassessment of boreal lakes. *Ecol Indic*. 82:484–494. doi:10.1016/j.ecolind.2017.07.035.

Blanar CA, Hewitt M, McMaster M, Kirk J, Wang Z, Norwood W, Marcogliese DJ. 2016. Parasite community similarity in Athabasca River trout-perch (*Percopsis omiscomaycus*) varies with local-scale land use and sediment hydrocarbons, but not distance or linear gradients. *Parasitol Res*. 115(10):3853–3866. doi:10.1007/s00436-016-5151-x.

Raine JC, Pietrock M, Willner K, Chung K, Turcotte D, Parrott JL. 2017. Parasitological Analysis and Gill Histopathology of Pearl Dace (*Semotilus Margarita*) and Brook Stickleback (*Culaea Inconstans*) Collected from the Athabasca Oil Sands Area (Canada). *Bull Environ Contam Toxicol*. 98(6):733–739. doi:10.1007/s00128-017-2078-6.

## Global background

---

Baray S, Darlington A, Gordon M, Hayden KL, Leithead A, Li S-M, Liu PSK, Mittermeier RL, Moussa SG, O'Brien J, Staebler R, Wolde M, Worthy D and McLaren R. 2018. Quantification of methane sources in the Athabasca Oil Sands Region of Alberta by aircraft mass balance. *Atmos Chem Phys*. 18(10):7361–7378. doi:10.5194/acp-18-7361-2018.

Brook JR, Cober SG, Freemark M, Harner T, Li SM, Liggio J, Makar P, Pauli B. 2019. Advances in science and applications of air pollution monitoring: A case study on oil sands monitoring targeting ecosystem protection. *J Air Waste Manag Assoc*. 69(6):661–709. doi:10.1080/10962247.2019.1607689.

Charpentier AD, Bergerson JA, MacLean HL. 2009. Understanding the Canadian oil sands industry's greenhouse gas emissions. *Environ Res Lett*. 4(1). doi:10.1088/1748-9326/4/1/014005.

Englander JG, Brandt AR, Elgowainy A, Cai H, Han J, Yeh S, Wang MQ. 2015. Oil sands energy intensity assessment using facility-level data. *Energy & Fuels*. 29(8):5204–5212. DOI: 10.1021/acs.energyfuels.5b00175

Gordon M, Li SM, Staebler R, Darlington A, Hayden K, O'Brien J, Wolde M. 2015. Determining air pollutant emission rates based on mass balance using airborne measurement data over the Alberta oil sands operations. *Atmos Meas Tech*. 8(9):3745–3765. doi:10.5194/amt-8-3745-2015

Howell SG, Clarke AD, Freitag S, McNaughton CS, Kapustin V, Brekovskikh V, Jimenez JL, Cubison MJ. 2014. An airborne assessment of atmospheric particulate emissions from the processing of Athabasca oil sands. *Atmos Chem Phys*. 14(10):5073–5087. doi:10.5194/acp-14-5073-2014

Johnson MR, Crosland BM, McEwen JD, Hager DB, Armitage JR, Karimi-Golpayegani M, Picard DJ. 2016. Estimating fugitive methane emissions from oil sands mining using extractive core samples. *Atmos Environ*. 144(July 2014):111–123. doi:10.1016/j.atmosenv.2016.08.073.

Liggio J, Li SM, Staebler RM, Hayden K, Darlington A, Mittermeier RL, O'Brien J, McLaren R, Wolde M, Worthy D, et al. 2019. Measured Canadian oil sands CO<sub>2</sub> emissions are higher than estimates made using internationally recommended methods. *Nat Commun*. 10(1). doi:10.1038/s41467-019-09714-9.

- Lovitt J, Rahman MM, Saraswati S, McDermid GJ, Strack M, Xu B. 2018. UAV Remote Sensing Can Reveal the Effects of Low-Impact Seismic Lines on Surface Morphology, Hydrology, and Methane (CH<sub>4</sub>) Release in a Boreal Treed Bog. *Journal of Geophysical Research: Biogeosciences*. 123(3):1117–1129.
- Nimana B, Canter C, Kumar A. 2015. Energy consumption and greenhouse gas emissions in the recovery and extraction of crude bitumen from Canada's oil sands. *Appl Energy*. 143(2015):189–199. doi:10.1016/j.apenergy.2015.01.024.
- Simpson IJ, Blake NJ, Barletta B, Diskin GS, Fuelberg HE, Gorham K, Huey LG, Meinardi S, Rowland FS, Vay SA, et al. 2010. Characterization of trace gases measured over Alberta oil sands mining operations: 76 speciated C<sub>2</sub>–C<sub>10</sub> volatile organic compounds (VOCs), CO<sub>2</sub>, CH<sub>4</sub>, CO, NO, NO<sub>x</sub>. *Atmos Chem Phys* 10(23):11931–11954. doi:10.5194/acp-10-11931-2010.
- Small CC, Cho S, Hashisho Z, Ulrich AC. 2015. Emissions from oil sands tailings ponds: Review of tailings pond parameters and emission estimates. *J Pet Sci Eng*. 127:490–501. doi:10.1016/j.petrol.2014.11.020
- Strack M, Hayne S, Lovitt J, McDermid GJ, Rahman MM, Saraswati S, Xu B. 2019. Petroleum exploration increases methane emissions from northern peatlands. *Nature Communications*. 10(1):2804. doi:10.1038/s41467-019-10762-4.
- Wang X, Chow JC, Kohl SD, Percy KE, Legge AH, Watson JG. 2016. Real-world emission factors for Caterpillar 797B heavy haulers during mining operations. *Particuology*. 28: 22–30. doi:10.1016/j.partic.2015.07.001
- Wang XL, Watson JG, Chow JC, Kohl SD, Chen LWA, Sodeman DA, Legge AH, Percy KE. 2012. Measurement of Real-World Stack Emissions with a Dilution Sampling System. In: *Developments in Environmental Science*. Vol. 11. Elsevier: 11. p. 171–192.
- Watson JG, Chow JC, Wang XL, Kohl SD, Chen LWA, Etyemezian V. 2012. Overview of real-world emission characterization methods. *Dev Environ Sci*. 11:145–170. doi:10.1016/B978-0-08-097760-7.00007-X
- You Y, Moussa S, Zhang L, Fu L, Beck J, Staebler R. 2020b. Quantifying fugitive gas emissions from an oil sands tailings pond with open-path FTIR measurements. *Atmos Meas Tech Discuss*.(Aug):1–24. doi.org/10.5194/amt-2020-257
- You Y, Staebler R, Moussa S, Beck J, Mittermeier R. 2020a. Methane emissions from an oil sands tailings pond: A quantitative comparison of fluxes derived by different methods. *Atmos Meas Tech Discuss*.(May):1–24. doi:10.5194/amt-2020-116.
- Zhang J, Moran MD, Zheng Q, Makar PA, Baratzadeh P, Marson G, Liu P, Li S-M. 2018. Emissions preparation and analysis for multiscale air quality modelling over the Athabasca Oil Sands Region of Alberta, Canada. *Atmos. Chem. Phys*. 18: 10459-10481. <https://doi.org/10.5194/acp-18-10459-2018>
- Zhang L, Cho S, Hashisho Z, Brown C. 2019. Quantification of fugitive emissions from an oil sands tailings pond by eddy covariance. *Fuel*. 237(September 2018):457–464. doi:10.1016/j.fuel.2018.09.104.

## Infrastructure

---

- Dunne BM, Quinn MS. 2009. Effectiveness of above-ground pipeline mitigation for moose (*Alces alces*) and other large mammals. *Biol Conserv*. 142(2):332–343. doi:10.1016/j.biocon.2008.10.029.
- Muhly T, Serrouya R, Neilson E, Li H, Boutin S. 2015. Influence of in-situ oil sands development on caribou (*Rangifer tarandus*) movement. *PLoS One*. 10(9):e0136933. doi:10.1371/journal.pone.0136933.

Shonfield J, Bayne E. 2017. The effect of industrial noise on owl occupancy in the boreal forest at multiple spatial scales. *Avian Conservation and Ecology*. 12(2). doi:10.5751/ACE-01042-120213.

Shonfield J, Bayne EM. 2019. Effects of industrial disturbance on abundance and activity of small mammals. *Can J Zool*. 97(11):1013–1020. doi:10.1139/cjz-2019-0098.

## Landscape disturbance

---

Abib TH, Chasmer L, Hopkinson C, Mahoney C, Rodriguez LCE. 2019. Seismic line impacts on proximal boreal forest and wetland environments in Alberta. *Sci Total Environ*. 658:1601–1613. doi:10.1016/j.scitotenv.2018.12.244.

Alexander AC, Chambers PA. 2016. Assessment of seven Canadian rivers in relation to stages in oil sands industrial development, 1972-2010. *Environ Rev*. 24(4):484–494. doi:10.1139/er-2016-0033.

Alexander AC, Levenstein B, Sanderson LA, Blukacz-Richards EA, Chambers PA. 2020. How does climate variability affect water quality dynamics in Canada's oil sands region? *Sci Total Environ*. 732:139062. doi:10.1016/j.scitotenv.2020.139062.

Anas MUM, Meegahage BJ, Evans MS, Jeffries DS, Wissel B. 2017. Scale-dependent effects of natural environmental gradients, industrial emissions and dispersal processes on zooplankton metacommunity structure: Implications for the bioassessment of boreal lakes. *Ecol Indic*. 82:484–494. doi:10.1016/j.ecolind.2017.07.035.

Arienti MC, Cumming SG, Krawchuk MA, Boutin S. 2009. Road network density correlated with increased lightning fire incidence in the Canadian western boreal forest. *Int J Wildl Fire*. 18(8):970. doi:10.1071/wf08011.

Ball J, Sólymos P, Schmiegelow F, Hache S, Schieck J, Bayne E. 2016. Regional habitat needs of a nationally listed species, Canada Warbler (*Cardellina canadensis*), in Alberta, Canada. *Avian Conservation and Ecology*. 11(2):10. doi:10.5751/ACE-00916-110210.

Blanar CA, Hewitt M, McMaster M, Kirk J, Wang Z, Norwood W, Marcogliese DJ. 2016. Parasite community similarity in Athabasca River trout-perch (*Percopsis omiscomaycus*) varies with local-scale land use and sediment hydrocarbons, but not distance or linear gradients. *Parasitol Res*. 115(10):3853–3866. doi:10.1007/s00436-016-5151-x.

Cameron EK, Bayne EM. 2009. Road age and its importance in earthworm invasion of northern boreal forests. *J Appl Ecol*. 46(1):28-36. doi:10.1111/j.1365-2664.2008.01535.x.

Dawe CA, Filicetti AT, Nielsen SE. 2017. Effects of linear disturbances and fire severity on velvet leaf blueberry abundance, vigor, and berry production in recently burned jack pine forests. *Forests*. 8(10):398. doi:10.3390/f8100398.

Dawe KL, Bayne EM, Boutin S. 2014. Influence of climate and human land use on the distribution of white-tailed deer (*Odocoileus virginianus*) in the western boreal forest. *Can J Zool*. 92(4):353-363. doi:10.1139/cjz-2013-0262.

Dawe KL, Boutin S. 2016. Climate change is the primary driver of white-tailed deer (*Odocoileus virginianus*) range expansion at the northern extent of its range; land use is secondary. *Ecol Evol*. 6(18):6435-6451. doi:10.1002/ece3.2316.

Dickie M, McNay SR, Sutherland GD, Cody M, Avgar T. 2020. Corridors or risk? Movement along, and use of, linear features varies predictably among large mammal predator and prey species. *J Anim Ecol*. 89(2):623–634. doi:10.1111/1365-2656.13130.

- Dickie M, Serrouya R, DeMars C, Cranston J, Boutin S. 2017. Evaluating functional recovery of habitat for threatened woodland caribou. *Ecosphere*. 8(9):e01936. doi:10.1002/ecs2.1936.
- Dickie M, Serrouya R, McNay RS, Boutin S. 2017. Faster and farther: wolf movement on linear features and implications for hunting behaviour. du Toit J, editor. *J Appl Ecol*. 54(1):253-263. doi:10.1111/1365-2664.12732.
- Domahidi Z, Shonfield J, Nielsen SE, Spence JR, Bayne EM. 2019. Spatial distribution of the boreal owl and northern saw-whet owl in the Boreal region of Alberta, Canada. *Avian Conserv Ecol*. 14(2). doi:10.5751/ACE-01445-140214.
- Evans MS, Talbot A. 2012. Investigations of mercury concentrations in walleye and other fish in the Athabasca River ecosystem with increasing oil sands developments. *J Environ Monit*. 14(7):1989–2003. doi:10.1039/c2em30132f.
- Ficken CD, Cobbaert D, Rooney RC. 2019. Low extent but high impact of human land use on wetland flora across the boreal oil sands region. *Sci Total Environ*. 693:133647. doi:10.1016/j.scitotenv.2019.133647.
- Fisher JT, Burton AC, Nolan L, Roy L. 2020. Influences of landscape change and winter severity on invasive ungulate persistence in the Nearctic boreal forest. *Sci Rep*. 10(1):1–11. doi:10.1038/s41598-020-65385-3.
- Fisher JT, Burton AC. 2018. Wildlife winners and losers in an oil sands landscape. *Frontiers in Ecology and the Environment*. 16(6):323-328. doi:10.1002/fee.1807.
- Foster KR, Godwin CM, Pyle P, Saracco JF. 2017. Reclamation and habitat-disturbance effects on landbird abundance and productivity indices in the oil sands region of northeastern Alberta, Canada. *Restoration Ecology*. 25(4):532-538. doi:10.1111/rec.12478.
- Garibaldi, Ann, Straker, Justin. 2009. Cultural keystone species in Oil Sands mine reclamation, Fort McKay, Alberta, Canada. Report in British Columbia Mine Reclamation Symposium, open collection. [Accessed 2019 May 2]. Available from: <https://open.library.ubc.ca/ciRcle/collections/59367/items/1.0042557>
- Gould, Lorne. 2012. Fort McKay First Nation models and data: What are they saying about cumulative effects on wildlife species important to the community of Fort McKay. Gould Environmental Ltd.
- Hedley RW, McLeod LJ, Yip DA, Farr D, Knaga P, Drake KL, Bayne E. 2020. Modeling the occurrence of the yellow rail (*Coturnicops noveboracensis*) in the context of ongoing resource development in the oil sands region of Alberta. *Avian Conserv Ecol*. 15(1):1–14. doi:10.5751/ACE-01538-150110.
- Independent Environmental Consultants (IEC). 2018. Milestone 2: Draft Report. Strategic Environmental Assessment of Wood Buffalo National Park World Heritage Site.
- Kansas J, Charlebois M, Skatter H. 2015. Vegetation recovery on low impact seismic lines in Alberta's oil sands and visual obstruction of wolves and woodland caribou. *Can Wildl Biol Manag*. 4(2):137–149.
- Laird KR, Mushet GR, Flower RJ, Wolfe AP, Cumming BF. 2020. Heterogeneous response of diatom assemblages since ca. 1945 in lakes from boreal regions of northern Alberta and Saskatchewan, Canada. *J Paleolimnol*. 64(2):137–153. doi:10.1007/s10933-020-00128-y.
- Latham ADM, Latham MC, Boyce MS, Boutin S. 2011. Movement responses by wolves to industrial linear features and their effect on woodland caribou in northeastern Alberta. *Ecol Appl*. 21(8):2854-2865. doi:10.1890/11-0666.1.
- Latham ADM, Latham MC, Boyce MS, Boutin S. 2013. Spatial relationships of sympatric wolves (*Canis lupus*) and coyotes (*C. latrans*) with woodland caribou (*Rangifer tarandus caribou*) during the calving season in a human-modified boreal landscape. *Wildl Res*. 40(3):250-260. doi:10.1071/WR12184.

- Latham ADM, Latham MC, Boyce MS. 2011. Habitat selection and spatial relationships of black bears (*Ursus americanus*) with woodland caribou (*Rangifer tarandus caribou*) in northeastern Alberta. *Can J Zool.* 89(4):267-277. doi:10.1139/z10-115.
- Latifovic R, Pouliot D. 2014. Monitoring cumulative long-term vegetation changes over the Athabasca Oil Sands region. *IEEE J Sel Top Appl Earth Obs Remote Sens.* 7(8):3380-3392. doi:10.1109/JSTARS.2014.2321058.
- Mahon CL, Holloway G, Sólymos P, Cumming SG, Bayne EM, Schmiegelow FKA, Song SJ. 2016. Community structure and niche characteristics of upland and lowland western boreal birds at multiple spatial scales. *Forest Ecology and Management.* 361:99-116. doi:10.1016/j.foreco.2015.11.007.
- Mahon CL, Holloway GL, Bayne EM, Toms JD. 2019 May 23. Additive and interactive cumulative effects on boreal landbirds: winners and losers in a multi-stressor landscape. *Ecol Appl.*:e01895. doi:10.1002/eap.1895.
- Mao L, Dennett J, Bater CW, Tompalski P, Coops NC, Farr D, Kohler M, White B, Stadt JJ, Nielsen SE. 2018. Using airborne laser scanning to predict plant species richness and assess conservation threats in the oil sands region of Alberta's boreal forest. *For Ecol Manage.* 409:29–37. doi:10.1016/j.foreco.2017.11.017.
- Mayor SJ, Boutin S, He F, Cahill JF. 2015. Limited impacts of extensive human land use on dominance, specialization, and biotic homogenization in boreal plant communities. *BMC Ecology.* 15(1):5. doi:10.1186/s12898-015-0037-9.
- Mayor SJ, Cahill JF, He F, Sólymos P, Boutin S. 2012. Regional boreal biodiversity peaks at intermediate human disturbance. *Nat Commun.* 3:1142. doi:10.1038/ncomms2145.
- Neilson EW, Boutin S. 2017. Human disturbance alters the predation rate of moose in the Athabasca oil sands. *Ecosphere.* 8(8):e01913. doi:10.1002/ecs2.1913.
- Parlee, B., Geertsema, K. & Willier, A. 2012. Social-Ecological Thresholds in a Changing Boreal Landscape: Insights from Cree Knowledge of the Lesser Slave Lake Region of Alberta, Canada. *Ecology & Society* 17(2):20.
- Raine JC, Pietrock M, Willner K, Chung K, Turcotte D, Parrott JL. 2017. Parasitological Analysis and Gill Histopathology of Pearl Dace (*Semotilus Margarita*) and Brook Stickleback (*Culaea Inconstans*) Collected from the Athabasca Oil Sands Area (Canada). *Bull Environ Contam Toxicol.* 98(6):733–739. doi:10.1007/s00128-017-2078-6.
- Riva F, Acorn JH, Nielsen SE. 2018. Narrow anthropogenic corridors direct the movement of a generalist boreal butterfly. *Biol Lett.* 14(2):20170770. doi:10.1098/rsbl.2017.0770.
- Riva F, Acorn JH, Nielsen SE. 2018a. Distribution of Cranberry Blue Butterflies (*Agriades optilete*) and Their Responses to Forest Disturbance from In Situ Oil Sands and Wildfires. *Diversity.* 10(4). doi:10.3390/d10040112.
- Riva F, Acorn JH, Nielsen SE. 2018b. Localized disturbances from oil sands developments increase butterfly diversity and abundance in Alberta's boreal forests. *Biological Conservation.* 217:173-180. doi:10.1016/j.biocon.2017.10.022.
- Riva F, Pinzon J, Acorn JH, Nielsen SE. 2020. Composite Effects of Cutlines and Wildfire Result in Fire Refuges for Plants and Butterflies in Boreal Treed Peatlands. *Ecosystems.* 23(3):485–497. doi:10.1007/s10021-019-00417-2.
- Roberts D, Ciuti S, Barber QE, Willier C, Nielsen SE. 2018. Accelerated seed dispersal along linear disturbances in the Canadian oil sands region. *Scientific Reports.* 8(1):4828. doi:10.1038/s41598-018-22678-y.
- Schwalb AN, Alexander AC, Paul AJ, Cottenie K, Rasmussen JB. 2015. Changes in migratory fish communities and their health, hydrology, and water chemistry in rivers of the Athabasca oil sands region: A review of historical and current data. *Environ Rev.* 23(2):133–150. doi:10.1139/er-2014-0065.

- Seitz NE, Westbrook CJ, Dubé MG, Squires AJ. 2013. Assessing large spatial scale landscape change effects on water quality and quantity response in the lower Athabasca River basin. *Integr Environ Assess Manag.* 9(3):392–404. doi:10.1002/ieam.1336.
- Singer H V., Slattery SM, Armstrong L, Witherly S. 2020. Assessing breeding duck population trends relative to anthropogenic disturbances across the Boreal plains of Canada, 1960–2007. *Avian Conserv Ecol.* 15(1):1. doi:10.5751/ACE-01493-150101.
- Stern ER, Riva F, Nielsen SE. 2018. Effects of Narrow Linear Disturbances on Light and Wind Patterns in Fragmented Boreal Forests in Northeastern Alberta. *Forests.* 9(8):486. doi:10.3390/f9080486.
- Stevenson CJ, Filicetti AT, Nielsen SE. 2019. High precision altimeter demonstrates simplification and depression of microtopography on seismic lines in treed peatlands. *Forests.* 10(4):295. doi:10.3390/f10040295.
- Stewart FEC, Nowak JJ, Micheletti T, McIntire EJB, Schmiegelow FKA, Cumming SG. 2020. Boreal Caribou Can Coexist with Natural but Not Industrial Disturbances. *J Wildl Manage.* 84(8):1435–1444. doi:10.1002/jwmg.21937.
- Tattersall ER, Burgar JM, Fisher JT, Burton AC. 2020. Boreal predator co-occurrences reveal shared use of seismic lines in a working landscape. *Ecol Evol.* 10(3):1678–1691. doi:10.1002/ece3.6028.
- Tattersall ER, Burgar JM, Fisher JT, Burton AC. 2020. Mammal seismic line use varies with restoration: Applying habitat restoration to species at risk conservation in a working landscape. *Biol Conserv.* 241:108295. doi:10.1016/j.biocon.2019.108295.
- Toews M, Juanes F, Burton AC. 2017. Mammal responses to human footprint vary with spatial extent but not with spatial grain. *Ecosphere.* 8(3). doi:10.1002/ecs2.1735.
- Toews M, Juanes F, Burton AC. 2018. Mammal responses to the human footprint vary across species and stressors. *Journal of Environmental Management.* 217:690–699. doi:10.1016/j.jenvman.2018.04.009.
- UNESCO (United Nations Educational, Scientific and Cultural Organization). 2017. World Heritage Centre. International Union for Conservation. Mission Report. Reactive Monitoring Mission to Wood Buffalo National Park, Canada [Mission Report].
- Van Wilgenburg S, Hobson K, Bayne E, Koper N. 2013. Estimated Avian Nest Loss Associated with Oil and Gas Exploration and Extraction in the Western Canadian Sedimentary Basin. *Avian Conservation and Ecology.* 8(2). doi:10.5751/ACE-00585-080209.
- Wasser SK, Keim JL, Taper ML, Lele SR. 2011. The influences of wolf predation, habitat loss, and human activity on caribou and moose in the Alberta oil sands. *Frontiers in Ecology and the Environment.* 9(10):546–551. doi:10.1890/100071.
- Wilson S, Saracco JF, Flockhart DTT, Godwin CM, Foster KR. 2018. Drivers of demographic decline across the annual cycle of a threatened migratory bird. *Scientific Reports.* 8(7316). doi:10.1038/s41598-018-25633-z.
- Wilson SJ, Bayne EM. 2018. Use of an acoustic location system to understand how presence of conspecifics and canopy cover influence ovenbird (*Seiurus aurocapilla*) space use near reclaimed wellsites in the boreal forest of alberta. *Avian Conserv Ecol.* 13(2). doi:10.5751/ACE-01248-130204.
- Zhang J, Kissling WD, He F. 2013. Local forest structure, climate and human disturbance determine regional distribution of boreal bird species richness in Alberta, Canada. *Journal of Biogeography.* 40(6):1131–1142. doi:10.1111/jbi.12063.
- Zhang J, Mayor SJ, He F. 2014. Does disturbance regime change community assembly of angiosperm plant communities in the boreal forest? *J Plant Ecol.* 7(2):188–201. doi:10.1093/jpe/rtt068.

## Natural disturbance

---

- Ahad JME, Jautzy JJ, Cumming BF, Das B, Laird KR, Sanei H. 2015. Sources of polycyclic aromatic hydrocarbons (PAHs) to northwestern Saskatchewan lakes east of the Athabasca oil sands. *Org Geochem*. 80:35–45. doi:10.1016/j.orggeochem.2015.01.001.
- Lundin JI, Riffell JA, Wasser SK. 2015. Polycyclic aromatic hydrocarbons in caribou, moose, and wolf scat samples from three areas of the Alberta oil sands. *Environ Pollut*. 206:527-534. doi:10.1016/j.envpol.2015.07.035.
- Riva F, Acorn JH, Nielsen SE. 2018a. Distribution of Cranberry Blue Butterflies (*Agriades optilete*) and Their Responses to Forest Disturbance from In Situ Oil Sands and Wildfires. *Diversity*. 10(4). doi:10.3390/d10040112.
- Riva F, Pinzon J, Acorn JH, Nielsen SE. 2020. Composite Effects of Cutlines and Wildfire Result in Fire Refuges for Plants and Butterflies in Boreal Treed Peatlands. *Ecosystems*. 23(3):485–497. doi:10.1007/s10021-019-00417-2.
- Stewart FEC, Nowak JJ, Micheletti T, McIntire EJB, Schmiegelow FKA, Cumming SG. 2020. Boreal Caribou Can Coexist with Natural but Not Industrial Disturbances. *J Wildl Manage*. 84(8):1435–1444. doi:10.1002/jwmg.21937.
- Wasser SK, Keim JL, Taper ML, Lele SR. 2011. The influences of wolf predation, habitat loss, and human activity on caribou and moose in the Alberta oil sands. *Frontiers in Ecology and the Environment*. 9(10):546-551. doi:10.1890/100071.

## Non-oil sands landscape disturbance

---

- Arienti MC, Cumming SG, Krawchuk MA, Boutin S. 2009. Road network density correlated with increased lightning fire incidence in the Canadian western boreal forest. *Int J Wildl Fire*. 18(8):970. doi:10.1071/wf08011.
- Ball J, Sóllymos P, Schmiegelow F, Hache S, Schieck J, Bayne E. 2016. Regional habitat needs of a nationally listed species, Canada Warbler (*Cardellina canadensis*), in Alberta, Canada. *Avian Conservation and Ecology*. 11(2):10. doi:10.5751/ACE-00916-110210.
- Cadieux P, Boulanger Y, Cyr D, Taylor AR, Price DT, Sóllymos P, Stralberg D, Chen H, Brecka A, Tremblay JA. 2020. Projected effects of climate change on boreal bird community accentuated by anthropogenic disturbances in western boreal forest, Canada. *Divers Distrib*.:1–15. doi:10.1111/ddi.13057.
- Dawe KL, Bayne EM, Boutin S. 2014. Influence of climate and human land use on the distribution of white-tailed deer (*Odocoileus virginianus*) in the western boreal forest. *Can J Zool*. 92(4):353-363. doi:10.1139/cjz-2013-0262.
- Dawe KL, Boutin S. 2016. Climate change is the primary driver of white-tailed deer (*Odocoileus virginianus*) range expansion at the northern extent of its range; land use is secondary. *Ecol Evol*. 6(18):6435-6451. doi:10.1002/ece3.2316.
- Domahidi Z, Shonfield J, Nielsen SE, Spence JR, Bayne EM. 2019. Spatial distribution of the boreal owl and northern saw-whet owl in the Boreal region of Alberta, Canada. *Avian Conserv Ecol*. 14(2). doi:10.5751/ACE-01445-140214.
- Fisher JT, Burton AC. 2018. Wildlife winners and losers in an oil sands landscape. *Frontiers in Ecology and the Environment*. 16(6):323-328. doi:10.1002/fee.1807.
- Latham ADM, Latham MC, Boyce MS, Boutin S. 2013. Spatial relationships of sympatric wolves (*Canis lupus*) and coyotes (*C. latrans*) with woodland caribou (*Rangifer tarandus caribou*) during the calving season in a human-modified boreal landscape. *Wildl Res*. 40(3):250-260. doi:10.1071/WR12184.



- Latham ADM, Latham MC, Boyce MS. 2011. Habitat selection and spatial relationships of black bears (*Ursus americanus*) with woodland caribou (*Rangifer tarandus caribou*) in northeastern Alberta. *Can J Zool.* 89(4):267-277. doi:10.1139/z10-115.
- Latifovic R, Pouliot D. 2014. Monitoring cumulative long-term vegetation changes over the Athabasca Oil Sands region. *IEEE J Sel Top Appl Earth Obs Remote Sens.* 7(8):3380-3392. doi:10.1109/JSTARS.2014.2321058.
- Mahon CL, Holloway G, Sólymos P, Cumming SG, Bayne EM, Schmiegelow FKA, Song SJ. 2016. Community structure and niche characteristics of upland and lowland western boreal birds at multiple spatial scales. *Forest Ecology and Management.* 361:99-116. doi:10.1016/j.foreco.2015.11.007.
- Mayor SJ, Boutin S, He F, Cahill JF. 2015. Limited impacts of extensive human land use on dominance, specialization, and biotic homogenization in boreal plant communities. *BMC Ecology.* 15(1):5. doi:10.1186/s12898-015-0037-9.
- Mayor SJ, Cahill JF, He F, Sólymos P, Boutin S. 2012. Regional boreal biodiversity peaks at intermediate human disturbance. *Nat Commun.* 3:1142. doi:10.1038/ncomms2145.
- Morissette JL, Bayne EM, Kardynal KJ, Hobson KA. 2019. Regional variation in responses of wetland-associated bird communities to conversion of boreal forest to agriculture. *Avian Conserv Ecol.* 14(1). doi:10.5751/ACE-01355-140112.
- Riva F, Acorn JH, Nielsen SE. 2018b. Localized disturbances from oil sands developments increase butterfly diversity and abundance in Alberta's boreal forests. *Biological Conservation.* 217:173-180. doi:10.1016/j.biocon.2017.10.022.
- Singer H V., Slattery SM, Armstrong L, Witherly S. 2020. Assessing breeding duck population trends relative to anthropogenic disturbances across the Boreal plains of Canada, 1960–2007. *Avian Conserv Ecol.* 15(1):1. doi:10.5751/ACE-01493-150101.
- Toews M, Juanes F, Burton AC. 2017. Mammal responses to human footprint vary with spatial extent but not with spatial grain. *Ecosphere.* 8(3). doi:10.1002/ecs2.1735.
- Toews M, Juanes F, Burton AC. 2018. Mammal responses to the human footprint vary across species and stressors. *Journal of Environmental Management.* 217:690-699. doi:10.1016/j.jenvman.2018.04.009.
- Wilson S, Saracco JF, Flockhart DTT, Godwin CM, Foster KR. 2018. Drivers of demographic decline across the annual cycle of a threatened migratory bird. *Scientific Reports.* 8(7316). doi:10.1038/s41598-018-25633-z.
- Zhang J, Mayor SJ, He F. 2014. Does disturbance regime change community assembly of angiosperm plant communities in the boreal forest? *J Plant Ecol.* 7(2):188-201. doi:10.1093/jpe/rtt068.

## Oil sands production

---

- Ahad JME, Pakdel H, Savard MM, Calderhead AI, Gammon PR, Rivera A, Peru KM, Headley J V. 2013. Characterization and quantification of mining-related "naphthenic acids" in groundwater near a major oil sands tailings pond. *Environ Sci Technol.* 47(10):5023–5030. doi:10.1021/es3051313.
- Arciszewski TJ, Munkittrick KR, Kilgour BW, Keith HM, Linehan JE, McMaster ME. 2017. Increased size and relative abundance of migratory fishes observed near the Athabasca oil sands. *Facets.* 2(2):833–858. doi:10.1139/facets-2017-0028.
- Arens CJ, Arens JC, Hogan NS, Kavanagh RJ, Berrue F, Van Der Kraak GJ, van den Heuvel MR. 2017. Population impacts in white sucker (*Catostomus commersonii*) exposed to oil sands–derived contaminants in the Athabasca River. *Environ Toxicol Chem.* 36(8):2058–2067. doi:10.1002/etc.3735.

Chibwe, L., Roberts, S., Shang, D., Yang, F., Manzano, C.A., Wang, X., Kirk, J.L. and Muir, D.C., 2020. A one-century sedimentary record of N-and S-polycyclic aromatic compounds in the Athabasca oil sands region in Canada. *Chemosphere*, 260, p.127641.

Jautzy J, Ahad JME, Gobeil C, Savard MM. 2013. Century-long source apportionment of PAHs in athabasca oil sands region lakes using diagnostic ratios and compound-specific carbon isotope signatures. *Environ Sci Technol*. 47(12):6155–6163. doi:10.1021/es400642e.

Jautzy JJ, Ahad JME, Gobeil C, Smirnoff A, Barst BD, Savard MM. 2015. Isotopic Evidence for Oil Sands Petroleum Coke in the Peace-Athabasca Delta. *Environ Sci Technol*. 49(20):12062–12070. doi:10.1021/acs.est.5b03232.

Ross MS, Pereira ADS, Fennell J, Davies M, Johnson J, Sliva L, Martin JW. 2012. Quantitative and qualitative analysis of naphthenic acids in natural waters surrounding the canadian oil sands industry. *Environ Sci Technol*. 46(23):12796–12805. doi:10.1021/es303432u.

Singhroy V, Li J, Samsonov S, Shen L, Pearse J. 2014. InSAR monitoring of surface deformation induced by steam injection in the Athabasca oil sands, Canada. In: 2014 IEEE Geoscience and Remote Sensing Symposium. IEEE. p. 4796-4799.

Sun C, Shotyk W, Cuss CW, Donner MW, Fennell J, Javed M, Noernberg T, Poesch M, Pelletier R, Sinnatamby N, et al. 2017. Characterization of Naphthenic Acids and Other Dissolved Organics in Natural Water from the Athabasca Oil Sands Region, Canada. *Environ Sci Technol*. 51(17):9524–9532. doi:10.1021/acs.est.7b02082.

## Operational spills and leaks

---

Timoney KP, Lee P. 2009. Does the Alberta Tar Sands Industry Pollute? The Scientific Evidence. *Open Conserv Biol J*. 3(1):65–81. doi:10.2174/1874839200903010065.

## Urban development

---

Pilote M, André C, Turcotte P, Gagné F, Gagnon C. 2018. Metal bioaccumulation and biomarkers of effects in caged mussels exposed in the Athabasca oil sands area. *Sci Total Environ*. 610–611:377–390. doi:10.1016/j.scitotenv.2017.08.023.

### Weather & climate change

Alexander AC, Levenstein B, Sanderson LA, Blukacz-Richards EA, Chambers PA. 2020. How does climate variability affect water quality dynamics in Canada's oil sands region? *Sci Total Environ*. 732:139062. doi:10.1016/j.scitotenv.2020.139062.

Arienti MC, Cumming SG, Krawchuk MA, Boutin S. 2009. Road network density correlated with increased lightning fire incidence in the Canadian western boreal forest. *Int J Wildl Fire*. 18(8):970. doi:10.1071/wf08011.

Barber QE, Parisien MA, Whitman E, Stralberg D, Johnson CJ, St-Laurent MH, DeLancey ER, Price DT, Arseneault D, Wang X, et al. 2018. Potential impacts of climate change on the habitat of boreal woodland caribou. *Ecosphere*. 9(10). doi:10.1002/ecs2.2472.

Cadieux P, Boulanger Y, Cyr D, Taylor AR, Price DT, Sólymos P, Stralberg D, Chen H, Brecka A, Tremblay JA. 2020. Projected effects of climate change on boreal bird community accentuated by anthropogenic disturbances in western boreal forest, Canada. *Divers Distrib*.:1–15. doi:10.1111/ddi.13057.

Dawe KL, Bayne EM, Boutin S. 2014. Influence of climate and human land use on the distribution of white-tailed deer (*Odocoileus virginianus*) in the western boreal forest. *Can J Zool*. 92(4):353-363. doi:10.1139/cjz-2013-0262.

Dawe KL, Boutin S. 2016. Climate change is the primary driver of white-tailed deer (*Odocoileus virginianus*) range expansion at the northern extent of its range; land use is secondary. *Ecol Evol.* 6(18):6435-6451. doi:10.1002/ece3.2316.

Fernie KJ, Marteinson SC, Chen D, Palace V, Peters L, Soos C, Smits JEG. 2019. Changes in thyroid function of nestling tree swallows (*Tachycineta bicolor*) in relation to polycyclic aromatic compounds and other environmental stressors in the Athabasca Oil Sands Region. *Environ Res.* 169(November 2018):464–475. doi:10.1016/j.envres.2018.11.031.

Fernie KJ, Marteinson SC, Soos C, Chen D, Cruz-Martinez L, Smits JEG. 2018. Reproductive and developmental changes in tree swallows (*Tachycineta bicolor*) are influenced by multiple stressors, including polycyclic aromatic compounds, in the Athabasca Oil Sands. *Environ Pollut.* 238:931-941. doi:10.1016/j.envpol.2018.03.074.

Fisher JT, Burton AC, Nolan L, Roy L. 2020. Influences of landscape change and winter severity on invasive ungulate persistence in the Nearctic boreal forest. *Sci Rep.* 10(1):1–11. doi:10.1038/s41598-020-65385-3.

Godwin CM, Barclay RMR, Smits JEG. 2019. Tree Swallow (*Tachycineta bicolor*) nest success and nestling growth near oil sands mining operations in northeastern Alberta, Canada. *Can J Zool.* 97(6):547-557. doi:10.1139/cjz-2018-0247.

Hebert CE, Campbell D, Kindopp R, MacMillan S, Martin P, Neugebauer E, Patterson L, Shatford J. 2013. Mercury trends in colonial waterbird eggs downstream of the oil sands region of Alberta, Canada. *Environ Sci Technol.* 47(20):11785-11792. doi:10.1021/es402542w.

Hebert CE. 2019. The river runs through it: The Athabasca River delivers mercury to aquatic birds breeding far downstream. *PLoS One.* 14(4):1-19. doi:10.1371/journal.pone.0206192.

Laird KR, Mushet GR, Flower RJ, Wolfe AP, Cumming BF. 2020. Heterogeneous response of diatom assemblages since ca. 1945 in lakes from boreal regions of northern Alberta and Saskatchewan, Canada. *J Paleolimnol.* 64(2):137–153. doi:10.1007/s10933-020-00128-y.

Latham ADM, Latham MC, Boyce MS, Boutin S. 2011. Movement responses by wolves to industrial linear features and their effect on woodland caribou in northeastern Alberta. *Ecol Appl.* 21(8):2854-2865. doi:10.1890/11-0666.1.

Latham ADM, Latham MC, Knopff KH, Hebblewhite M, Boutin S. 2013. Wolves, white-tailed deer, and beaver: Implications of seasonal prey switching for woodland caribou declines. *Ecography (Cop).* 36(12):1276–1290. doi:10.1111/j.1600-0587.2013.00035.x.

Libera N, Summers JC, Rühland KM, Kurek J, Smol JP. 2020. Diatom assemblage changes in shallow lakes of the Athabasca Oil Sands Region are not tracking aerially deposited contaminants. *J Paleolimnol.* 64(3):257–272. doi:10.1007/s10933-020-00136-y.

Summers JC, Kurek J, Kirk JL, Muir DCG, Wang X, Wiklund JA, Cooke CA, Evans MS, Smol JP. 2016. Recent warming, rather than industrial emissions of bioavailable nutrients, is the dominant driver of lake primary production shifts across the Athabasca Oil Sands Region. *PLoS One.* 11(5). doi:10.1371/journal.pone.0153987.

Summers JC, Kurek J, Rühland KM, Neville EE, Smol JP. 2017. Assessment of multi-trophic changes in a shallow boreal lake simultaneously exposed to climate change and aerial deposition of contaminants from the Athabasca Oil Sands Region, Canada. *Sci Total Environ.* 592:573–583. doi:10.1016/j.scitotenv.2017.03.079.

UNESCO (United Nations Educational, Scientific and Cultural Organization). 2017. World Heritage Centre. International Union for Conservation. Mission Report. Reactive Monitoring Mission to Wood Buffalo National Park, Canada [Mission Report].

Ward EM, Gorelick SM. 2018. Drying drives decline in muskrat population in the Peace-Athabasca Delta, Canada. *Environ Res Lett.* 13(12):124026. doi:10.1088/1748-9326/aaf0ec.

Zhang J, Kissling WD, He F. 2013. Local forest structure, climate and human disturbance determine regional distribution of boreal bird species richness in Alberta, Canada. *Journal of Biogeography*. 40(6):1131-1142. doi:10.1111/jbi.12063.

## Stressor

---

## Contaminants

---

- Adamache, Lori, Spink, David. 2012. Cumulative Effects: Concerns of Fort McKay regarding the impacts of emissions to air from industrial development. Prepared for the Fort McKay Sustainability Department. September 2012.
- Adams C, McLinden CA, Shephard MW, Dickson N, Dammers E, Chen J, Makar P, Cady-Pereira KE, Tam N, Kharol SK, et al. 2019. Satellite-derived emissions of carbon monoxide, ammonia, and nitrogen dioxide from the 2016 Horse River wildfire in the Fort McMurray area. *Atmos Chem Phys*. 19(4):2577–2599. doi:10.5194/acp-19-2577-2019.
- Ahad JME, Jautzy JJ, Cumming BF, Das B, Laird KR, Sanei H. 2015. Sources of polycyclic aromatic hydrocarbons (PAHs) to northwestern Saskatchewan lakes east of the Athabasca oil sands. *Org Geochem*. 80:35–45. doi:10.1016/j.orggeochem.2015.01.001.
- Ahad JME, Pakdel H, Savard MM, Calderhead AI, Gammon PR, Rivera A, Peru KM, Headley J V. 2013. Characterization and quantification of mining-related "naphthenic acids" in groundwater near a major oil sands tailings pond. *Environ Sci Technol*. 47(10):5023–5030. doi:10.1021/es3051313.
- Akingunola A, Makar PA, Zhang J, Darlington A, Li SM, Gordon M, Moran MD, Zheng Q. 2018. A chemical transport model study of plume-rise and particle size distribution for the Athabasca oil sands. *Atmos Chem Phys*. 18(12):8667–8688. doi:10.5194/acp-18-8667-2018.
- Akre CJ, Headley J V., Conly FM, Peru KM, Dickson LC. 2004. Spatial Patterns of Natural Polycyclic Aromatic Hydrocarbons in Sediment in the Lower Athabasca River. *J Environ Sci Heal - Part A Toxic/Hazardous Subst Environ Eng*. 39(5):1163–1176. doi:10.1081/ESE-120030301.
- Alexander AC, Chambers PA, Jeffries DS. 2017. Episodic acidification of 5 rivers in Canada's oil sands during snowmelt: A 25-year record. *Sci Total Environ*. 599–600:739–749. doi:10.1016/j.scitotenv.2017.04.207.
- Alexander AC, Chambers PA. 2016. Assessment of seven Canadian rivers in relation to stages in oil sands industrial development, 1972-2010. *Environ Rev*. 24(4):484–494. doi:10.1139/er-2016-0033.
- Anas MU, Scott KA, Cooper RN, Wissel B. 2014. Zooplankton communities are good indicators of potential impacts of athabasca oil sands operations on downwind boreal lakes. *Can J Fish Aquat Sci*. 71(5):719–732. doi:10.1139/cjfas-2013-0472.
- Anas MUM, Meegahage BJ, Evans MS, Jeffries DS, Wissel B. 2017. Scale-dependent effects of natural environmental gradients, industrial emissions and dispersal processes on zooplankton metacommunity structure: Implications for the bioassessment of boreal lakes. *Ecol Indic*. 82:484–494. doi:10.1016/j.ecolind.2017.07.035.
- Arciszewski TJ, Hazewinkel RR, Munkittrick KR, Kilgour BW. 2018. Developing and applying control charts to detect changes in water chemistry parameters measured in the Athabasca River near the oil sands: A tool for surveillance monitoring. *Environ Toxicol Chem*. 37(9):2296–2311. doi:10.1002/etc.4168.
- Arciszewski TJ, Munkittrick KR, Kilgour BW, Keith HM, Linehan JE, McMaster ME. 2017. Increased size and relative abundance of migratory fishes observed near the Athabasca oil sands. *Facets*. 2(2):833–858. doi:10.1139/facets-2017-0028.

- Arens CJ, Arens JC, Hogan NS, Kavanagh RJ, Berrue F, Van Der Kraak GJ, van den Heuvel MR. 2017. Population impacts in white sucker (*Catostomus commersonii*) exposed to oil sands–derived contaminants in the Athabasca River. *Environ Toxicol Chem.* 36(8):2058–2067. doi:10.1002/etc.3735.
- Baray S, Darlington A, Gordon M, Hayden KL, Leithead A, Li S-M, Liu PSK, Mittermeier RL, Moussa SG, O'Brien J, Staebler R, Wolde M, Worthy D and McLaren R. 2018. Quantification of methane sources in the Athabasca Oil Sands Region of Alberta by aircraft mass balance. *Atmos Chem Phys.* 18(10):7361–7378. doi:10.5194/acp-18-7361-2018.
- Bari MA and Kindzierski WB, 2018. Ambient volatile organic compounds (VOCs) in communities of the Athabasca oil sands region: Sources and screening health risk assessment. *Environ Pollut* 235: 602-614. <https://doi.org/10.1016/j.envpol.2017.12.065>
- Bari MA, Kindzierski WB and Cho S. 2014. A wintertime investigation of atmospheric deposition of metals and polycyclic aromatic hydrocarbons in the Athabasca Oil Sands Region, Canada. *Sci Total Environ* 485-486: 180-192. <http://dx.doi.org/10.1016/j.scitotenv.2014.03.088>
- Bari MA, Kindzierski WB and Spink D. 2016. Twelve-year trends in ambient concentrations of volatile organic compounds in a community of the Alberta Oil Sands Region, Canada. *Environ Int* 91: 40-50. <http://dx.doi.org/10.1016/j.envint.2016.02.015>
- Bari MA, Kindzierski WB. 2015. Fifteen-year trends in criteria air pollutants in oil sands communities of Alberta, Canada. *Environ Int* 74:200–208. <https://doi.org/10.1016/j.envint.2014.10.009>
- Bari MA, Kindzierski WB. 2016. Evaluation of air quality indicators in Alberta, Canada—An international perspective. *Environ Int* 92: 119-129. <http://dx.doi.org/10.1016/j.envint.2016.03.021>
- Bari MA, Kindzierski WB. 2017. Ambient fine particulate matter (PM<sub>2.5</sub>) in Canadian oil sands communities: Levels, sources and potential human health risk. *Sci Total Environ.* 595:828–838. doi:10.1016/j.scitotenv.2017.04.023.
- Bartels SF, Gendreau-Berthiaume B, Macdonald SE. 2019. The impact of atmospheric acid deposition on tree growth and forest understory vegetation in the Athabasca Oil Sands Region. *Sci Total Environ.* 696:133877. doi:10.1016/j.scitotenv.2019.133877.
- Berger RG, Aslund MW, Sanders G, Charlebois M, Knopper LD, Bresee KE. 2016. A multiple lines of evidence approach for the ecological risk assessment of an accidental bitumen release from a steam assisted gravity drainage (SAGD) well in the Athabasca oil sands region. *Sci Total Environ.* 542:495–504. doi:10.1016/j.scitotenv.2015.10.050.
- Birks SJ, Cho S, Taylor E, Yi Y, Gibson JJ. 2017. Characterizing the PAHs in surface waters and snow in the Athabasca region: Implications for identifying hydrological pathways of atmospheric deposition. *Sci Total Environ.* 603–604:570–583. doi:10.1016/j.scitotenv.2017.06.051.
- Boutin C, Carpenter DJ. 2017. Assessment of wetland/upland vegetation communities and evaluation of soil-plant contamination by polycyclic aromatic hydrocarbons and trace metals in regions near oil sands mining in Alberta. *Sci Total Environ.* 576:829-839. doi:10.1016/j.scitotenv.2016.10.062.
- Brook JR, Cober SG, Freemark M, Harner T, Li SM, Liggio J, Makar P, Pauli B. 2019. Advances in science and applications of air pollution monitoring: A case study on oil sands monitoring targeting ecosystem protection. *J Air Waste Manag Assoc.* 69(6):661–709. doi:10.1080/10962247.2019.1607689.
- Brunet ND, Jardine TD, Jones PD, Macdermid F, Reed G, Bogdan AM, Tchir DR, Natcher DC. 2020. Towards indigenous community-led monitoring of fish in the oil sands region of Canada: Lessons at the intersection of cultural consensus and fish science. *Extr Ind Soc.* 7(4):1319–1329. doi:10.1016/j.exis.2020.06.014.
- Bytnerowicz A, Hsu YM, Percy K, Legge A, Fenn ME, Schilling S, Frączek W, Alexander D. 2016. Ground-level air pollution changes during a boreal wildland mega-fire. *Sci Total Environ.* 572:755–769. doi:10.1016/j.scitotenv.2016.07.052

- Bytnerowicz, A., Frackzec, W., Schilling, S., Alexander, D. (2010). Spatial and temporal distribution of ambient nitric acid and ammonia in the Athabasca Oil Sands Region, Alberta. J. Aherne and D.P. Shaw (Guest Editors). Impacts of sulphur and nitrogen deposition in western Canada J. Limnol., 69(Suppl. 1), 11-21. doi.org/10.3274/JL10-69-S1-03
- Candler, Craig, Gibson, Ginger, Mikisew Cree First Nation. 2015. Wîyôw'tam'kitaskino (Our Land is Rich): A Mikisew Cree culture & rights assessment for the proposed Teck Frontier project update. Prepared for Mikisew Cree First Nation.
- Cash KJ, Gibbons WN, Munkittrick KR, Brown SB, Carey J. 2000. Fish health in the peace, Athabasca and slave river systems. J Aquat Ecosyst Stress Recover. 8(1):77–86. doi:10.1023/A:1011495823504.
- Charpentier AD, Bergerson JA, MacLean HL. 2009. Understanding the Canadian oil sands industry's greenhouse gas emissions. Environ Res Lett. 4(1). doi:10.1088/1748-9326/4/1/014005.
- Cheng I, Wen D, Zhang L, Wu Z, Qiu X, Yang F, Harner T. 2018. Deposition Mapping of Polycyclic Aromatic Compounds in the Oil Sands Region of Alberta, Canada and Linkages to Ecosystem Impacts. Environ Sci Technol. 52(21): 12456-12464. doi:10.1021/acs.est.8b02486
- Cheng Y, Li SM, Gordon M, Liu P. 2018. Size distribution and coating thickness of black carbon from the Canadian oil sands operations. Atmos Chem Phys. 18(4):2653–2667. doi.org/10.5194/acp-18-2653-2018
- Cheng Y, Li SM, Liggio J, Gordon M, Darlington A, Zheng Q, Moran M, Liu P, and Wolde M, 2019. Top-Down Determination of Black Carbon Emissions from Oil Sand Facilities in Alberta, Canada Using Aircraft Measurements. Environ Sci Technol. 54(1):412–418. doi:10.1021/acs.est.9b05522
- Chibwe L, Manzano CA, Muir D, Atkinson B, Kirk JL, Marvin CH, Wang X, Teixeira C, Shang D, Harner T, et al. 2019. Deposition and Source Identification of Nitrogen Heterocyclic Polycyclic Aromatic Compounds in Snow, Sediment, and Air Samples from the Athabasca Oil Sands Region. Environ Sci Technol. 53(6):2981–2989. doi:10.1021/acs.est.8b06175.
- Chibwe, L., Roberts, S., Shang, D., Yang, F., Manzano, C.A., Wang, X., Kirk, J.L. and Muir, D.C., 2020. A one-century sedimentary record of N-and S-polycyclic aromatic compounds in the Athabasca oil sands region in Canada. Chemosphere, 260, p.127641.
- Cho S, Dinwoodie G, Fu Y, Abboud S, Turchenek L. 2019. An assessment of long-term soil acidification trends in Alberta, Canada. Ecol Indic. 98(August 2018):712–722. doi:10.1016/j.ecolind.2018.11.020.
- Cho S, McEachern P, Morris R, Shah T, Johnson J, Nopmongcol U. 2012. Emission sources sensitivity study for ground-level ozone and PM2.5 due to oil sands development using air quality modeling system: Part I- model evaluation for current year base case simulation. Atmos Environ 55:533–541. doi:10.1016/j.atmosenv.2012.02.026
- Cho S, Morris R, McEachern P, Shah T, Johnson J and Nopmongcol U. 2012. Emission sources sensitivity study for ground-level ozone and PM2.5 due to oil sands development using air quality modelling system: Part II-Source apportionment modelling. Atmos Environ 55: 542–556. doi:10.1016/j.atmosenv.2012.02.025
- Cho S, Sharma K, Brassard BW, Hazewinkel R. 2014. Polycyclic aromatic hydrocarbon deposition in the snowpack of the Athabasca oil sands region of Alberta, Canada. Water Air Soil Pollut. 225(5). doi:10.1007/s11270-014-1910-4.
- Cho S, Vijayaraghavan K, Spink D, Cosic B, Davies M, Jung J. 2017. Assessing the effects of oil sands related ozone precursor emissions on ambient ozone levels in the Alberta oil sands region, Canada. Atmos Environ. 168: 62–74. http://dx.doi.org/10.1016/j.atmosenv.2017.08.062
- Cho S, Vijayaraghavan K, Spink D, Jung J, Morris R, Pauls R. 2017. Assessment of regional acidifying pollutants in the Athabasca oil sands area under different emission scenarios. Atmos Environ. 156:160–168. doi:10.1016/j.atmosenv.2017.02.038.

- Conly FM, Crosley RW, Headley J V., Quagraine EK. 2007. Assessment of metals in bed and suspended sediments in tributaries of the Lower Athabasca River. *J Environ Sci Heal - Part A Toxic/Hazardous Subst Environ Eng.* 42(8):1021–1028. doi:10.1080/10934520701418433.
- Cooke CA, Kirk JL, Muir DCG, Wiklund JA, Wang X, Gleason A, Evans MS. 2017. Spatial and temporal patterns in trace element deposition to lakes in the Athabasca oil sands region (Alberta, Canada). *Environ Res Lett.* 12(12):26. doi:10.1088/1748-9326/aa9505.
- Cruz-Martinez L, Fernie KJ, Soos C, Harner T, Getachew F, Smits JEG. 2015. Detoxification, endocrine, and immune responses of tree swallow nestlings naturally exposed to air contaminants from the Alberta oil sands. *Sci Total Environ.* 502:8-15. doi:10.1016/j.scitotenv.2014.09.008.
- Culp, J.M., Brua, R.B., Luiker, E. and Glozier, N.E., 2020. Ecological causal assessment of benthic condition in the oil sands region, Athabasca River, Canada. *Science of The Total Environment*, 749, p.141393.
- Curtis CJ, Roger F, Neil R, Shilland J, Simpson GL, Turner S, Yang H, Pla S. 2010. Palaeolimnological assessment of lake acidification and environmental change in the Athabasca Oil Sands Region, Alberta. *J Limnol.* 69(SUPPL. 1):92–104. doi:10.3274/JL10-69-S1-10.
- Davidson C and Spink D. 2018. Alternate approaches for assessing impacts of oil sands development on air quality: A case study using the First Nation Community of Fort McKay. *J Air Waste Manage Assoc* 68: 308-318. DOI: 10.1080/10962247.2017.1377648
- Davidson CJ, Foster KR, Tanna RN. 2020. Forest health effects due to atmospheric deposition: Findings from long-term forest health monitoring in the Athabasca Oil Sands Region. *Sci Total Environ.* 699:134277. doi:10.1016/j.scitotenv.2019.134277.
- Davies M, Cho S, Spink D, Pauls R, Desilets M, Shen Y, Bajwa K, Person R. 2016. An enhanced approach for the use of satellite-derived leaf area index values in dry deposition modeling in the Athabasca oil sands region. *Journal of Environmental Management.* 184:240–248. doi:10.1016/j.jenvman.2016.09.045.
- Dolgova S, Popp BN, Courtoreille K, Espie RHM, Maclean B, McMaster M, Straka JR, Tetreault GR, Wilkie S, Hebert CE. 2018. Spatial trends in a biomagnifying contaminant: Application of amino acid compound-specific stable nitrogen isotope analysis to the interpretation of bird mercury levels. *Environ Toxicol Chem.* 37(5):1466-1475. doi:10.1002/etc.4113.
- Donner MW, Bicalho B, Noernberg T, Shotyck W. 2019. Contemporary and Historical Atmospheric Deposition of Arsenic and Selenium in the Athabasca Bituminous Sands Region. *Environ Sci Technol.* 53(23):14020–14028. doi:10.1021/acs.est.9b02718.
- Donner MW, Bicalho B, Sinn C, Shotyck W. 2018. Selenium and sulphur in Athabasca bituminous sands mineral and bitumen fractions. *Fuel.* 224:718–725. doi:10.1016/j.fuel.2018.03.093.
- Donner MW, Cuss CW, Poesch M, Sinnatamby RN, Shotyck W, Siddique T. 2018. Selenium in surface waters of the lower Athabasca River watershed: Chemical speciation and implications for aquatic life. *Environ Pollut.* 243(Pt B):1343–1351. doi:10.1016/j.envpol.2018.09.067.
- Donner MW, Javed MB, Shotyck W, Francesconi KA, Siddique T. 2017. Arsenic speciation in the lower Athabasca River watershed: A geochemical investigation of the dissolved and particulate phases. *Environ Pollut.* 224:265–274.
- Droppo IG, di Cenzo P, Parrott J, Power J. 2019. The Alberta oil sands eroded bitumen/sediment transitional journey: Influence on sediment transport dynamics, PAH signatures and toxicological effect. *Sci Total Environ.* 677:718–731. doi:10.1016/j.scitotenv.2019.04.313.
- Dubé MG, Wilson JE. 2013. Accumulated state assessment of the Peace-Athabasca-Slave River system. *Integr Environ Assess Manag.* 9(3):405–425. doi:10.1002/ieam.1354.

- Eccles KM, Thomas PJ, Chan HM. 2020. Relationships between mercury concentrations in fur and stomach contents of river otter (*Lontra canadensis*) and mink (*Neovison vison*) in Northern Alberta Canada and their applications as proxies for environmental factors determining mercury bioavailability. *Environ Res.* 181:108961. doi:10.1016/j.envres.2019.108961.
- Edgerton ES, Hsu YM, White EM, Fenn ME, Landis MS. 2020. Ambient concentrations and total deposition of inorganic sulfur, inorganic nitrogen and base cations in the Athabasca Oil Sands Region. *Sci Total Environ.* 706:134864. doi:10.1016/j.scitotenv.2019.134864.
- Elmes MC, Wiklund JA, Van Opstal SR, Wolfe BB, Hall RI. 2016. Characterizing baseline concentrations, proportions, and processes controlling deposition of river-transported bitumen-associated polycyclic aromatic compounds at a floodplain lake (Slave River Delta, Northwest Territories, Canada). *Environ Monit Assess.* 188(5):1–15. doi:10.1007/s10661-016-5277-4.
- Emmerton CA, Cooke CA, Wentworth GR, Graydon JA, Ryjkov A, Dastoor A. 2018. Total Mercury and Methylmercury in Lake Water of Canada's Oil Sands Region. *Environ Sci Technol.* 52(19):10946–10955. doi:10.1021/acs.est.8b01680.
- Eng A, Harner T, Pozo K. 2013. A Prototype Passive Air Sampler for Measuring Dry Deposition of Polycyclic Aromatic Hydrocarbons. *Environ Sci Technol Lett.* 1(1):77–81. doi:10.1021/ez400044z.
- Englander JG, Brandt AR, Elgowainy A, Cai H, Han J, Yeh S, Wang MQ. 2015. Oil sands energy intensity assessment using facility-level data. *Energy & Fuels.* 29(8):5204–5212. DOI: 10.1021/acs.energyfuels.5b00175
- Evans M, Davies M, Janzen K, Muir D, Hazewinkel R, Kirk J, De Boer D. 2016. PAH distributions in sediments in the oil sands monitoring area and western Lake Athabasca: Concentration, composition and diagnostic ratios. *Environ Pollut.* 213:671–687. doi:10.1016/j.envpol.2016.03.014.
- Evans MS, McMaster M, Muir DCG, Parrott J, Tetreault GR, Keating J. 2019. Forage fish and polycyclic aromatic compounds in the Fort McMurray oil sands area: Body burden comparisons with environmental distributions and consumption guidelines. *Environ Pollut.* 255(Pt 2). doi:10.1016/j.envpol.2019.113135.
- Evans MS, Talbot A. 2012. Investigations of mercury concentrations in walleye and other fish in the Athabasca River ecosystem with increasing oil sands developments. *J Environ Monit.* 14(7):1989–2003. doi:10.1039/c2em30132f.
- Fenn ME, Bytnerowicz A, Schilling SL, Ross CS. 2015. Atmospheric deposition of nitrogen, sulfur and base cations in jack pine stands in the Athabasca Oil Sands Region, Alberta, Canada. *Environ Pollut.* 196:497–510. doi:10.1016/j.envpol.2014.08.023
- Fernie KJ, Marteinson SC, Chen D, Eng A, Harner T, Smits JEG, Soos C. 2018. Elevated exposure, uptake and accumulation of polycyclic aromatic hydrocarbons by nestling tree swallows (*Tachycineta bicolor*) through multiple exposure routes in active mining-related areas of the Athabasca oil sands region. *Sci Total Environ.* 624:250-261. doi:10.1016/j.scitotenv.2017.12.123.
- Fernie KJ, Marteinson SC, Chen D, Palace V, Peters L, Soos C, Smits JEG. 2019. Changes in thyroid function of nestling tree swallows (*Tachycineta bicolor*) in relation to polycyclic aromatic compounds and other environmental stressors in the Athabasca Oil Sands Region. *Environ Res.* 169(November 2018):464–475. doi:10.1016/j.envres.2018.11.031.
- Fernie KJ, Marteinson SC, Soos C, Chen D, Cruz-Martinez L, Smits JEG. 2018. Reproductive and developmental changes in tree swallows (*Tachycineta bicolor*) are influenced by multiple stressors, including polycyclic aromatic compounds, in the Athabasca Oil Sands. *Environ Pollut.* 238:931-941. doi:10.1016/j.envpol.2018.03.074.
- Fioletov VE, McLinden CA, Cede A, Davies J, Mihele C, Netcheva S, Li SM, O'Brien J. 2016. Sulfur dioxide (SO<sub>2</sub>) vertical column density measurements by Pandora spectrometer over the Canadian oil sands. *Atmos Meas Tech.* 9(7):2961–2976. doi:10.5194/amt-9-2961-2016



- Foster KR, Davidson C, Tanna RN, Spink D. 2019. Introduction to the virtual special issue monitoring ecological responses to air quality and atmospheric deposition in the Athabasca Oil Sands region the wood Buffalo environmental Association's Forest health monitoring program. *Sci Total Environ.* 686:345-359. doi:10.1016/j.scitotenv.2019.05.353.
- Fraser A, Dastoor A, Ryjkov A. 2018. How important is biomass burning in Canada to mercury contamination? *Atmos Chem Phys.* 18(10):7263–7286. doi:10.5194/acp-18-7263-2018.
- Galarneau E, Hollebone BP, Yang Z, Schuster J. 2014. Preliminary measurement-based estimates of PAH emissions from oil sands tailings ponds. *Atmos Environ.* 97:332–335. doi:10.1016/j.atmosenv.2014.08.038
- Glozier, N.E., Pippy, K., Levesque L., Ritcey, A., Armstrong, B., Tobin, O., Cooke, C.A., Conly, M., Dirk, L., Epp, C., Gue, A., Hazewinkel, R., Keet, E., Lindeman, D., Maines, J., Syrgiannis, J., Su, M. & V. Tumber. 2018. Surface Water Quality of the Athabasca, Peace and Slave Rivers and Riverine Waterbodies within the Peace-Athabasca Delta. Oil Sands Monitoring Program Technical Report Series No. 1.4. 64 p.
- Godwin CM, Smits JEG, Barclay RMR. 2016. Metals and metalloids in nestling tree swallows and their dietary items near oilsands mine operations in Northern Alberta. *Sci Total Environ.* 562:714-723. doi:10.1016/j.scitotenv.2016.04.069.
- Golzadeh N, Barst BD, Basu N, Baker JM, Auger JC, McKinney MA. 2020. Evaluating the concentrations of total mercury, methylmercury, selenium, and selenium:mercury molar ratios in traditional foods of the Bigstone Cree in Alberta, Canada. *Chemosphere.* 250:126285. doi:10.1016/j.chemosphere.2020.126285.
- Gopalapillai Y, Kirk JL, Landis MS, Muir DCG, Cooke CA, Gleason A, Ho A, Kelly E, Schindler D, Wang X, et al. 2019. Source Analysis of Pollutant Elements in Winter Air Deposition in the Athabasca Oil Sands Region: A Temporal and Spatial Study. *ACS Earth Sp Chem.* 3(8):1656–1668. doi:10.1021/acsearthspacechem.9b00150.
- Gopalapillai Y, Kirk JL, Landis MS, Muir DCG, Cooke CA, Gleason A, Ho A, Kelly E, Schindler D, Wang X, Lawson G. 2019. Source Analysis of Pollutant Elements in Winter Air Deposition in the Athabasca Oil Sands Region: A Temporal and Spatial Study. *ACS Earth Space Chem.* 2019, 3, 8, 1656–1668. doi:10.1021/acsearthspacechem.9b00150
- Gordon M, Li SM, Staebler R, Darlington A, Hayden K, O'Brien J, Wolde M. 2015. Determining air pollutant emission rates based on mass balance using airborne measurement data over the Alberta oil sands operations. *Atmos Meas Tech.* 8(9):3745–3765. doi:10.5194/amt-8-3745-2015
- Gordon M, Makar PA, Staebler RM, Zhang J, Akingunola A, Gong W, Li SM. 2018. A comparison of plume rise algorithms to stack plume measurements in the Athabasca oil sands. *Atmos Chem Phys.* 18(19):14695–14714. doi:10.5194/acp-18-14695-2018.
- Graney JR, Edgerton ES, Landis MS. 2019. Using Pb isotope ratios of particulate matter and epiphytic lichens from the Athabasca Oil Sands Region in Alberta, Canada to quantify local, regional, and global Pb source contributions. *Sci Total Environ.* 654:1293–1304. doi:10.1016/j.scitotenv.2018.11.047.
- Graney JR, Landis MS, Puckett KJ, Studabaker WB, Edgerton ES, Legge AH, Percy KE. 2017. Differential accumulation of PAHs, elements, and Pb isotopes by five lichen species from the Athabasca Oil Sands Region in Alberta, Canada. *Chemosphere.* 184:700–710. doi:10.1016/j.chemosphere.2017.06.036.
- Graney JR, Landis MS, Puckett KJ, Studabaker WB, Edgerton ES, Legge AH, Percy KE. 2017. Differential accumulation of PAHs, elements, and Pb isotopes by five lichen species from the Athabasca Oil Sands Region in Alberta, Canada. *Chemosphere.* 184:700–710. doi:10.1016/j.chemosphere.2017.06.036.
- Griffin D, Zhao X, McLinden CA, Boersma F, Bourassa A, Dammers E, Degenstein D, Eskes H, Fehr L, Fioletov V, et al. 2019. High-Resolution Mapping of Nitrogen Dioxide With TROPOMI: First Results and Validation Over the Canadian Oil Sands. *Geophysical Research Letters.* 46(2):1049–1060. doi:10.1029/2018GL081095.
- Guéguen C, Clarisse O, Perroud A, McDonald A. 2011. Chemical speciation and partitioning of trace metals (Cd, Co, Cu, Ni, Pb) in the lower Athabasca river and its tributaries (Alberta, Canada). *J Environ Monit.* 13(10):2865–2872. doi:10.1039/c1em10563a.

- Hall RI, Wolfe BB, Wiklund JA, Edwards TWD, Farwell AJ, Dixon DG. 2012. Has Alberta Oil Sands Development Altered Delivery of Polycyclic Aromatic Compounds to the Peace-Athabasca Delta? *PLoS One*. 7(9):9. doi:10.1371/journal.pone.0046089.
- Harner T, Rauert C, Muir D, Schuster JK, Hsu YM, Zhang L, Marson G, Watson JG, Ahad J, Cho S, et al. 2018. Air synthesis review: Polycyclic aromatic compounds in the oil sands region. *Environ Rev*. 26(4):430–468. doi:10.1139/er-2018-0039
- Headley J V., Crosley B, Conly FM, Quagraine EK. 2005. The characterization and distribution of inorganic chemicals in tributary waters of the lower Athabasca river, oilsands region, Canada. *J Environ Sci Heal - Part A Toxic/Hazardous Subst Environ Eng*. 40(1):1–27. doi:10.1081/ESE-200033418.
- Hebert CE, Campbell D, Kindopp R, MacMillan S, Martin P, Neugebauer E, Patterson L, Shatford J. 2013. Mercury trends in colonial waterbird eggs downstream of the oil sands region of Alberta, Canada. *Environ Sci Technol*. 47(20):11785–11792. doi:10.1021/es402542w.
- Hebert CE, Weseloh DVC, Macmillan S, Campbell D, Nordstrom W. 2011. Metals and polycyclic aromatic hydrocarbons in colonial waterbird eggs from Lake Athabasca and the Peace-Athabasca Delta, Canada. *Environ Toxicol Chem*. 30(5):1178–1183. doi:10.1002/etc.489.
- Howell SG, Clarke AD, Freitag S, McNaughton CS, Kapustin V, Brekovskikh V, Jimenez JL, Cubison MJ. 2014. An airborne assessment of atmospheric particulate emissions from the processing of Athabasca oil sands. *Atmos Chem Phys*. 14(10):5073–5087. doi:10.5194/acp-14-5073-2014
- Hsu YM, Bytnerowicz A, Fenn ME, Percy KE. 2016. Atmospheric dry deposition of sulfur and nitrogen in the Athabasca Oil Sands Region, Alberta, Canada. *Sci Total Environ*. 568:285–295. doi:10.1016/j.scitotenv.2016.05.205
- Hsu YM, Clair TA. 2015. Measurement of fine particulate matter water-soluble inorganic species and precursor gases in the Alberta oil sands region using an improved semicontinuous monitor. *J Air Waste Manag Assoc*. 65(4):423–435. doi:10.1080/10962247.2014.1001088.
- Hsu YM, Harner T, Li H, Fellin P. 2015. PAH Measurements in Air in the Athabasca Oil Sands Region. *Environ Sci Technol*. 49(9):5584–5592. doi:10.1021/acs.est.5b00178
- Hsu YM, Wang X, Chow JC, Watson JG, Percy KE. 2016. Collocated comparisons of continuous and filter-based PM<sub>2.5</sub> measurements at Fort McMurray, Alberta, Canada. *J Air Waste Manag Assoc*. 66(3):329–339. doi:10.1080/10962247.2015.1136362
- Hsu YM. 2013. Trends in passively-measured ozone, nitrogen dioxide and sulfur dioxide concentrations in the Athabasca Oil Sands Region of Alberta, Canada. *Aerosol Air Qual Res*. 13(5):1448–1463. doi:10.4209/aaqr.2012.08.0224
- Huang R, Mcphedran KN, Yang L, El-Din MG. 2016. Characterization and distribution of metal and nonmetal elements in the Alberta oil sands region of Canada. *Chemosphere*. 147(January):218–229. doi:10.1016/j.chemosphere.2015.12.099
- Independent Environmental Consultants (IEC). 2018. Milestone 2: Draft Report. Strategic Environmental Assessment of Wood Buffalo National Park World Heritage Site.
- Irvine GM, Blais JM, Doyle JR, Kimpe LE, White PA. 2014. Cancer risk to First Nations' people from exposure to polycyclic aromatic hydrocarbons near in-situ bitumen extraction in Cold Lake, Alberta. *Environ Heal A Glob Access Sci Source*. 13(1):1–15. doi:10.1186/1476-069X-13-7.
- Jariyasopit N, Harner T, Wu D, Williams A, Halappanavar S, Su K. 2016. Mapping Indicators of Toxicity for Polycyclic Aromatic Compounds in the Atmosphere of the Athabasca Oil Sands Region. *Environ Sci Technol*. 50(20):11282–11291. doi:10.1021/acs.est.6b02058
- Jariyasopit N, Zhang Y, Martin JW, Harner T. 2018. Comparison of polycyclic aromatic compounds in air measured by conventional passive air samplers and passive dry deposition samplers and contributions from petcoke and oil sands ore. *Atmos Chem Phys*. 18(12):9161–9171. doi:10.5194/acp-18-9161-2018.

- Jasechko S, Gibson JJ, Jean Birks S, Yi Y. 2012. Quantifying saline groundwater seepage to surface waters in the Athabasca oil sands region. *Appl Geochemistry*. 27(10):2068–2076. doi:10.1016/j.apgeochem.2012.06.007.
- Jautzy J, Ahad JME, Gobeil C, Savard MM. 2013. Century-long source apportionment of PAHs in athabasca oil sands region lakes using diagnostic ratios and compound-specific carbon isotope signatures. *Environ Sci Technol*. 47(12):6155–6163. doi:10.1021/es400642e.
- Jautzy JJ, Ahad JM, Gobeil C, Smirnoff A, Barst BD, Savard MM. 2015. Isotopic evidence for oil sands petroleum coke in the Peace-Athabasca Delta. *Environ Sci Technol*. 49(20):12062–12070.
- Jautzy JJ, Ahad JME, Gobeil C, Smirnoff A, Barst BD, Savard MM. 2015. Isotopic Evidence for Oil Sands Petroleum Coke in the Peace-Athabasca Delta. *Environ Sci Technol*. 49(20):12062–12070. doi:10.1021/acs.est.5b03232.
- Jautzy JJ, Ahad JME, Hall RI, Wiklund JA, Wolfe BB, Gobeil C, Savard MM. 2015. Source Apportionment of Background PAHs in the Peace-Athabasca Delta (Alberta, Canada) Using Molecular Level Radiocarbon Analysis. *Environ Sci Technol*. 49(15):9056–9063. doi:10.1021/acs.est.5b01490.
- Javed MB, Cuss CW, Grant-Weaver I, Shotyk W. 2017. Size-resolved Pb distribution in the Athabasca River shows snowmelt in the bituminous sands region an insignificant source of dissolved Pb. *Sci Rep*. 7(1):1–11. doi:10.1038/srep43622.
- Javed MB, Shotyk W. 2018. Estimating bioaccessibility of trace elements in particles suspended in the Athabasca River using sequential extraction. *Environ Pollut*. 240:466–474. doi:10.1016/j.envpol.2018.04.131.
- Johnson MR, Crosland BM, McEwen JD, Hager DB, Armitage JR, Karimi-Golpayegani M, Picard DJ. 2016. Estimating fugitive methane emissions from oil sands mining using extractive core samples. *Atmos Environ*. 144(July 2014):111–123. doi:10.1016/j.atmosenv.2016.08.073.
- Jung K, Chang SX, Ok YS, Arshad MA. 2013. Critical loads and H<sup>+</sup> budgets of forest soils affected by air pollution from oil sands mining in Alberta, Canada. *Atmos Environ*. 69:56–64. doi:10.1016/j.atmosenv.2012.12.010.
- Kay ML, Wiklund JA, Remmer CR, Owca TJ, Klemt WH, Neary LK, Brown K, MacDonald E, Thomson K, Vucic JM, et al. 2020. Evaluating temporal patterns of metals concentrations in floodplain lakes of the Athabasca Delta (Canada) relative to pre-industrial baselines. *Sci Total Environ*. 704:135309. doi:10.1016/j.scitotenv.2019.135309.
- Kelly EN, Schindler DW, Hodson P V., Short JW, Radmanovich R, Nielsen CC. 2010. Oil sands development contributes elements toxic at low concentrations to the Athabasca River and its tributaries. *Proc Natl Acad Sci U S A*. 107(37):16178–16183. doi:10.1073/pnas.1008754107.
- Kelly EN, Short JW, Schindler DW, Hodson P V., Ma M, Kwan AK, Fortin BL. 2009. Oil sands development contributes polycyclic aromatic compounds to the Athabasca River and its tributaries. *Proc Natl Acad Sci U S A*. 106(52):22346–22351. doi:10.1073/pnas.0912050106.
- Kirk JL, Muir DCG, Gleason A, Wang X, Lawson G, Frank RA, Lehnerr I, Wrona F. 2014. Atmospheric deposition of mercury and methylmercury to landscapes and waterbodies of the athabasca oil sands region. *Environ Sci Technol*. 48(13):7374–7383. doi:10.1021/es500986r.
- Klemt WH, Kay ML, Wiklund JA, Wolfe BB, Hall RI. 2020. Assessment of vanadium and nickel enrichment in Lower Athabasca River floodplain lake sediment within the Athabasca Oil Sands Region (Canada). *Environ Pollut*. 265:114920. doi:10.1016/j.envpol.2020.114920.
- Korosi JB, Cooke CA, Eickmeyer DC, Kimpe LE, Blais JM. 2016. In-situ bitumen extraction associated with increased petrogenic polycyclic aromatic compounds in lake sediments from the Cold Lake heavy oil fields (Alberta, Canada). *Environ Pollut*. 218:915–922. doi:10.1016/j.envpol.2016.08.032.

- Korosi JB, Irvine G, Skierszkan EK, Doyle JR, Kimpe LE, Janvier J, Blais JM. 2013. Localized enrichment of polycyclic aromatic hydrocarbons in soil, spruce needles, and lake sediments linked to in-situ bitumen extraction near Cold Lake, Alberta. *Environ Pollut.* 182:307–315. doi:10.1016/j.envpol.2013.07.012.
- Kurek J, Kirk JL, Muir DCG, Wang X, Evans MS, Smol JP. 2013. Legacy of a half century of Athabasca oil sands development recorded by lake ecosystems. *Proc Natl Acad Sci.* 110(5):1761–1766. doi:10.1073/pnas.1217675110.
- Laird KR, Das B, Hesjedal B, Leavitt PR, Mushet GR, Scott KA, Simpson GL, Wissel B, Wolfe J, Cumming BF. 2017. Paleolimnological assessment of nutrient enrichment on diatom assemblages in a priori defined nitrogen- and phosphorus-limited lakes downwind of the Athabasca Oil Sands, Canada. *J Limnol.* 76(3):488–502. doi:10.4081/jlimnol.2017.1598.
- Laird KR, Das B, Kingsbury M, Moos MT, Pla-Rabes S, Ahad JME, Wiltse B, Cumming BF. 2013. Paleolimnological assessment of limnological change in 10 lakes from northwest Saskatchewan downwind of the Athabasca oils sands based on analysis of siliceous algae and trace metals in sediment cores. *Hydrobiologia.* 720(1):55–73. doi:10.1007/s10750-013-1623-5.
- Landis MS, Edgerton ES, White EM, Wentworth GR, Sullivan AP, Dillner AM. 2018. The impact of the 2016 Fort McMurray Horse River Wildfire on ambient air pollution levels in the Athabasca Oil Sands Region, Alberta, Canada. *Sci Total Environ.* 618:1665–1676. doi:10.1016/j.scitotenv.2017.10.008
- Landis MS, Pancras JP, Graney JR, White EM, Edgerton ES, Legge A, Percy KE. 2017. Source apportionment of ambient fine and coarse particulate matter at the Fort McKay community site, in the Athabasca Oil Sands Region, Alberta, Canada. *Sci Total Environ.* 584–585:105–117. doi:10.1016/j.scitotenv.2017.01.110
- Landis MS, Studabaker WB, Pancras JP, Graney JR, White EM, Edgerton ES. 2019. Source apportionment of ambient fine and coarse particulate matter polycyclic aromatic hydrocarbons at the Bertha Ganter-Fort McKay community site in the Oil Sands Region of Alberta, Canada. *Sci Total Environ.* 666:540–558. doi:10.1016/j.scitotenv.2019.02.126.
- Landis MS, Studabaker WB, Patrick Pancras J, Graney JR, Puckett K, White EM, Edgerton ES. 2019. Source apportionment of an epiphytic lichen biomonitor to elucidate the sources and spatial distribution of polycyclic aromatic hydrocarbons in the Athabasca Oil Sands Region, Alberta, Canada. *Sci Total Environ.* 654:1241–1257. doi:10.1016/j.scitotenv.2018.11.131.
- Lavoie I, Guéguen C, Fortin C. 2011. Benthic diatom communities from rivers in close proximity to the Athabasca tar sands (Alberta, Canada). *Water Qual Res J Canada.* 46(4):355–365. doi:10.2166/wqrjc.2011.019.
- Laxton DL, Watmough SA, Aherne J, Straker J. 2010. An assessment of nitrogen saturation in *Pinus banksiana* plots in the Athabasca Oil Sands Region, Alberta. 1.:171-180. doi:10.4081/jlimnol.2010.s1.171.
- Lee AKY, Adam MG, Liggio J, Li SM, Li K, Willis MD, Abbatt JPD, Tokarek TW, Odame-Ankrah CA, Osthoff HD, et al. 2019. A large contribution of anthropogenic organo-nitrates to secondary organic aerosol in the Alberta oil sands. *Atmos Chem Phys.* 19(19):12209–12219. doi:10.5194/acp-19-12209-2019.
- Li K, Liggio J, Han C, Liu Q, Moussa SG, Lee P, Li SM. 2019b. Understanding the Impact of High-NO<sub>x</sub> Conditions on the Formation of Secondary Organic Aerosol in the Photooxidation of Oil Sand-Related Precursors. *Environ Sci Technol.* 53(24):14420–14429. doi:10.1021/acs.est.9b05404
- Li K, Liggio J, Lee P, Han C, Liu Q. 2019. Secondary organic aerosol formation from  $\alpha$ -pinene, alkanes, and oil-sands-related precursors in a new oxidation flow reactor. *Atmos Chem Phys.* 19(15):9715–9731. doi:10.5194/acp-19-9715-2019.
- Li S-M, Leithead A, Moussa SG, Liggio J, Moran MD, Wang D, Hayden K, Darlington A, Gordon M, Staebler R, et al. 2017. Differences between measured and reported volatile organic compound emissions from oil sands facilities in Alberta, Canada. *Proc Natl Acad Sci.* 114(19):E3756–E3765. doi:10.1073/pnas.1617862114

- Libera N, Summers JC, Rühland KM, Kurek J, Smol JP. 2020. Diatom assemblage changes in shallow lakes of the Athabasca Oil Sands Region are not tracking aerially deposited contaminants. *J Paleolimnol.* 64(3):257–272. doi:10.1007/s10933-020-00136-y.
- Liggio J, Li SM, Hayden K, Taha YM, Stroud C, Darlington A, Drollette BD, Gordon M, Lee P, Liu P, et al. 2016. Oil sands operations as a large source of secondary organic aerosols. *Nature.* 534(7605):91–94. doi:10.1038/nature17646
- Liggio J, Li SM, Staebler RM, Hayden K, Darlington A, Mittermeier RL, O'Brien J, McLaren R, Wolde M, Worthy D, et al. 2019. Measured Canadian oil sands CO<sub>2</sub> emissions are higher than estimates made using internationally recommended methods. *Nat Commun.* 10(1). doi:10.1038/s41467-019-09714-9.
- Liggio J, Moussa SG, Wentzell J, Darlington A, Liu P, Leithead A, Hayden K, O'Brien J, Mittermeier RL, Staebler R, et al. 2017. Understanding the primary emissions and secondary formation of gaseous organic acids in the oil sands region of Alberta, Canada. *Atmos Chem Phys.* 17: 8411–8427. doi.org/10.5194/acp-17-8411-2017
- Liggio J, Stroud CA, Wentzell J, Zhang J, Sommers J, Darlington A, Liu PSKK, Moussa SG, Leithead A, Hayden K, et al. 2017. Quantifying the Primary Emissions and Photochemical Formation of Isocyanic acid (HNCO) Downwind of Oil Sands Operations. *Environ Sci Technol.* 51(24):14462–14471. doi:10.1021/acs.est.7b04346
- Lovitt J, Rahman MM, Saraswati S, McDermid GJ, Strack M, Xu B. 2018. UAV Remote Sensing Can Reveal the Effects of Low-Impact Seismic Lines on Surface Morphology, Hydrology, and Methane (CH<sub>4</sub>) Release in a Boreal Treed Bog. *Journal of Geophysical Research: Biogeosciences.* 123(3):1117–1129.
- Lundin JI, Riffell JA, Wasser SK. 2015. Polycyclic aromatic hydrocarbons in caribou, moose, and wolf scat samples from three areas of the Alberta oil sands. *Environ Pollut.* 206:527-534. doi:10.1016/j.envpol.2015.07.035.
- Lynam MM, Dvonch JT, Barres JA, Morishita M, Legge A, Percy K. 2015. Oil sands development and its impact on atmospheric wet deposition of air pollutants to the Athabasca Oil Sands Region, Alberta, Canada. *Environ Pollut.* 206:469–478. doi:10.1016/j.envpol.2015.07.032
- Lynam, M, Dvonch, JT, Barres, J, Percy, K. 2017. Atmospheric wet deposition of mercury to the Athabasca Oil Sands Region, Alberta, Canada. *Air Qual Atmos Hlth.* 1–11. doi.org/10.1007/s11869-017-0524-6
- MacKenzie MD, Dietrich ST. 2020. Atmospheric sulfur and nitrogen deposition in the Athabasca oil sands region is correlated with foliar nutrient levels and soil chemical properties. *Sci Total Environ.* 711:134737. doi:10.1016/j.scitotenv.2019.134737.
- Makar PA, Cheung P, Zhang J, Aklilu Y, Jeffries DS, Li S-M, Akingunola A, Hayden K, Baratzedah P, Scott K, et al. 2018. Estimates of exceedances of critical loads for acidifying deposition in Alberta and Saskatchewan. *Atmos Chem Phys.*:9897–9927. doi:10.5194/acp-18-9897-2018.
- Manzano CA, Marvin C, Muir D, Harner T, Martin J, Zhang Y. 2017. Heterocyclic Aromatics in Petroleum Coke, Snow, Lake Sediments, and Air Samples from the Athabasca Oil Sands Region. *Environ Sci Technol.* 51(10):5445–5453. doi:10.1021/acs.est.7b01345.
- Manzano CA, Muir D, Kirk J, Teixeira C, Siu M, Wang X, Charland JP, Schindler D, Kelly E. 2016. Temporal variation in the deposition of polycyclic aromatic compounds in snow in the Athabasca Oil Sands area of Alberta. *Environ Monit Assess.* 188(9). doi:10.1007/s10661-016-5500-3.
- Manzano CA, Muir D, Marvin C. 2016. Separation of thia-arenes and aza-arenes from polycyclic aromatics in snowpack samples from the Athabasca oil sands region by GCxGC/ToF-MS. *Int J Environ Anal Chem.* 96(10):905–920. doi:10.1080/03067319.2016.1220007
- MCFN (Mikisew Cree First Nation). 2015. Community-based monitoring program. Polycyclic aromatic hydrocarbons (PAH) levels in the Lower Athabasca River and Peace Athabasca Delta.
- MCFN (Mikisew Cree First Nation). 2016. Written brief of the Mikisew Cree First Nation to the Standing on Environment & Sustainable Development. [Accessed 2016 May 7]. House of Commons Canada, November 15, 2016. Available from: [www.ourcommons.ca](http://www.ourcommons.ca).

- McLinden CA, Fioletov V, Boersma KF, Kharol SK, Krotkov N, Lamsal L, Makar PA, Martin R V, Veefkind JP, Yang K. 2014. Improved satellite retrievals of NO<sub>2</sub> and SO<sub>2</sub> over the Canadian oil sands and comparisons with surface measurements. *Atmos Chem Phys*. 14(7):3637–3656. doi:10.5194/acp-14-3637-2014
- McLinden CA, Fioletov V, Boersma KF, Krotkov N, Sioris CE, Veefkind JP, Yang K. 2012. Air quality over the Canadian oil sands: A first assessment using satellite observations. *Geophys Res Lett*. 39(4):1–8. doi:10.1029/2011GL050273
- McLinden CA, Fioletov V, Krotkov NA, Li C, Boersma KF, Adams C. 2016. A Decade of Change in NO<sub>2</sub> and SO<sub>2</sub> over the Canadian Oil Sands As Seen from Space. *Environ Sci Technol*. 50(1):331–337. doi:10.1021/acs.est.5b04985
- McMaster M, Parrott J, Bartlett A, Gagne F, Evans M, Tetreault G, Keith H, Gee J. 2018. Aquatic Ecosystem Health Assessment of the Athabasca River Mainstem and Series Tributaries Using Fish Health and Fish and Invertebrate Toxicological Testing. *Oil Sands Monit Progr Tech Rep Ser. No. 1.8:76 pages*.
- McMaster ME, Evans MS, Alae M, Muir DCG, Hewitt LM. 2006. Northern rivers ecosystem initiative: Distribution and effects of contaminants. *Environ Monit Assess*. 113(1–3):143–165. doi:10.1007/s10661-005-9100-x.
- McNaughton CS, Vandenberg J, Thiede P. 2019. Reanalysis of aerial deposition of metals and polycyclic aromatic compounds to snow in the Athabasca Oil Sands Region of Alberta Canada. *Sci Total Environ*. 682:692–708. doi:10.1016/j.scitotenv.2019.05.097.
- Mullan-Boudreau G, Belland R, Devito K, Noernberg T, Pelletier R, Shotyk W. 2017. Sphagnum Moss as an Indicator of Contemporary Rates of Atmospheric Dust Deposition in the Athabasca Bituminous Sands Region. *Environ Sci Technol*. 51(13):7422–7431. doi:10.1021/acs.est.6b06195.
- Mundy L.J., Bilodeau J.C., Schock D.M., Thomas P.J., Blais J.M., Pauli B.D. 2019. Using wood frog (*Lithobates sylvaticus*) tadpoles and semipermeable membrane devices to monitor polycyclic aromatic compounds in boreal wetlands in the oil sands region of northern Alberta, Canada. *Chemosphere*. 214:148-157. doi:10.1016/j.chemosphere.2018.09.034.
- Munkittrick KR, Arciszewski TJ. 2017. Using normal ranges for interpreting results of monitoring and tiering to guide future work: A case study of increasing polycyclic aromatic compounds in lake sediments from the Cold Lake oil sands (Alberta, Canada) described in Korosi et al. (2016). *Environ Pollut*. 231:1215–1222. doi:10.1016/j.envpol.2017.07.070.
- Mushet GR, Laird KR, Das B, Hesjedal B, Leavitt PR, Scott KA, Simpson GL, Wissel B, Wolfe JD, Cumming BF. 2017. Regional climate changes drive increased scaled-chrysophyte abundance in lakes downwind of Athabasca Oil Sands nitrogen emissions. *J Paleolimnol*. 58(3):419–435. doi:10.1007/s10933-017-9987-6.
- Neville LA, Patterson RT, Gammon P, Macumber AL. 2014. Relationship between ecological indicators (Arcellacea), total mercury concentrations and grain size in lakes within the Athabasca oil sands region, Alberta. *Environ Earth Sci*. 72(2):577–588. doi:10.1007/s12665-013-2979-6.
- Nimana B, Canter C, Kumar A. 2015. Energy consumption and greenhouse gas emissions in the recovery and extraction of crude bitumen from Canada's oil sands. *Appl Energy*. 143(2015):189–199. doi:10.1016/j.apenergy.2015.01.024.
- O'Brien RJ, Percy KE, Legge AH. 2012. Co-measurement of Volatile Organic and Sulfur Compounds in the Athabasca Oil Sands Region by Dual Detector Pneumatic Focusing Gas Chromatography. *Developments in Environmental Science* 11: 113-144. doi.org/10.1016/B978-0-08-097760-7.00006-8
- Ohiozebau E, Tendler B, Codling G, Kelly E, Giesy JP, Jones PD. 2017. Potential health risks posed by polycyclic aromatic hydrocarbons in muscle tissues of fishes from the Athabasca and Slave Rivers, Canada. *Environ Geochem Health*. 39(1):139–160. doi:10.1007/s10653-016-9815-3.
- Ohiozebau E, Tendler B, Hill A, Codling G, Kelly E, Giesy JP, Jones PD. 2016. Products of biotransformation of polycyclic aromatic hydrocarbons in fishes of the Athabasca/Slave river system, Canada. *Environ Geochem Health*. 38(2):577–591. doi:10.1007/s10653-015-9744-6.

- Owca TJ, Kay ML, Faber J, Remmer CR, Zabel N, Wiklund JA, Wolfe BB, Hall RI. 2020. Use of pre-industrial baselines to monitor anthropogenic enrichment of metals concentrations in recently deposited sediment of floodplain lakes in the Peace-Athabasca Delta (Alberta, Canada). *Environ Monit Assess.* 192(2):1–22. doi:10.1007/s10661-020-8067-y.
- Parajulee A, Wania F. 2014. Evaluating officially reported polycyclic aromatic hydrocarbon emissions in the Athabasca oil sands region with a multimedia fate model. *Proc Natl Acad Sci U S A.* 111(9):3344–3349. doi:10.1073/pnas.1319780111.
- Parrott JL, Marentette JR, Hewitt LM, McMaster ME, Gillis PL, Norwood WP, Kirk JL, Peru KM, Headley J V., Wang Z, et al. 2018. Meltwater from snow contaminated by oil sands emissions is toxic to larval fish, but not spring river water. *Sci Total Environ.* 625:264–274. doi:10.1016/j.scitotenv.2017.12.284.
- Parsons BG, Watmough SA, Dillon PJ, Somers KM. 2010. A bioassessment of lakes in the Athabasca Oil Sands Region, Alberta, using benthic macroinvertebrates. *J Limnol.* 69(Suppl. 1):105–117. doi:10.3274/JL10-69-S1-11.
- Parsons BG, Watmough SA, Dillon PJ, Somers KM. 2010. Relationships between lake water chemistry and benthic macroinvertebrates in the Athabasca Oil Sands Region, Alberta. *J Limnol.* 69(Suppl. 1):118–125. doi:10.3274/JL10-69-S1-12.
- Parsons MT, McLennan D, Lapalme M, Mooney C, Watt C, Mintz R. 2013. Total gaseous mercury concentration measurements at fort mcmurray, Alberta, Canada. *Atmosphere (Basel).* 4(4):472–493. doi:10.3390/atmos4040472
- Percy KE, Hansen MC, Dann T. 2012. Air Quality in the Athabasca Oil Sands Region 2011. *Developments in Environmental Science* 11: 47-91. doi.org/10.1016/B978-0-08-097760-7.00004-4
- Percy KE. 2013. Ambient air quality and linkage to ecosystems in the Athabasca oil sands, Alberta. *Geosci Can* 40(11): 182–201. doi.org/10.12789/geocanj.2013.40.014
- Percy, Jane. 2019. Harvesting Knowledge: Monitoring berries in the Athabasca Oil Sands region. <https://www12.statcan.gc.ca/census-recensement/2016/as-sa/98-200-x/2016022/98-200-x2016022-eng.cfm> [Accessed 2019 April 18]. Available from: <https://osmreport.ca/report/harvesting-knowledge/>
- Phillips-Smith C, Jeong CH, Healy RM, Dabek-Zlotorzynska E, Celo V, Brook JR, Evans G. 2017. Sources of particulate matter components in the Athabasca oil sands region: investigation through a comparison of trace element measurement methodologies. *Atmos Chem Phys.* 17(15):9435–9449. doi:10.5194/acp-17-9435-2017
- Pilote M, André C, Turcotte P, Gagné F, Gagnon C. 2018. Metal bioaccumulation and biomarkers of effects in caged mussels exposed in the Athabasca oil sands area. *Sci Total Environ.* 610–611:377–390. doi:10.1016/j.scitotenv.2017.08.023.
- Proemse BC, Mayer B, Chow JC, Watson JG. 2012. Isotopic characterization of nitrate, ammonium and sulfate in stack PM2.5 emissions in the Athabasca Oil Sands Region, Alberta, Canada. *Atmos Environ.* 60:555–563. doi:10.1016/j.atmosenv.2012.06.046
- Proemse BC, Mayer B, Fenn ME, Ross CS. 2013. A multi-isotope approach for estimating industrial contributions to atmospheric nitrogen deposition in the Athabasca oil sands region in Alberta, Canada. *Environ Pollut.* 182:80–91. doi:10.1016/j.envpol.2013.07.004
- Proemse BC, Mayer B, Fenn ME. 2012. Tracing industrial sulfur contributions to atmospheric sulfate deposition in the Athabasca oil sands region, Alberta, Canada. *Appl Geochemistry.* 27(12):2425–2434. doi:10.1016/j.apgeochem.2012.08.006
- Qiu X, Cheng I, Yang F, Horb E, Zhang L, Harner T. 2018. Emissions databases for polycyclic aromatic compounds in the Canadian Athabasca oil sands region-development using current knowledge and evaluation with passive sampling and air dispersion modelling data. *Atmos Chem Phys.* 18(5):3457–3467.

- Rauert C, Harner T, Ahad JME, Percy KE. 2020. Using tree cores to evaluate historic atmospheric concentrations and trends of polycyclic aromatic compounds in the Oil Sands region of Alberta, Canada. *Sci Total Environ.* 739: 139996. doi: 10.1016/j.scitotenv.2020.139996
- Ross MS, Pereira ADS, Fennell J, Davies M, Johnson J, Sliva L, Martin JW. 2012. Quantitative and qualitative analysis of naphthenic acids in natural waters surrounding the Canadian oil sands industry. *Environ Sci Technol.* 46(23):12796–12805. doi:10.1021/es303432u.
- Russell M, Hakami A, Makar P, Akingunola A, Zhang J, Moran M, Zheng Q. 2019. An evaluation of the efficacy of very high resolution air-quality modelling over the Athabasca oil sands region, Alberta, Canada. *Atmos Chem Phys.* 19: 4393–4417. doi:10.5194/acp-19-4393-2019
- Savard MM, Bégin C, Marion J. 2014. Modelling carbon isotopes in spruce trees reproduces air quality changes due to oil sands operations. *Ecological Indicators.* 45:1-8. doi:10.1016/j.ecolind.2014.03.005.
- Schuster JK, Harner T, Su K, Eng A, Wnorowski A, Charland JP. 2019. Temporal and Spatial Trends of Polycyclic Aromatic Compounds in Air across the Athabasca Oil Sands Region Reflect Inputs from Open Pit Mining and Forest Fires. *Environ Sci Technol Lett.* 6(3):178–183. doi:10.1021/acs.estlett.9b00010.
- Schuster JK, Harner T, Su K, Mihele C, Eng A. 2015. First Results from the Oil Sands Passive Air Monitoring Network for Polycyclic Aromatic Compounds. *Environ Sci Technol.* 49(5):2991–2998. doi:10.1021/es505684e
- Seitz NE, Westbrook CJ, Dubé MG, Squires AJ. 2013. Assessing large spatial scale landscape change effects on water quality and quantity response in the lower Athabasca River basin. *Integr Environ Assess Manag.* 9(3):392–404. doi:10.1002/ieam.1336.
- Shephard MW, McLinden CA, Cady-Pereira KE, Luo M, Moussa SG, Leithead A, Liggio J, Staebler RM, Akingunola A, Makar P, et al. 2015. Tropospheric Emission Spectrometer (TES) satellite observations of ammonia, methanol, formic acid, and carbon monoxide over the Canadian oil sands: Validation and model evaluation. *Atmos Meas Tech.* doi:10.5194/amt-8-5189-2015
- Shotyk W, Appleby PG, Bicalho B, Davies L, Froese D, Grant-Weaver I, Krachler M, Maignan G, Mullan-Boudreau G, Noernberg T, et al. 2016. Peat bogs in northern Alberta, Canada reveal decades of declining atmospheric Pb contamination. *Geophys Res Lett.* 43(18):9964–9974. doi:10.1002/2016GL070952.
- Shotyk W, Belland R, Duke J, Kempton H, Krachler M, Noernberg T, Pelletier R, Vile MA, Wieder K, Zaccone C, et al. 2014. Sphagnum mosses from 21 ombrotrophic bogs in the Athabasca bituminous sands region show no significant atmospheric contamination of "heavy metals." *Environ Sci Technol.* 48(21):12603–12611. doi:10.1021/es503751v.
- Shotyk W, Bicalho B, Cuss CW, Donner MW, Grant-Weaver I, Haas-Neill S, Javed MB, Krachler M, Noernberg T, Pelletier R, et al. 2017. Trace metals in the dissolved fraction (< 0.45 µm) of the lower Athabasca River: Analytical challenges and environmental implications. *Sci Total Environ.* 580:660–669. doi:10.1016/j.scitotenv.2016.12.012.
- Shotyk W, Bicalho B, Cuss CW, Duke MJM, Noernberg T, Pelletier R, Steinnes E, Zaccone C. 2016. Dust is the dominant source of "heavy metals" to peat moss (*Sphagnum fuscum*) in the bogs of the Athabasca Bituminous Sands region of northern Alberta. *Environ Int.* 92–93:494–506. doi:10.1016/j.envint.2016.03.018.
- Shotyk W, Bicalho B, Cuss CW, Grant-Weaver I, Nagel A, Noernberg T, Poesch M, Sinnatamby NR. 2019. Bioaccumulation of Tl in otoliths of Trout-perch (*Percopsis omiscomaycus*) from the Athabasca River, upstream and downstream of bitumen mining and upgrading. *Sci Total Environ.* 650:2559–2566. doi:10.1016/j.scitotenv.2018.09.318.
- Shotyk, W. and Cuss, C.W., 2019. Atmospheric Hg accumulation rates determined using Sphagnum moss from ombrotrophic (rain-fed) bogs in the Athabasca Bituminous Sands region of northern Alberta, Canada. *Ecological Indicators*, 107, p.105626.



Simpson IJ, Blake NJ, Barletta B, Diskin GS, Fuelberg HE, Gorham K, Huey LG, Meinardi S, Rowland FS, Vay SA, et al. 2010. Characterization of trace gases measured over Alberta oil sands mining operations: 76 speciated C<sub>2</sub>–C<sub>10</sub> volatile organic compounds (VOCs), CO<sub>2</sub>, CH<sub>4</sub>, CO, NO, NO<sub>x</sub>. *Atmos Chem Phys* 10(23):11931–11954. doi:10.5194/acp-10-11931-2010.

Sioris CE, McLinden CA, Shephard MW, Fioletov VE, Abboud I. 2017. Assessment of the aerosol optical depths measured by satellite-based passive remote sensors in the Alberta oil sands region. *Atmos Chem Phys*. 17(3):1931–1943. doi:10.5194/acp-17-1931-2017

Skierszkan EK, Irvine G, Doyle JR, Kimpe LE, Blais JM. 2013. Is there widespread metal contamination from in-situ bitumen extraction at Cold Lake, Alberta heavy oil field? *Sci Total Environ*. 447:337–344. doi:10.1016/j.scitotenv.2012.12.097.

Small CC, Cho S, Hashisho Z, Ulrich AC. 2015. Emissions from oil sands tailings ponds: Review of tailings pond parameters and emission estimates. *J Pet Sci Eng*. 127:490–501. doi:10.1016/j.petrol.2014.11.020

Squires AJ, Dubé MG. 2013. Development of an effects-based approach for watershed scale aquatic cumulative effects assessment. *Integr Environ Assess Manag*. 9(3):380–391. doi:10.1002/ieam.1352.

Stachiw S, Bicalho B, Grant-Weaver I, Noernberg T, Shotyk W. 2019. Trace elements in berries collected near upgraders and open pit mines in the Athabasca Bituminous Sands Region (ABSR): Distinguishing atmospheric dust deposition from plant uptake. *Sci Total Environ*. 670:849–864. doi:10.1016/j.scitotenv.2019.03.238.

Strack M, Hayne S, Lovitt J, McDermid GJ, Rahman MM, Saraswati S, Xu B. 2019. Petroleum exploration increases methane emissions from northern peatlands. *Nature Communications*. 10(1):2804. doi:10.1038/s41467-019-10762-4.

Stroud CA, Makar PA, Zhang J, Moran MD, Akingunola A, Li SM, Leithead A, Hayden K, Siu M. 2018. Improving air quality model predictions of organic species using measurement-derived organic gaseous and particle emissions in a petrochemical-dominated region. *Atmos Chem Phys*. 18(18):13531–13545. doi:10.5194/acp-18-13531-2018.

Studabaker WB, Krupa S, Jayanty RKM, Raymer JH. 2012. Measurement of Polynuclear Aromatic Hydrocarbons (PAHs) in Epiphytic Lichens for Receptor Modeling in the Athabasca Oil Sands Region (AOSR): A Pilot Study.

Studabaker WB, Puckett KJ, Percy KE, Landis MS. 2017. Determination of polycyclic aromatic hydrocarbons, dibenzothiophene, and alkylated homologs in the lichen *Hypogymnia physodes* by gas chromatography using single quadrupole mass spectrometry and time-of-flight mass spectrometry. *J Chromatogr A*. 1492:106–116. doi:10.1016/j.chroma.2017.02.051.

Summers JC, Kurek J, Kirk JL, Muir DCG, Wang X, Wiklund JA, Cooke CA, Evans MS, Smol JP. 2016. Recent warming, rather than industrial emissions of bioavailable nutrients, is the dominant driver of lake primary production shifts across the Athabasca Oil Sands Region. *PLoS One*. 11(5). doi:10.1371/journal.pone.0153987.

Sun C, Shotyk W, Cuss CW, Donner MW, Fennell J, Javed M, Noernberg T, Poesch M, Pelletier R, Sinnatamby N, et al. 2017. Characterization of Naphthenic Acids and Other Dissolved Organics in Natural Water from the Athabasca Oil Sands Region, Canada. *Environ Sci Technol*. 51(17):9524–9532. doi:10.1021/acs.est.7b02082.

Tendler B, Ohiozebau E, Codling G, Giesy JP, Jones PD. 2020. Concentrations of Metals in Fishes from the Athabasca and Slave Rivers of Northern Canada. *Environ Toxicol Chem*. 39(11):2180–2195. doi:10.1002/etc.4852.

Tetreault GR, McMaster ME, Dixon DG, Parrott JL. 2003. Using reproductive endpoints in small forage fish species to evaluate the effects of Athabasca Oil Sands activities. *Environ Toxicol Chem*. 22(11):2775–2782. doi:10.1897/03-7.

- Thomas PJ, Eccles KM, Mundy LJ. 2017. Spatial modelling of non-target exposure to anticoagulant rodenticides can inform mitigation options in two boreal predators inhabiting areas with intensive oil and gas development. *Biol Conserv.* 212:111–119. doi:10.1016/j.biocon.2017.06.005.
- Thomas PJ, Newell EE, Eccles K, Holloway AC, Idowu I, Xia Z, Hassan E, Tomy G, Quenneville C. 2021. Co-exposures to trace elements and polycyclic aromatic compounds (PACs) impacts North American river otter (*Lontra canadensis*) baculum. *Chemosphere.* 265:128920. doi:10.1016/j.chemosphere.2020.128920.
- Timoney KP, Lee P. 2009. Does the Alberta Tar Sands Industry Pollute? The Scientific Evidence. *Open Conserv Biol J.* 3(1):65–81. doi:10.2174/1874839200903010065.
- Timoney KP, Lee P. 2011. Polycyclic aromatic hydrocarbons increase in athabasca river delta sediment: Temporal trends and environmental correlates. *Environ Sci Technol.* 45(10):4278–4284. doi:10.1021/es104375d.
- Tokarek TW, Odame-Ankrah CA, Huo JA, McLaren R, Lee AKY, Adam MG, Willis MD, Abbatt JPD, Mihele C, Darlington A, et al. 2018. Principal component analysis of summertime ground site measurements in the Athabasca oil sands with a focus on analytically unresolved intermediate-volatility organic compounds. *Atmos Chem Phys.* 18(24):17819–17841. doi:10.5194/acp-18-17819-2018.
- UNESCO (United Nations Educational, Scientific and Cultural Organization). 2017. World Heritage Centre. International Union for Conservation. Mission Report. Reactive Monitoring Mission to Wood Buffalo National Park, Canada [Mission Report].
- Vijayaraghavan K, Cho S, Morris R, Spink D, Jung J, Pauls R, Duffett K. 2016. Photochemical model evaluation of the ground-level ozone impacts on ambient air quality and vegetation health in the Alberta oil sands region: Using present and future emission scenarios. *Atmos Environ.* 141:209–218. doi:10.1016/j.atmosenv.2016.06.053
- Vile MA, Kelman Wieder R, Živković T, Scott KD, Vitt DH, Hartsock JA, Iosue CL, Quinn JC, Petix M, Fillingim HM, et al. 2014. N<sub>2</sub>-fixation by methanotrophs sustains carbon and nitrogen accumulation in pristine peatlands. *Biogeochemistry.* 121(2):317–328. doi:10.1007/s10533-014-0019-6.
- Wang X, Chow JC, Kohl SD, Percy KE, Legge AH, Watson JG. 2015. Characterization of PM<sub>2.5</sub> and PM<sub>10</sub> fugitive dust source profiles in the Athabasca Oil Sands Region. *J Air Waste Manage Assoc.* 65(12):1421–1433. doi:10.1080/10962247.2015.1100693
- Wang X, Chow JC, Kohl SD, Percy KE, Legge AH, Watson JG. 2016. Real-world emission factors for Caterpillar 797B heavy haulers during mining operations. *Particuology.* 28: 22–30. doi:10.1016/j.partic.2015.07.001
- Wang X, Chow JC, Kohl SD, Yatavelli LNR, Percy KE, Legge AH, Watson JG. 2015. Wind erosion potential for fugitive dust sources in the Athabasca Oil Sands Region. *Aeolian Res.* 18:121–134. doi:10.1016/j.aeolia.2015.07.004
- Wang XL, Watson JG, Chow JC, Kohl SD, Chen LWA, Sodeman DA, Legge AH, Percy KE. 2012. Measurement of Real-World Stack Emissions with a Dilution Sampling System. In: *Developments in Environmental Science.* Vol. 11. Elsevier: 11. p. 171–192.
- Wang Z, Yang C, Parrott JL, Frank RA, Yang Z, Brown CE, Hollebone BP, Landriault M, Fieldhouse B, Liu Y, et al. 2014. Forensic source differentiation of petrogenic, pyrogenic, and biogenic hydrocarbons in Canadian oil sands environmental samples. *J Hazard Mater.* 271:166–177. doi:10.1016/j.jhazmat.2014.02.021.
- Watmough SA, Bird A, McDonough A, Grimm E. 2019. Forest Fertilization Associated with Oil Sands Emissions. *Ecosystems.* 22(1):1–14. doi:10.1007/s10021-018-0249-x.
- Watmough SA, Whitfield CJ, Fenn ME. 2014. The importance of atmospheric base cation deposition for preventing soil acidification in the Athabasca Oil Sands Region of Canada. *Sci Total Environ.* 493:1–11. doi:10.1016/j.scitotenv.2014.05.110

- Watson JG, Chow JC, Wang XL, Kohl SD, Chen LWA, Etyemezian V. 2012. Overview of real-world emission characterization methods. *Dev Environ Sci.* 11:145–170. doi:10.1016/B978-0-08-097760-7.00007-X
- Wayland M, Headley J V., Peru KM, Crosley R, Brownlee BG. 2008. Levels of polycyclic aromatic hydrocarbons and dibenzothiophenes in wetland sediments and aquatic insects in the oil sands area of Northeastern Alberta, Canada. In: *Environmental Monitoring and Assessment*. Vol. 136. Environ Monit Assess. p. 167–182.
- WBEA, 2014. Fort McKay Berry Focus Group Video. Available: <https://www.youtube.com/watch?v=F5pl6uPHJPc&t=657s>
- Wentworth GR, Aklilu Y-A, Landis MS, Hsu YM. 2018. Impacts of a large boreal wildfire on ground level atmospheric concentrations of PAHs, VOCs and ozone. *Atmos Environ.* 178(December 2017):19–30. doi:10.1016/j.atmosenv.2018.01.013.
- Whaley CH, Makar PA, Shephard MW, Zhang L, Zhang J, Zheng Q, Akingunola A, Wentworth GR, Murphy JG, Kharol SK, et al. 2018. Contributions of natural and anthropogenic sources to ambient ammonia in the Athabasca Oil Sands and north-western Canada. *Atmos Chem Phys.* 18:2011–2034. doi.org/10.5194/acp-18-2011-2018.
- Whitfield CJ, Aherne J, Watmough SA. 2009. Modeling soil acidification in the athabasca oil sands region, Alberta, Canada. *Environ Sci Technol.* 43(15):5844–5850. doi:10.1021/es9005652.
- Wieder RK, Vile MA, Albright CM, Scott KD, Vitt DH, Quinn JC, Burke-Scoll M. 2016. Effects of altered atmospheric nutrient deposition from Alberta oil sands development on Sphagnum fuscum growth and C, N and S accumulation in peat. *Biogeochemistry.* 129(1–2):1–19. doi:10.1007/s10533-016-0216-6.
- Wieder RK, Vile MA, Scott KD, Albright CM, McMillen KJ, Vitt DH, Fenn ME. 2016. Differential Effects of High Atmospheric N and S Deposition on Bog Plant/Lichen Tissue and Porewater Chemistry across the Athabasca Oil Sands Region. *Environ Sci Technol.* 50(23):12630–12640. doi:10.1021/acs.est.6b03109.
- Wieder RK, Vitt DH, Burke-Scoll M, Scott KD, House M, Vile MA. 2010. Nitrogen and sulphur deposition and the growth of Sphagnum fuscum in bogs of the Athabasca Oil Sands Region, Alberta. *J Limnol.* 69(SUPPL. 1):161–170. doi:10.3274/JL10-69-S1-16.
- Wieder RK, Vitt DH, Vile MA, Graham JA, Hartsock JA, Fillingim H, House M, Quinn JC, Scott KD, Petix M, et al. 2019. Experimental nitrogen addition alters structure and function of a boreal bog: critical load and thresholds revealed. *Ecol Monogr.* 89(3):e01371. doi:10.1002/ecm.1371.
- Wieder RK, Vitt DH, Vile MA, Graham JA, Hartsock JA, Popma JMA, Fillingim H, House M, Quinn JC, Scott KD, et al. 2020. Experimental nitrogen addition alters structure and function of a boreal poor fen: Implications for critical loads. *Sci Total Environ.* 733:138619. doi:10.1016/j.scitotenv.2020.138619.
- Wiklund JA, Hall RI, Wolfe BB, Edwards TWD, Farwell AJ, Dixon DG. 2012. Has Alberta oil sands development increased far-field delivery of airborne contaminants to the Peace-Athabasca Delta? *Sci Total Environ.* 433:379–382. doi:10.1016/j.scitotenv.2012.06.074.
- Wiklund JA, Hall RI, Wolfe BB, Edwards TWD, Farwell AJ, Dixon DG. 2014. Use of pre-industrial floodplain lake sediments to establish baseline river metal concentrations downstream of Alberta oil sands: A new approach for detecting pollution of rivers. *Environ Res Lett.* 9(12):12. doi:10.1088/1748-9326/9/12/124019.
- Willis CE, Kirk JL, St Louis VL, Lehnher I, Ariya PA, Rangel-Alvarado RB. 2018. Sources of Methylmercury to Snowpacks of the Alberta Oil Sands Region: A Study of in Situ Methylation and Particulates. *Environ Sci Technol.* 52(2):531–540. doi:10.1021/acs.est.7b04096.
- Wnorowski A, Charland JP. 2017. Profiling quinones in ambient air samples collected from the Athabasca region (Canada). *Chemosphere.* 189:55–66. doi:10.1016/j.chemosphere.2017.09.003
- Wnorowski A. 2017. Characterization of the ambient air content of parent polycyclic aromatic hydrocarbons in the Fort McKay region (Canada). *Chemosphere.* 174(3):371–379. doi:10.1016/j.chemosphere.2017.01.114

- Wood Buffalo Environmental Association (WEBA) 2014. Community odour monitoring project. Annual Report 2013-2014. No: 1410\_20898\_01\_03. [internet]. [Accessed 2019 May 22]. Available from: <https://wbea.org/resources/reports-publications/>
- Wood Buffalo Environmental Association (WEBA) 2015. Community odour monitoring project. Annual Report 2014-2015. No: 1410\_20898\_02\_01. [internet]. [Accessed 2019 May 21]. Available from: <https://wbea.org/resources/reports-publications/>
- Wren SN, Mihele CM, Lu G, Jiang Z, Wen D, Hayden K, Mittermeier RL, Staebler RM, Cober SG, Brook JR. 2020. Improving Insights on Air Pollutant Mixtures and Their Origins by Enhancing Local Monitoring in an Area of Intensive Resource Development. *Environ Sci Technol*. 54(23):14936-14945. doi: <https://doi.org/10.1021/acs.est.0c06055>
- Yang C, Wang Z, Yang Z, Hollebhone B, Brown CE, Landriault M, Fieldhouse B. 2011. Chemical fingerprints of Alberta oil sands and related petroleum products. *Environ Forensics*. 12(2):173–188. doi:10.1080/15275922.2011.574312.
- You Y, Moussa S, Zhang L, Fu L, Beck J, Staebler R. 2020b. Quantifying fugitive gas emissions from an oil sands tailings pond with open-path FTIR measurements. *Atmos Meas Tech Discuss*.(Aug):1–24. doi.org/10.5194/amt-2020-257
- You Y, Staebler R, Moussa S, Beck J, Mittermeier R. 2020a. Methane emissions from an oil sands tailings pond: A quantitative comparison of fluxes derived by different methods. *Atmos Meas Tech Discuss*.(May):1–24. doi:10.5194/amt-2020-116.
- Young RF, Michel LM, Fedorak PM. 2011. Distribution of naphthenic acids in tissues of laboratory-exposed fish and in wild fishes from near the Athabasca oil sands in Alberta, Canada. *Ecotoxicol Environ Saf*. 74(4):889–896. doi:10.1016/j.ecoenv.2010.12.009.
- Young RF, Wismer W V., Fedorak PM. 2008. Estimating naphthenic acids concentrations in laboratory-exposed fish and in fish from the wild. *Chemosphere*. 73(4):498–505. doi:10.1016/j.chemosphere.2008.06.040.
- Zhang J, Moran MD, Zheng Q, Makar PA, Baratzadeh P, Marson G, Liu P, Li S-M. 2018. Emissions preparation and analysis for multiscale air quality modelling over the Athabasca Oil Sands Region of Alberta, Canada. *Atmos. Chem. Phys*. 18: 10459-10481. <https://doi.org/10.5194/acp-18-10459-2018>
- Zhang L, Cheng I, Muir D, Charland JP. 2015. Scavenging ratios of polycyclic aromatic compounds in rain and snow in the Athabasca oil sands region. *Atmos Chem Phys*. 15(3):1421–1434. doi:10.5194/acp-15-1421-2015
- Zhang L, Cheng I, Muir D, Charland JP. 2015. Scavenging ratios of polycyclic aromatic compounds in rain and snow in the Athabasca oil sands region. *Atmos Chem Phys*. 15(3):1421–1434. doi:10.5194/acp-15-1421-2015.
- Zhang L, Cheng I, Wu Z, Harner T, Schuster J, Charland J-P, Muir D, Parnis JM. 2015. Dry deposition of polycyclic aromatic compounds to various land covers in the Athabasca oil sands region. *J Adv Model Earth Syst*. 10:1–25. doi:10.1002/2017MS001065
- Zhang L, Cho S, Hashisho Z, Brown C. 2019. Quantification of fugitive emissions from an oil sands tailings pond by eddy covariance. *Fuel*. 237(September 2018):457–464. doi:10.1016/j.fuel.2018.09.104.
- Zhang Y, Shotyk W, Zaccone C, Noernberg T, Pelletier R, Bicalho B, Froese DG, Davies L, Martin JW. 2016. Airborne Petcoke Dust is a Major Source of Polycyclic Aromatic Hydrocarbons in the Athabasca Oil Sands Region. *Environ Sci Technol*. 50(4):1711–1720. doi:10.1021/acs.est.5b05092.
- Zurawell, Ron, Adams, Rebekah, Emmerton, Craig. 2019. Wabasca Lake monitoring project results report. Government of Alberta, Ministry of Environment and Parks. [Accessed 2019 March 25]. Available from: <https://open.alberta.ca/publications/north-wabasca-lake-monitoring-project>

## Elimination of streams, wetlands, and lakes

---

Alexander AC, Levenstein B, Sanderson LA, Blukacz-Richards EA, Chambers PA. 2020. How does climate variability affect water quality dynamics in Canada's oil sands region? *Sci Total Environ.* 732:139062. doi:10.1016/j.scitotenv.2020.139062.

## Increased human access

---

Wasser SK, Keim JL, Taper ML, Lele SR. 2011. The influences of wolf predation, habitat loss, and human activity on caribou and moose in the Alberta oil sands. *Frontiers in Ecology and the Environment.* 9(10):546-551. doi:10.1890/100071.

## Land deformation

---

Singhroy V, Li J, Samsonov S, Shen L, Pearse J. 2014. InSAR monitoring of surface deformation induced by steam injection in the Athabasca oil sands, Canada. In: 2014 IEEE Geoscience and Remote Sensing Symposium. IEEE. p. 4796-4799.

Stevenson CJ, Filicetti AT, Nielsen SE. 2019. High precision altimeter demonstrates simplification and depression of microtopography on seismic lines in treed peatlands. *Forests.* 10(4):295. doi:10.3390/f10040295.

## Noise

---

Candler, Craig, Gibson, Ginger, Mikisew Cree First Nation. 2015. Wîyôw'tam'kitaskino (Our Land is Rich): A Mikisew Cree culture & rights assessment for the proposed Teck Frontier project update. Prepared for Mikisew Cree First Nation.

Shonfield J, Bayne E. 2017. The effect of industrial noise on owl occupancy in the boreal forest at multiple spatial scales. *Avian Conservation and Ecology.* 12(2). doi:10.5751/ACE-01042-120213.

Shonfield J, Bayne EM. 2019. Effects of industrial disturbance on abundance and activity of small mammals. *Can J Zool.* 97(11):1013–1020. doi:10.1139/cjz-2019-0098.

## Surface water diversions and withdrawals

---

UNESCO (United Nations Educational, Scientific and Cultural Organization). 2017. World Heritage Centre. International Union for Conservation. Mission Report. Reactive Monitoring Mission to Wood Buffalo National Park, Canada [Mission Report].

## Vegetation and soil removal

---

- Abib TH, Chasmer L, Hopkinson C, Mahoney C, Rodriguez LCE. 2019. Seismic line impacts on proximal boreal forest and wetland environments in Alberta. *Sci Total Environ.* 658:1601–1613. doi:10.1016/j.scitotenv.2018.12.244.
- Arienti MC, Cumming SG, Krawchuk MA, Boutin S. 2009. Road network density correlated with increased lightning fire incidence in the Canadian western boreal forest. *Int J Wildl Fire.* 18(8):970. doi:10.1071/wf08011.
- Ball J, Sólymos P, Schmiegelow F, Hache S, Schieck J, Bayne E. 2016. Regional habitat needs of a nationally listed species, Canada Warbler (*Cardellina canadensis*), in Alberta, Canada. *Avian Conservation and Ecology.* 11(2):10. doi:10.5751/ACE-00916-110210.
- Cadieux P, Boulanger Y, Cyr D, Taylor AR, Price DT, Sólymos P, Stralberg D, Chen H, Brecka A, Tremblay JA. 2020. Projected effects of climate change on boreal bird community accentuated by anthropogenic disturbances in western boreal forest, Canada. *Divers Distrib.*:1–15. doi:10.1111/ddi.13057.
- Cameron EK, Bayne EM. 2009. Road age and its importance in earthworm invasion of northern boreal forests. *J Appl Ecol.* 46(1):28-36. doi:10.1111/j.1365-2664.2008.01535.x.
- Candler, Craig, Gibson, Ginger, Mikisew Cree First Nation. 2015. Wíyôw'tam'kitaskino (Our Land is Rich): A Mikisew Cree culture & rights assessment for the proposed Teck Frontier project update. Prepared for Mikisew Cree First Nation.
- Dawe CA, Filicetti AT, Nielsen SE. 2017. Effects of linear disturbances and fire severity on velvet leaf blueberry abundance, vigor, and berry production in recently burned jack pine forests. *Forests.* 8(10):398. doi:10.3390/f8100398.
- Dawe KL, Bayne EM, Boutin S. 2014. Influence of climate and human land use on the distribution of white-tailed deer (*Odocoileus virginianus*) in the western boreal forest. *Can J Zool.* 92(4):353-363. doi:10.1139/cjz-2013-0262.
- Dawe KL, Boutin S. 2016. Climate change is the primary driver of white-tailed deer (*Odocoileus virginianus*) range expansion at the northern extent of its range; land use is secondary. *Ecol Evol.* 6(18):6435-6451. doi:10.1002/ece3.2316.
- Dickie M, McNay SR, Sutherland GD, Cody M, Avgar T. 2020. Corridors or risk? Movement along, and use of, linear features varies predictably among large mammal predator and prey species. *J Anim Ecol.* 89(2):623–634. doi:10.1111/1365-2656.13130.
- Dickie M, Serrouya R, DeMars C, Cranston J, Boutin S. 2017. Evaluating functional recovery of habitat for threatened woodland caribou. *Ecosphere.* 8(9):e01936. doi:10.1002/ecs2.1936.
- Dickie M, Serrouya R, McNay RS, Boutin S. 2017. Faster and farther: wolf movement on linear features and implications for hunting behaviour. du Toit J, editor. *J Appl Ecol.* 54(1):253-263. doi:10.1111/1365-2664.12732.
- Domahidi Z, Shonfield J, Nielsen SE, Spence JR, Bayne EM. 2019. Spatial distribution of the boreal owl and northern saw-whet owl in the Boreal region of Alberta, Canada. *Avian Conserv Ecol.* 14(2). doi:10.5751/ACE-01445-140214.
- Fisher JT, Burton AC, Nolan L, Roy L. 2020. Influences of landscape change and winter severity on invasive ungulate persistence in the Nearctic boreal forest. *Sci Rep.* 10(1):1–11. doi:10.1038/s41598-020-65385-3.
- Fisher JT, Burton AC. 2018. Wildlife winners and losers in an oil sands landscape. *Frontiers in Ecology and the Environment.* 16(6):323-328. doi:10.1002/fee.1807.

- Foster KR, Godwin CM, Pyle P, Saracco JF. 2017. Reclamation and habitat-disturbance effects on landbird abundance and productivity indices in the oil sands region of northeastern Alberta, Canada. *Restoration Ecology*. 25(4):532-538. doi:10.1111/rec.12478.
- Hedley RW, McLeod LJ, Yip DA, Farr D, Knaga P, Drake KL, Bayne E. 2020. Modeling the occurrence of the yellow rail (*Coturnicops noveboracensis*) in the context of ongoing resource development in the oil sands region of Alberta. *Avian Conserv Ecol*. 15(1):1–14. doi:10.5751/ACE-01538-150110.
- Kansas J, Charlebois M, Skatter H. 2015. Vegetation recovery on low impact seismic lines in Alberta's oil sands and visual obstruction of wolves and woodland caribou. *Can Wildl Biol Manag*. 4(2):137–149.
- Latham ADM, Latham MC, Boyce MS, Boutin S. 2011. Movement responses by wolves to industrial linear features and their effect on woodland caribou in northeastern Alberta. *Ecol Appl*. 21(8):2854-2865. doi:10.1890/11-0666.1.
- Latham ADM, Latham MC, Boyce MS, Boutin S. 2013. Spatial relationships of sympatric wolves (*Canis lupus*) and coyotes (*C. latrans*) with woodland caribou (*Rangifer tarandus caribou*) during the calving season in a human-modified boreal landscape. *Wildl Res*. 40(3):250-260. doi:10.1071/WR12184.
- Latham ADM, Latham MC, Boyce MS. 2011. Habitat selection and spatial relationships of black bears (*Ursus americanus*) with woodland caribou (*Rangifer tarandus caribou*) in northeastern Alberta. *Can J Zool*. 89(4):267-277. doi:10.1139/z10-115.
- Latifovic R, Pouliot D. 2014. Monitoring cumulative long-term vegetation changes over the Athabasca Oil Sands region. *IEEE J Sel Top Appl Earth Obs Remote Sens*. 7(8):3380-3392. doi:10.1109/JSTARS.2014.2321058.
- Mahon CL, Holloway G, Sóllymos P, Cumming SG, Bayne EM, Schmiegelow FKA, Song SJ. 2016. Community structure and niche characteristics of upland and lowland western boreal birds at multiple spatial scales. *Forest Ecology and Management*. 361:99-116. doi:10.1016/j.foreco.2015.11.007.
- Mahon CL, Holloway GL, Bayne EM, Toms JD. 2019 May 23. Additive and interactive cumulative effects on boreal landbirds: winners and losers in a multi-stressor landscape. *Ecol Appl*.:e01895. doi:10.1002/eap.1895.
- Mao L, Dennett J, Bater CW, Tompalski P, Coops NC, Farr D, Kohler M, White B, Stadt JJ, Nielsen SE. 2018. Using airborne laser scanning to predict plant species richness and assess conservation threats in the oil sands region of Alberta's boreal forest. *For Ecol Manage*. 409:29–37. doi:10.1016/j.foreco.2017.11.017.
- Mayor SJ, Boutin S, He F, Cahill JF. 2015. Limited impacts of extensive human land use on dominance, specialization, and biotic homogenization in boreal plant communities. *BMC Ecology*. 15(1):5. doi:10.1186/s12898-015-0037-9.
- Mayor SJ, Cahill JF, He F, Sóllymos P, Boutin S. 2012. Regional boreal biodiversity peaks at intermediate human disturbance. *Nat Commun*. 3:1142. doi:10.1038/ncomms2145.
- Morissette JL, Bayne EM, Kardynal KJ, Hobson KA. 2019. Regional variation in responses of wetland-associated bird communities to conversion of boreal forest to agriculture. *Avian Conserv Ecol*. 14(1). doi:10.5751/ACE-01355-140112.
- Neilson EW, Boutin S. 2017. Human disturbance alters the predation rate of moose in the Athabasca oil sands. *Ecosphere*. 8(8):e01913. doi:10.1002/ecs2.1913.
- Riva F, Acorn JH, Nielsen SE. 2018. Narrow anthropogenic corridors direct the movement of a generalist boreal butterfly. *Biol Lett*. 14(2):20170770. doi:10.1098/rsbl.2017.0770.
- Riva F, Acorn JH, Nielsen SE. 2018a. Distribution of Cranberry Blue Butterflies (*Agriades optilete*) and Their Responses to Forest Disturbance from In Situ Oil Sands and Wildfires. *Diversity*. 10(4). doi:10.3390/d10040112.

- Riva F, Acorn JH, Nielsen SE. 2018b. Localized disturbances from oil sands developments increase butterfly diversity and abundance in Alberta's boreal forests. *Biological Conservation*. 217:173-180. doi:10.1016/j.biocon.2017.10.022.
- Riva F, Pinzon J, Acorn JH, Nielsen SE. 2020. Composite Effects of Cutlines and Wildfire Result in Fire Refuges for Plants and Butterflies in Boreal Treed Peatlands. *Ecosystems*. 23(3):485–497. doi:10.1007/s10021-019-00417-2.
- Roberts D, Ciuti S, Barber QE, Willier C, Nielsen SE. 2018. Accelerated seed dispersal along linear disturbances in the Canadian oil sands region. *Scientific Reports*. 8(1):4828. doi:10.1038/s41598-018-22678-y.
- Singer H V., Slattery SM, Armstrong L, Witherly S. 2020. Assessing breeding duck population trends relative to anthropogenic disturbances across the Boreal plains of Canada, 1960–2007. *Avian Conserv Ecol*. 15(1):1. doi:10.5751/ACE-01493-150101.
- Stern ER, Riva F, Nielsen SE. 2018. Effects of Narrow Linear Disturbances on Light and Wind Patterns in Fragmented Boreal Forests in Northeastern Alberta. *Forests*. 9(8):486. doi:10.3390/f9080486.
- Stevenson CJ, Filicetti AT, Nielsen SE. 2019. High precision altimeter demonstrates simplification and depression of microtopography on seismic lines in treed peatlands. *Forests*. 10(4):295. doi:10.3390/f10040295.
- Stewart FEC, Nowak JJ, Micheletti T, McIntire EJB, Schmiegelow FKA, Cumming SG. 2020. Boreal Caribou Can Coexist with Natural but Not Industrial Disturbances. *J Wildl Manage*. 84(8):1435–1444. doi:10.1002/jwmg.21937.
- Tattersall ER, Burgar JM, Fisher JT, Burton AC. 2020. Boreal predator co-occurrences reveal shared use of seismic lines in a working landscape. *Ecol Evol*. 10(3):1678–1691. doi:10.1002/ece3.6028.
- Tattersall ER, Burgar JM, Fisher JT, Burton AC. 2020. Mammal seismic line use varies with restoration: Applying habitat restoration to species at risk conservation in a working landscape. *Biol Conserv*. 241:108295. doi:10.1016/j.biocon.2019.108295.
- Toews M, Juanes F, Burton AC. 2017. Mammal responses to human footprint vary with spatial extent but not with spatial grain. *Ecosphere*. 8(3). doi:10.1002/eecs2.1735.
- Toews M, Juanes F, Burton AC. 2018. Mammal responses to the human footprint vary across species and stressors. *Journal of Environmental Management*. 217:690-699. doi:10.1016/j.jenvman.2018.04.009.
- UNESCO (United Nations Educational, Scientific and Cultural Organization). 2017. World Heritage Centre. International Union for Conservation. Mission Report. Reactive Monitoring Mission to Wood Buffalo National Park, Canada [Mission Report].
- Van Wilgenburg S, Hobson K, Bayne E, Koper N. 2013. Estimated Avian Nest Loss Associated with Oil and Gas Exploration and Extraction in the Western Canadian Sedimentary Basin. *Avian Conservation and Ecology*. 8(2). doi:10.5751/ACE-00585-080209.
- Wasser SK, Keim JL, Taper ML, Lele SR. 2011. The influences of wolf predation, habitat loss, and human activity on caribou and moose in the Alberta oil sands. *Frontiers in Ecology and the Environment*. 9(10):546-551. doi:10.1890/100071.
- Wilson S, Saracco JF, Flockhart DTT, Godwin CM, Foster KR. 2018. Drivers of demographic decline across the annual cycle of a threatened migratory bird. *Scientific Reports*. 8(7316). doi:10.1038/s41598-018-25633-z.
- Wilson SJ, Bayne EM. 2018. Use of an acoustic location system to understand how presence of conspecifics and canopy cover influence ovenbird (*Seiurus aurocapilla*) space use near reclaimed wellsites in the boreal forest of alberta. *Avian Conserv Ecol*. 13(2). doi:10.5751/ACE-01248-130204.



Zhang J, Kissling WD, He F. 2013. Local forest structure, climate and human disturbance determine regional distribution of boreal bird species richness in Alberta, Canada. *Journal of Biogeography*. 40(6):1131-1142. doi:10.1111/jbi.12063.

Zhang J, Mayor SJ, He F. 2014. Does disturbance regime change community assembly of angiosperm plant communities in the boreal forest? *J Plant Ecol*. 7(2):188-201. doi:10.1093/jpe/rtt068.

## Wildfire

---

Adams C, McLinden CA, Shephard MW, Dickson N, Dammers E, Chen J, Makar P, Cady-Pereira KE, Tam N, Kharol SK, et al. 2019. Satellite-derived emissions of carbon monoxide, ammonia, and nitrogen dioxide from the 2016 Horse River wildfire in the Fort McMurray area. *Atmos Chem Phys*. 19(4):2577–2599. doi:10.5194/acp-19-2577-2019.

Ahad JME, Jautzy JJ, Cumming BF, Das B, Laird KR, Sanei H. 2015. Sources of polycyclic aromatic hydrocarbons (PAHs) to northwestern Saskatchewan lakes east of the Athabasca oil sands. *Org Geochem*. 80:35–45. doi:10.1016/j.orggeochem.2015.01.001.

Bari MA, Kindzierski WB. 2015. Fifteen-year trends in criteria air pollutants in oil sands communities of Alberta, Canada. *Environ Int* 74:200–208. <https://doi.org/10.1016/j.envint.2014.10.009>

Bari MA, Kindzierski WB. 2016. Evaluation of air quality indicators in Alberta, Canada—An international perspective. *Environ Int* 92: 119-129. <http://dx.doi.org/10.1016/j.envint.2016.03.021>

Bari MA, Kindzierski WB. 2017. Ambient fine particulate matter (PM<sub>2.5</sub>) in Canadian oil sands communities: Levels, sources and potential human health risk. *Sci Total Environ*. 595:828–838. doi:10.1016/j.scitotenv.2017.04.023.

Bytnerowicz A, Hsu YM, Percy K, Legge A, Fenn ME, Schilling S, Frączek W, Alexander D. 2016. Ground-level air pollution changes during a boreal wildland mega-fire. *Sci Total Environ*. 572:755–769. doi:10.1016/j.scitotenv.2016.07.052

Fenn ME, Bytnerowicz A, Schilling SL, Ross CS. 2015. Atmospheric deposition of nitrogen, sulfur and base cations in jack pine stands in the Athabasca Oil Sands Region, Alberta, Canada. *Environ Pollut*. 196:497–510. doi:10.1016/j.envpol.2014.08.023

Fraser A, Dastoor A, Ryjkov A. 2018. How important is biomass burning in Canada to mercury contamination? *Atmos Chem Phys*. 18(10):7263–7286. doi:10.5194/acp-18-7263-2018.

Harner T, Rauert C, Muir D, Schuster JK, Hsu YM, Zhang L, Marson G, Watson JG, Ahad J, Cho S, et al. 2018. Air synthesis review: Polycyclic aromatic compounds in the oil sands region. *Environ Rev*. 26(4):430–468. doi:10.1139/er-2018-0039

Hsu YM, Clair TA. 2015. Measurement of fine particulate matter water-soluble inorganic species and precursor gases in the Alberta oil sands region using an improved semicontinuous monitor. *J Air Waste Manag Assoc*. 65(4):423–435. doi:10.1080/10962247.2014.1001088.

Landis MS, Edgerton ES, White EM, Wentworth GR, Sullivan AP, Dillner AM. 2018. The impact of the 2016 Fort McMurray Horse River Wildfire on ambient air pollution levels in the Athabasca Oil Sands Region, Alberta, Canada. *Sci Total Environ*. 618:1665–1676. doi:10.1016/j.scitotenv.2017.10.008

Landis MS, Pancras JP, Graney JR, White EM, Edgerton ES, Legge A, Percy KE. 2017. Source apportionment of ambient fine and coarse particulate matter at the Fort McKay community site, in the Athabasca Oil Sands Region, Alberta, Canada. *Sci Total Environ*. 584–585:105–117. doi:10.1016/j.scitotenv.2017.01.110

- Landis MS, Studabaker WB, Pancras JP, Graney JR, White EM, Edgerton ES. 2019. Source apportionment of ambient fine and coarse particulate matter polycyclic aromatic hydrocarbons at the Bertha Ganter-Fort McKay community site in the Oil Sands Region of Alberta, Canada. *Sci Total Environ.* 666:540–558. doi:10.1016/j.scitotenv.2019.02.126.
- Landis MS, Studabaker WB, Patrick Pancras J, Graney JR, Puckett K, White EM, Edgerton ES. 2019. Source apportionment of an epiphytic lichen biomonitor to elucidate the sources and spatial distribution of polycyclic aromatic hydrocarbons in the Athabasca Oil Sands Region, Alberta, Canada. *Sci Total Environ.* 654:1241–1257. doi:10.1016/j.scitotenv.2018.11.131.
- Lundin JI, Riffell JA, Wasser SK. 2015. Polycyclic aromatic hydrocarbons in caribou, moose, and wolf scat samples from three areas of the Alberta oil sands. *Environ Pollut.* 206:527–534. doi:10.1016/j.envpol.2015.07.035.
- Parsons MT, McLennan D, Lapalme M, Mooney C, Watt C, Mintz R. 2013. Total gaseous mercury concentration measurements at fort mcmurray, Alberta, Canada. *Atmosphere (Basel).* 4(4):472–493. doi:10.3390/atmos4040472
- Phillips-Smith C, Jeong CH, Healy RM, Dabek-Zlotorzynska E, Celo V, Brook JR, Evans G. 2017. Sources of particulate matter components in the Athabasca oil sands region: investigation through a comparison of trace element measurement methodologies. *Atmos Chem Phys.* 17(15):9435–9449. doi:10.5194/acp-17-9435-2017
- Riva F, Acorn JH, Nielsen SE. 2018a. Distribution of Cranberry Blue Butterflies (*Agriades optilete*) and Their Responses to Forest Disturbance from In Situ Oil Sands and Wildfires. *Diversity.* 10(4). doi:10.3390/d10040112.
- Riva F, Pinzon J, Acorn JH, Nielsen SE. 2020. Composite Effects of Cutlines and Wildfire Result in Fire Refuges for Plants and Butterflies in Boreal Treed Peatlands. *Ecosystems.* 23(3):485–497. doi:10.1007/s10021-019-00417-2.
- Schuster JK, Harner T, Su K, Eng A, Wnorowski A, Charland JP. 2019. Temporal and Spatial Trends of Polycyclic Aromatic Compounds in Air across the Athabasca Oil Sands Region Reflect Inputs from Open Pit Mining and Forest Fires. *Environ Sci Technol Lett.* 6(3):178–183. doi:10.1021/acs.estlett.9b00010.
- Schuster JK, Harner T, Su K, Mihele C, Eng A. 2015. First Results from the Oil Sands Passive Air Monitoring Network for Polycyclic Aromatic Compounds. *Environ Sci Technol.* 49(5):2991–2998. doi:10.1021/es505684e
- Stewart FEC, Nowak JJ, Micheletti T, McIntire EJB, Schmiegelow FKA, Cumming SG. 2020. Boreal Caribou Can Coexist with Natural but Not Industrial Disturbances. *J Wildl Manage.* 84(8):1435–1444. doi:10.1002/jwmg.21937.
- Wasser SK, Keim JL, Taper ML, Lele SR. 2011. The influences of wolf predation, habitat loss, and human activity on caribou and moose in the Alberta oil sands. *Frontiers in Ecology and the Environment.* 9(10):546–551. doi:10.1890/100071.
- Wentworth GR, Aklilu Y-A, Landis MS, Hsu YM. 2018. Impacts of a large boreal wildfire on ground level atmospheric concentrations of PAHs, VOCs and ozone. *Atmos Environ.* 178(December 2017):19–30. doi:10.1016/j.atmosenv.2018.01.013.
- Whaley CH, Makar PA, Shephard MW, Zhang L, Zhang J, Zheng Q, Akingunola A, Wentworth GR, Murphy JG, Kharol SK, et al. 2018. Contributions of natural and anthropogenic sources to ambient ammonia in the Athabasca Oil Sands and north-western Canada. *Atmos Chem Phys.* 18:2011–2034. doi.org/10.5194/acp-18-2011-2018.

## Pathway

---

### Altered disturbance regime

---

- Arienti MC, Cumming SG, Krawchuk MA, Boutin S. 2009. Road network density correlated with increased lightning fire incidence in the Canadian western boreal forest. *Int J Wildl Fire*. 18(8):970. doi:10.1071/wf08011.
- Barber QE, Parisien MA, Whitman E, Stralberg D, Johnson CJ, St-Laurent MH, DeLancey ER, Price DT, Arseneault D, Wang X, et al. 2018. Potential impacts of climate change on the habitat of boreal woodland caribou. *Ecosphere*. 9(10). doi:10.1002/ecs2.2472.
- Latham ADM, Latham MC, Boyce MS, Boutin S. 2013. Spatial relationships of sympatric wolves (*Canis lupus*) and coyotes (*C. latrans*) with woodland caribou (*Rangifer tarandus caribou*) during the calving season in a human-modified boreal landscape. *Wildl Res*. 40(3):250-260. doi:10.1071/WR12184.
- Mahon CL, Holloway G, Sólomos P, Cumming SG, Bayne EM, Schmiegelow FKA, Song SJ. 2016. Community structure and niche characteristics of upland and lowland western boreal birds at multiple spatial scales. *Forest Ecology and Management*. 361:99-116. doi:10.1016/j.foreco.2015.11.007.
- Riva F, Pinzon J, Acorn JH, Nielsen SE. 2020. Composite Effects of Cutlines and Wildfire Result in Fire Refuges for Plants and Butterflies in Boreal Treed Peatlands. *Ecosystems*. 23(3):485–497. doi:10.1007/s10021-019-00417-2.
- Stewart FEC, Nowak JJ, Micheletti T, McIntire EJB, Schmiegelow FKA, Cumming SG. 2020. Boreal Caribou Can Coexist with Natural but Not Industrial Disturbances. *J Wildl Manage*. 84(8):1435–1444. doi:10.1002/jwmg.21937.
- Zhang J, Mayor SJ, He F. 2014. Does disturbance regime change community assembly of angiosperm plant communities in the boreal forest? *J Plant Ecol*. 7(2):188-201. doi:10.1093/jpe/rtt068.

### Ambient air quality

---

- Adamache, Lori, Spink, David. 2012. Cumulative Effects: Concerns of Fort McKay regarding the impacts of emissions to air from industrial development. Prepared for the Fort McKay Sustainability Department. September 2012.
- Adams C, McLinden CA, Shephard MW, Dickson N, Dammers E, Chen J, Makar P, Cady-Pereira KE, Tam N, Kharol SK, et al. 2019. Satellite-derived emissions of carbon monoxide, ammonia, and nitrogen dioxide from the 2016 Horse River wildfire in the Fort McMurray area. *Atmos Chem Phys*. 19(4):2577–2599. doi:10.5194/acp-19-2577-2019.
- Ahad JME, Jautzy JJ, Cumming BF, Das B, Laird KR, Sanei H. 2015. Sources of polycyclic aromatic hydrocarbons (PAHs) to northwestern Saskatchewan lakes east of the Athabasca oil sands. *Org Geochem*. 80:35–45. doi:10.1016/j.orggeochem.2015.01.001.
- Akingunola A, Makar PA, Zhang J, Darlington A, Li SM, Gordon M, Moran MD, Zheng Q. 2018. A chemical transport model study of plume-rise and particle size distribution for the Athabasca oil sands. *Atmos Chem Phys*. 18(12):8667–8688. doi:10.5194/acp-18-8667-2018.

- Alexander AC, Chambers PA, Jeffries DS. 2017. Episodic acidification of 5 rivers in Canada's oil sands during snowmelt: A 25-year record. *Sci Total Environ.* 599–600:739–749. doi:10.1016/j.scitotenv.2017.04.207.
- Baray S, Darlington A, Gordon M, Hayden KL, Leithead A, Li S-M, Liu PSK, Mittermeier RL, Moussa SG, O'Brien J, Staebler R, Wolde M, Worthy D and McLaren R. 2018. Quantification of methane sources in the Athabasca Oil Sands Region of Alberta by aircraft mass balance. *Atmos Chem Phys.* 18(10):7361–7378. doi:10.5194/acp-18-7361-2018.
- Bari MA and Kindzierski WB, 2018. Ambient volatile organic compounds (VOCs) in communities of the Athabasca oil sands region: Sources and screening health risk assessment. *Environ Pollut* 235: 602-614. <https://doi.org/10.1016/j.envpol.2017.12.065>
- Bari MA, Kindzierski WB and Cho S. 2014. A wintertime investigation of atmospheric deposition of metals and polycyclic aromatic hydrocarbons in the Athabasca Oil Sands Region, Canada. *Sci Total Environ* 485-486: 180-192. <http://dx.doi.org/10.1016/j.scitotenv.2014.03.088>
- Bari MA, Kindzierski WB and Spink D. 2016. Twelve-year trends in ambient concentrations of volatile organic compounds in a community of the Alberta Oil Sands Region, Canada. *Environ Int* 91: 40-50. <http://dx.doi.org/10.1016/j.envint.2016.02.015>
- Bari MA, Kindzierski WB. 2015. Fifteen-year trends in criteria air pollutants in oil sands communities of Alberta, Canada. *Environ Int* 74:200–208. <https://doi.org/10.1016/j.envint.2014.10.009>
- Bari MA, Kindzierski WB. 2016. Evaluation of air quality indicators in Alberta, Canada—An international perspective. *Environ Int* 92: 119-129. <http://dx.doi.org/10.1016/j.envint.2016.03.021>
- Bari MA, Kindzierski WB. 2017. Ambient fine particulate matter (PM<sub>2.5</sub>) in Canadian oil sands communities: Levels, sources and potential human health risk. *Sci Total Environ.* 595:828–838. doi:10.1016/j.scitotenv.2017.04.023.
- Bartels SF, Gendreau-Berthiaume B, Macdonald SE. 2019. The impact of atmospheric acid deposition on tree growth and forest understory vegetation in the Athabasca Oil Sands Region. *Sci Total Environ.* 696:133877. doi:10.1016/j.scitotenv.2019.133877.
- Brook JR, Cober SG, Freemark M, Harner T, Li SM, Liggio J, Makar P, Pauli B. 2019. Advances in science and applications of air pollution monitoring: A case study on oil sands monitoring targeting ecosystem protection. *J Air Waste Manag Assoc.* 69(6):661–709. doi:10.1080/10962247.2019.1607689.
- Bytnerowicz A, Hsu YM, Percy K, Legge A, Fenn ME, Schilling S, Frączek W, Alexander D. 2016. Ground-level air pollution changes during a boreal wildland mega-fire. *Sci Total Environ.* 572:755–769. doi:10.1016/j.scitotenv.2016.07.052
- Bytnerowicz, A., Frackzec, W., Schilling, S., Alexander, D. (2010). Spatial and temporal distribution of ambient nitric acid and ammonia in the Athabasca Oil Sands Region, Alberta. J. Aherne and D.P. Shaw (Guest Editors). *Impacts of sulphur and nitrogen deposition in western Canada J. Limnol.*, 69(Suppl. 1), 11-21. doi.org/10.3274/JL10-69-S1-03
- Candler, Craig, Gibson, Ginger, Mikisew Cree First Nation. 2015. Wîyôw'tam'kitaskino (Our Land is Rich): A Mikisew Cree culture & rights assessment for the proposed Teck Frontier project update. Prepared for Mikisew Cree First Nation.
- Cheng I, Wen D, Zhang L, Wu Z, Qiu X, Yang F, Harner T. 2018. Deposition Mapping of Polycyclic Aromatic Compounds in the Oil Sands Region of Alberta, Canada and Linkages to Ecosystem Impacts. *Environ Sci Technol.* 52(21): 12456-12464. doi:10.1021/acs.est.8b02486
- Cheng Y, Li SM, Gordon M, Liu P. 2018. Size distribution and coating thickness of black carbon from the Canadian oil sands operations. *Atmos Chem Phys.* 18(4):2653–2667. doi.org/10.5194/acp-18-2653-2018

Chibwe L, Manzano CA, Muir D, Atkinson B, Kirk JL, Marvin CH, Wang X, Teixeira C, Shang D, Harner T, et al. 2019. Deposition and Source Identification of Nitrogen Heterocyclic Polycyclic Aromatic Compounds in Snow, Sediment, and Air Samples from the Athabasca Oil Sands Region. *Environ Sci Technol*. 53(6):2981–2989. doi:10.1021/acs.est.8b06175.

Cho S, McEachern P, Morris R, Shah T, Johnson J, Nopmongkol U. 2012. Emission sources sensitivity study for ground-level ozone and PM<sub>2.5</sub> due to oil sands development using air quality modeling system: Part I- model evaluation for current year base case simulation. *Atmos Environ* 55:533–541. doi:10.1016/j.atmosenv.2012.02.026

Cho S, Sharma K, Brassard BW, Hazewinkel R. 2014. Polycyclic aromatic hydrocarbon deposition in the snowpack of the Athabasca oil sands region of Alberta, Canada. *Water Air Soil Pollut*. 225(5). doi:10.1007/s11270-014-1910-4.

Cho S, Vijayaraghavan K, Spink D, Cosic B, Davies M, Jung J. 2017. Assessing the effects of oil sands related ozone precursor emissions on ambient ozone levels in the Alberta oil sands region, Canada. *Atmos Environ*. 168: 62–74. <http://dx.doi.org/10.1016/j.atmosenv.2017.08.062>

Cho S, Vijayaraghavan K, Spink D, Jung J, Morris R, Pauls R. 2017. Assessment of regional acidifying pollutants in the Athabasca oil sands area under different emission scenarios. *Atmos Environ*. 156:160–168. doi:10.1016/j.atmosenv.2017.02.038.

Cooke CA, Kirk JL, Muir DCG, Wiklund JA, Wang X, Gleason A, Evans MS. 2017. Spatial and temporal patterns in trace element deposition to lakes in the Athabasca oil sands region (Alberta, Canada). *Environ Res Lett*. 12(12):26. doi:10.1088/1748-9326/aa9505.

Dann, Tom. 2013. Integration of odour data for the Human Exposure Monitoring Program (HEMP). Prepared for the Wood Buffalo Environmental Association.

Davidson C and Spink D. 2018. Alternate approaches for assessing impacts of oil sands development on air quality: A case study using the First Nation Community of Fort McKay. *J Air Waste Manage Assoc* 68: 308-318. DOI: 10.1080/10962247.2017.1377648

Davidson CJ, Foster KR, Tanna RN. 2020. Forest health effects due to atmospheric deposition: Findings from long-term forest health monitoring in the Athabasca Oil Sands Region. *Sci Total Environ*. 699:134277. doi:10.1016/j.scitotenv.2019.134277.

Edgerton ES, Hsu YM, White EM, Fenn ME, Landis MS. 2020. Ambient concentrations and total deposition of inorganic sulfur, inorganic nitrogen and base cations in the Athabasca Oil Sands Region. *Sci Total Environ*. 706:134864. doi:10.1016/j.scitotenv.2019.134864.

Fenn ME, Bytnerowicz A, Schilling SL, Ross CS. 2015. Atmospheric deposition of nitrogen, sulfur and base cations in jack pine stands in the Athabasca Oil Sands Region, Alberta, Canada. *Environ Pollut*. 196:497–510. doi:10.1016/j.envpol.2014.08.023

Fioletov VE, McLinden CA, Cede A, Davies J, Mihele C, Netcheva S, Li SM, O'Brien J. 2016. Sulfur dioxide (SO<sub>2</sub>) vertical column density measurements by Pandora spectrometer over the Canadian oil sands. *Atmos Meas Tech*. 9(7):2961–2976. doi:10.5194/amt-9-2961-2016

Foster KR, Davidson C, Tanna RN, Spink D. 2019. Introduction to the virtual special issue monitoring ecological responses to air quality and atmospheric deposition in the Athabasca Oil Sands region the wood Buffalo environmental Association's Forest health monitoring program. *Sci Total Environ*. 686:345-359. doi:10.1016/j.scitotenv.2019.05.353.

Gopalapillai Y, Kirk JL, Landis MS, Muir DCG, Cooke CA, Gleason A, Ho A, Kelly E, Schindler D, Wang X, Lawson G. 2019. Source Analysis of Pollutant Elements in Winter Air Deposition in the Athabasca Oil Sands Region: A Temporal and Spatial Study. *ACS Earth Space Chem*. 2019, 3, 8, 1656–1668. doi:10.1021/acsearthspacechem.9b00150

Gordon M, Makar PA, Staebler RM, Zhang J, Akingunola A, Gong W, Li SM. 2018. A comparison of plume rise algorithms to stack plume measurements in the Athabasca oil sands. *Atmos Chem Phys*. 18(19):14695–14714. doi:10.5194/acp-18-14695-2018.

- Graney JR, Edgerton ES, Landis MS. 2019. Using Pb isotope ratios of particulate matter and epiphytic lichens from the Athabasca Oil Sands Region in Alberta, Canada to quantify local, regional, and global Pb source contributions. *Sci Total Environ.* 654:1293–1304. doi:10.1016/j.scitotenv.2018.11.047.
- Graney JR, Landis MS, Puckett KJ, Studabaker WB, Edgerton ES, Legge AH, Percy KE. 2017. Differential accumulation of PAHs, elements, and Pb isotopes by five lichen species from the Athabasca Oil Sands Region in Alberta, Canada. *Chemosphere.* 184:700–710. doi:10.1016/j.chemosphere.2017.06.036.
- Griffin D, Zhao X, McLinden CA, Boersma F, Bourassa A, Dammers E, Degenstein D, Eskes H, Fehr L, Fioletov V, et al. 2019. High-Resolution Mapping of Nitrogen Dioxide With TROPOMI: First Results and Validation Over the Canadian Oil Sands. *Geophysical Research Letters.* 46(2):1049–1060. doi:10.1029/2018GL081095.
- Harner T, Rauert C, Muir D, Schuster JK, Hsu YM, Zhang L, Marson G, Watson JG, Ahad J, Cho S, et al. 2018. Air synthesis review: Polycyclic aromatic compounds in the oil sands region. *Environ Rev.* 26(4):430–468. doi:10.1139/er-2018-0039
- Howell SG, Clarke AD, Freitag S, McNaughton CS, Kapustin V, Brekovskikh V, Jimenez JL, Cubison MJ. 2014. An airborne assessment of atmospheric particulate emissions from the processing of Athabasca oil sands. *Atmos Chem Phys.* 14(10):5073–5087. doi:10.5194/acp-14-5073-2014
- Hsu YM, Bytnerowicz A, Fenn ME, Percy KE. 2016. Atmospheric dry deposition of sulfur and nitrogen in the Athabasca Oil Sands Region, Alberta, Canada. *Sci Total Environ.* 568:285–295. doi:10.1016/j.scitotenv.2016.05.205
- Hsu YM, Wang X, Chow JC, Watson JG, Percy KE. 2016. Collocated comparisons of continuous and filter-based PM<sub>2.5</sub> measurements at Fort McMurray, Alberta, Canada. *J Air Waste Manag Assoc.* 66(3):329–339. doi:10.1080/10962247.2015.1136362
- Hsu YM. 2013. Trends in passively-measured ozone, nitrogen dioxide and sulfur dioxide concentrations in the Athabasca Oil Sands Region of Alberta, Canada. *Aerosol Air Qual Res.* 13(5):1448–1463. doi:10.4209/aaqr.2012.08.0224
- Huang R, Mchphedran KN, Yang L, El-Din MG. 2016. Characterization and distribution of metal and nonmetal elements in the Alberta oil sands region of Canada. *Chemosphere.* 147(January):218–229. doi:10.1016/j.chemosphere.2015.12.099
- Irvine GM, Blais JM, Doyle JR, Kimpe LE, White PA. 2014. Cancer risk to First Nations' people from exposure to polycyclic aromatic hydrocarbons near in-situ bitumen extraction in Cold Lake, Alberta. *Environ Heal A Glob Access Sci Source.* 13(1):1–15. doi:10.1186/1476-069X-13-7.
- Jariyasopit N, Harner T, Wu D, Williams A, Halappanavar S, Su K. 2016. Mapping Indicators of Toxicity for Polycyclic Aromatic Compounds in the Atmosphere of the Athabasca Oil Sands Region. *Environ Sci Technol.* 50(20):11282–11291. doi:10.1021/acs.est.6b02058
- Jariyasopit N, Zhang Y, Martin JW, Harner T. 2018. Comparison of polycyclic aromatic compounds in air measured by conventional passive air samplers and passive dry deposition samplers and contributions from petcoke and oil sands ore. *Atmos Chem Phys.* 18(12):9161–9171. doi:10.5194/acp-18-9161-2018.
- Jautzy J, Ahad JME, Gobeil C, Savard MM. 2013. Century-long source apportionment of PAHs in athabasca oil sands region lakes using diagnostic ratios and compound-specific carbon isotope signatures. *Environ Sci Technol.* 47(12):6155–6163. doi:10.1021/es400642e.
- Jung K, Chang SX, Ok YS, Arshad MA. 2013. Critical loads and H<sup>+</sup> budgets of forest soils affected by air pollution from oil sands mining in Alberta, Canada. *Atmos Environ.* 69:56–64. doi:10.1016/j.atmosenv.2012.12.010.
- Kelly EN, Schindler DW, Hodson P V., Short JW, Radmanovich R, Nielsen CC. 2010. Oil sands development contributes elements toxic at low concentrations to the Athabasca River and its tributaries. *Proc Natl Acad Sci U S A.* 107(37):16178–16183. doi:10.1073/pnas.1008754107.
- Kelly EN, Short JW, Schindler DW, Hodson P V., Ma M, Kwan AK, Fortin BL. 2009. Oil sands development contributes polycyclic aromatic compounds to the Athabasca River and its tributaries. *Proc Natl Acad Sci U S A.* 106(52):22346–22351. doi:10.1073/pnas.0912050106.

- Kirk JL, Muir DCG, Gleason A, Wang X, Lawson G, Frank RA, Lehnerr I, Wrona F. 2014. Atmospheric deposition of mercury and methylmercury to landscapes and waterbodies of the Athabasca oil sands region. *Environ Sci Technol*. 48(13):7374–7383. doi:10.1021/es500986r.
- Kurek J, Kirk JL, Muir DCG, Wang X, Evans MS, Smol JP. 2013. Legacy of a half century of Athabasca oil sands development recorded by lake ecosystems. *Proc Natl Acad Sci*. 110(5):1761–1766. doi:10.1073/pnas.1217675110.
- Landis MS, Edgerton ES, White EM, Wentworth GR, Sullivan AP, Dillner AM. 2018. The impact of the 2016 Fort McMurray Horse River Wildfire on ambient air pollution levels in the Athabasca Oil Sands Region, Alberta, Canada. *Sci Total Environ*. 618:1665–1676. doi:10.1016/j.scitotenv.2017.10.008
- Landis MS, Studabaker WB, Patrick Pancras J, Graney JR, Puckett K, White EM, Edgerton ES. 2019. Source apportionment of an epiphytic lichen biomonitor to elucidate the sources and spatial distribution of polycyclic aromatic hydrocarbons in the Athabasca Oil Sands Region, Alberta, Canada. *Sci Total Environ*. 654:1241–1257. doi:10.1016/j.scitotenv.2018.11.131.
- Lee AKY, Adam MG, Liggio J, Li SM, Li K, Willis MD, Abbatt JPD, Tokarek TW, Odame-Ankrah CA, Osthoff HD, et al. 2019. A large contribution of anthropogenic organo-nitrates to secondary organic aerosol in the Alberta oil sands. *Atmos Chem Phys*. 19(19):12209–12219. doi:10.5194/acp-19-12209-2019.
- Li K, Liggio J, Han C, Liu Q, Moussa SG, Lee P, Li SM. 2019b. Understanding the Impact of High-NO<sub>x</sub> Conditions on the Formation of Secondary Organic Aerosol in the Photooxidation of Oil Sand-Related Precursors. *Environ Sci Technol*. 53(24):14420–14429. doi:10.1021/acs.est.9b05404
- Li S-M, Leithead A, Moussa SG, Liggio J, Moran MD, Wang D, Hayden K, Darlington A, Gordon M, Staebler R, et al. 2017. Differences between measured and reported volatile organic compound emissions from oil sands facilities in Alberta, Canada. *Proc Natl Acad Sci*. 114(19):E3756–E3765. doi:10.1073/pnas.1617862114
- Liggio J, Li SM, Hayden K, Taha YM, Stroud C, Darlington A, Drollette BD, Gordon M, Lee P, Liu P, et al. 2016. Oil sands operations as a large source of secondary organic aerosols. *Nature*. 534(7605):91–94. doi:10.1038/nature17646
- Liggio J, Moussa SG, Wentzell J, Darlington A, Liu P, Leithead A, Hayden K, O'Brien J, Mittermeier RL, Staebler R, et al. 2017. Understanding the primary emissions and secondary formation of gaseous organic acids in the oil sands region of Alberta, Canada. *Atmos Chem Phys*. 17: 8411–8427. doi.org/10.5194/acp-17-8411-2017
- Liggio J, Stroud CA, Wentzell J, Zhang J, Sommers J, Darlington A, Liu PSKK, Moussa SG, Leithead A, Hayden K, et al. 2017. Quantifying the Primary Emissions and Photochemical Formation of Isocyanic acid (HNCO) Downwind of Oil Sands Operations. *Environ Sci Technol*. 51(24):14462–14471. doi:10.1021/acs.est.7b04346
- Makar PA, Cheung P, Zhang J, Aklilu Y, Jeffries DS, Li S-M, Akingunola A, Hayden K, Baratzedah P, Scott K, et al. 2018. Estimates of exceedances of critical loads for acidifying deposition in Alberta and Saskatchewan. *Atmos Chem Phys*.:9897–9927. doi:10.5194/acp-18-9897-2018.
- Manzano CA, Marvin C, Muir D, Harner T, Martin J, Zhang Y. 2017. Heterocyclic Aromatics in Petroleum Coke, Snow, Lake Sediments, and Air Samples from the Athabasca Oil Sands Region. *Environ Sci Technol*. 51(10):5445–5453. doi:10.1021/acs.est.7b01345.
- Manzano CA, Muir D, Kirk J, Teixeira C, Siu M, Wang X, Charland JP, Schindler D, Kelly E. 2016. Temporal variation in the deposition of polycyclic aromatic compounds in snow in the Athabasca Oil Sands area of Alberta. *Environ Monit Assess*. 188(9). doi:10.1007/s10661-016-5500-3.
- McLinden CA, Fioletov V, Boersma KF, Kharol SK, Krotkov N, Lamsal L, Makar PA, Martin R V, Veefkind JP, Yang K. 2014. Improved satellite retrievals of NO<sub>2</sub> and SO<sub>2</sub> over the Canadian oil sands and comparisons with surface measurements. *Atmos Chem Phys*. 14(7):3637–3656. doi:10.5194/acp-14-3637-2014
- McLinden CA, Fioletov V, Boersma KF, Krotkov N, Sioris CE, Veefkind JP, Yang K. 2012. Air quality over the Canadian oil sands: A first assessment using satellite observations. *Geophys Res Lett*. 39(4):1–8. doi:10.1029/2011GL050273

- McLinden CA, Fioletov V, Krotkov NA, Li C, Boersma KF, Adams C. 2016. A Decade of Change in NO<sub>2</sub> and SO<sub>2</sub> over the Canadian Oil Sands As Seen from Space. *Environ Sci Technol*. 50(1):331–337. doi:10.1021/acs.est.5b04985
- McNaughton CS, Vandenberg J, Thiede P. 2019. Reanalysis of aerial deposition of metals and polycyclic aromatic compounds to snow in the Athabasca Oil Sands Region of Alberta Canada. *Sci Total Environ*. 682:692–708. doi:10.1016/j.scitotenv.2019.05.097.
- Parajulee A, Wania F. 2014. Evaluating officially reported polycyclic aromatic hydrocarbon emissions in the Athabasca oil sands region with a multimedia fate model. *Proc Natl Acad Sci U S A*. 111(9):3344–3349. doi:10.1073/pnas.1319780111.
- Parsons MT, McLennan D, Lapalme M, Mooney C, Watt C, Mintz R. 2013. Total gaseous mercury concentration measurements at fort mcmurray, Alberta, Canada. *Atmosphere (Basel)*. 4(4):472–493. doi:10.3390/atmos4040472
- Percy KE, Hansen MC, Dann T. 2012. Air Quality in the Athabasca Oil Sands Region 2011. *Developments in Environmental Science* 11: 47-91. doi.org/10.1016/B978-0-08-097760-7.00004-4
- Percy KE. 2013. Ambient air quality and linkage to ecosystems in the Athabasca oil sands, Alberta. *Geosci Can* 40(11): 182–201. doi.org/10.12789/geocanj.2013.40.014
- Percy, Jane. 2019. Harvesting Knowledge: Monitoring berries in the Athabasca Oil Sands region. <https://www12.statcan.gc.ca/census-recensement/2016/as-sa/98-200-x/2016022/98-200-x2016022-eng.cfm> [Accessed 2019 April 18]. Available from: <https://osmreport.ca/report/harvesting-knowledge/>
- Proemse BC, Mayer B, Fenn ME, Ross CS. 2013. A multi-isotope approach for estimating industrial contributions to atmospheric nitrogen deposition in the Athabasca oil sands region in Alberta, Canada. *Environ Pollut*. 182:80–91. doi:10.1016/j.envpol.2013.07.004
- Proemse BC, Mayer B, Fenn ME. 2012. Tracing industrial sulfur contributions to atmospheric sulfate deposition in the Athabasca oil sands region, Alberta, Canada. *Appl Geochemistry*. 27(12):2425–2434. doi:10.1016/j.apgeochem.2012.08.006
- Qiu X, Cheng I, Yang F, Horb E, Zhang L, Harner T. 2018. Emissions databases for polycyclic aromatic compounds in the Canadian Athabasca oil sands region-development using current knowledge and evaluation with passive sampling and air dispersion modelling data. *Atmos Chem Phys*. 18(5):3457–3467.
- Rauert C, Harner T, Ahad JME, Percy KE. 2020. Using tree cores to evaluate historic atmospheric concentrations and trends of polycyclic aromatic compounds in the Oil Sands region of Alberta, Canada. *Sci Total Environ*. 739: 139996. doi: 10.1016/j.scitotenv.2020.139996
- Russell M, Hakami A, Makar P, Akingunola A, Zhang J, Moran M, Zheng Q. 2019. An evaluation of the efficacy of very high resolution air-quality modelling over the Athabasca oil sands region, Alberta, Canada. *Atmos Chem Phys*. 19: 4393-4417. doi:10.5194/acp-19-4393-2019
- Schuster JK, Harner T, Su K, Eng A, Wnorowski A, Charland JP. 2019. Temporal and Spatial Trends of Polycyclic Aromatic Compounds in Air across the Athabasca Oil Sands Region Reflect Inputs from Open Pit Mining and Forest Fires. *Environ Sci Technol Lett*. 6(3):178–183. doi:10.1021/acs.estlett.9b00010.
- Schuster JK, Harner T, Su K, Mihele C, Eng A. 2015. First Results from the Oil Sands Passive Air Monitoring Network for Polycyclic Aromatic Compounds. *Environ Sci Technol*. 49(5):2991–2998. doi:10.1021/es505684e
- Shephard MW, McLinden CA, Cady-Pereira KE, Luo M, Moussa SG, Leithead A, Liggio J, Staebler RM, Akingunola A, Makar P, et al. 2015. Tropospheric Emission Spectrometer (TES) satellite observations of ammonia, methanol, formic acid, and carbon monoxide over the Canadian oil sands: Validation and model evaluation. *Atmos Meas Tech*. doi:10.5194/amt-8-5189-2015



- Sioris CE, McLinden CA, Shephard MW, Fioletov VE, Abboud I. 2017. Assessment of the aerosol optical depths measured by satellite-based passive remote sensors in the Alberta oil sands region. *Atmos Chem Phys.* 17(3):1931–1943. doi:10.5194/acp-17-1931-2017
- Stachiw S, Bicalho B, Grant-Weaver I, Noernberg T, Shotyk W. 2019. Trace elements in berries collected near upgraders and open pit mines in the Athabasca Bituminous Sands Region (ABSR): Distinguishing atmospheric dust deposition from plant uptake. *Sci Total Environ.* 670:849–864. doi:10.1016/j.scitotenv.2019.03.238.
- Stroud CA, Makar PA, Zhang J, Moran MD, Akingunola A, Li SM, Leithead A, Hayden K, Siu M. 2018. Improving air quality model predictions of organic species using measurement-derived organic gaseous and particle emissions in a petrochemical-dominated region. *Atmos Chem Phys.* 18(18):13531–13545. doi:10.5194/acp-18-13531-2018.
- Studabaker WB, Krupa S, Jayanty RKM, Raymer JH. 2012. Measurement of Polynuclear Aromatic Hydrocarbons (PAHs) in Epiphytic Lichens for Receptor Modeling in the Athabasca Oil Sands Region (AOSR): A Pilot Study.
- Summers JC, Kurek J, Kirk JL, Muir DCG, Wang X, Wiklund JA, Cooke CA, Evans MS, Smol JP. 2016. Recent warming, rather than industrial emissions of bioavailable nutrients, is the dominant driver of lake primary production shifts across the Athabasca Oil Sands Region. *PLoS One.* 11(5). doi:10.1371/journal.pone.0153987.
- Tokarek TW, Odame-Ankrah CA, Huo JA, McLaren R, Lee AKY, Adam MG, Willis MD, Abbatt JPD, Mihele C, Darlington A, et al. 2018. Principal component analysis of summertime ground site measurements in the Athabasca oil sands with a focus on analytically unresolved intermediate-volatility organic compounds. *Atmos Chem Phys.* 18(24):17819–17841. doi:10.5194/acp-18-17819-2018.
- Vijayaraghavan K, Cho S, Morris R, Spink D, Jung J, Pauls R, Duffett K. 2016. Photochemical model evaluation of the ground-level ozone impacts on ambient air quality and vegetation health in the Alberta oil sands region: Using present and future emission scenarios. *Atmos Environ.* 141:209–218. doi:10.1016/j.atmosenv.2016.06.053
- Watmough SA, Whitfield CJ, Fenn ME. 2014. The importance of atmospheric base cation deposition for preventing soil acidification in the Athabasca Oil Sands Region of Canada. *Sci Total Environ.* 493:1–11. doi:10.1016/j.scitotenv.2014.05.110
- WBEA, 2014. Fort McKay Berry Focus Group Video. Available: <https://www.youtube.com/watch?v=F5pl6uPHJPc&t=657s>
- Wentworth GR, Aklilu Y-A, Landis MS, Hsu YM. 2018. Impacts of a large boreal wildfire on ground level atmospheric concentrations of PAHs, VOCs and ozone. *Atmos Environ.* 178(December 2017):19–30. doi:10.1016/j.atmosenv.2018.01.013.
- Whaley CH, Makar PA, Shephard MW, Zhang L, Zhang J, Zheng Q, Akingunola A, Wentworth GR, Murphy JG, Kharol SK, et al. 2018. Contributions of natural and anthropogenic sources to ambient ammonia in the Athabasca Oil Sands and north-western Canada. *Atmos Chem Phys.* 18:2011–2034. doi.org/10.5194/acp-18-2011-2018.
- Whitfield CJ, Aherne J, Watmough SA. 2009. Modeling soil acidification in the athabasca oil sands region, Alberta, Canada. *Environ Sci Technol.* 43(15):5844–5850. doi:10.1021/es9005652.
- Wieder RK, Vile MA, Albright CM, Scott KD, Vitt DH, Quinn JC, Burke-Scoll M. 2016. Effects of altered atmospheric nutrient deposition from Alberta oil sands development on Sphagnum fuscum growth and C, N and S accumulation in peat. *Biogeochemistry.* 129(1–2):1–19. doi:10.1007/s10533-016-0216-6.
- Wieder RK, Vile MA, Scott KD, Albright CM, McMillen KJ, Vitt DH, Fenn ME. 2016. Differential Effects of High Atmospheric N and S Deposition on Bog Plant/Lichen Tissue and Porewater Chemistry across the Athabasca Oil Sands Region. *Environ Sci Technol.* 50(23):12630–12640. doi:10.1021/acs.est.6b03109.

Wood Buffalo Environmental Association (WEBA) 2014. Community odour monitoring project. Annual Report 2013-2014. No: 1410\_20898\_01\_03. [internet]. [Accessed 2019 May 22]. Available from: <https://wbea.org/resources/reports-publications/>

Wood Buffalo Environmental Association (WEBA) 2015. Community odour monitoring project. Annual Report 2014-2015. No: 1410\_20898\_02\_01. [internet]. [Accessed 2019 May 21]. Available from: <https://wbea.org/resources/reports-publications/>

Wren SN, Mihele CM, Lu G, Jiang Z, Wen D, Hayden K, Mittermeier RL, Staebler RM, Cober SG, Brook JR. 2020. Improving Insights on Air Pollutant Mixtures and Their Origins by Enhancing Local Monitoring in an Area of Intensive Resource Development. *Environ Sci Technol.* 54(23):14936-14945. doi: <https://doi.org/10.1021/acs.est.0c06055>

Zhang J, Moran MD, Zheng Q, Makar PA, Baratzadeh P, Marson G, Liu P, Li S-M. 2018. Emissions preparation and analysis for multiscale air quality modelling over the Athabasca Oil Sands Region of Alberta, Canada. *Atmos. Chem. Phys.* 18: 10459-10481. <https://doi.org/10.5194/acp-18-10459-2018>

Zhang L, Cheng I, Muir D, Charland JP. 2015. Scavenging ratios of polycyclic aromatic compounds in rain and snow in the Athabasca oil sands region. *Atmos Chem Phys.* 15(3):1421–1434. doi:10.5194/acp-15-1421-2015

Zhang L, Cheng I, Wu Z, Harner T, Schuster J, Charland J-P, Muir D, Parnis JM. 2015. Dry deposition of polycyclic aromatic compounds to various land covers in the Athabasca oil sands region. *J Adv Model Earth Syst.* 10:1–25. doi:10.1002/2017MS001065

Zhang Y, Shotyk W, Zaccone C, Noernberg T, Pelletier R, Bicalho B, Froese DG, Davies L, Martin JW. 2016. Airborne Petcoke Dust is a Major Source of Polycyclic Aromatic Hydrocarbons in the Athabasca Oil Sands Region. *Environ Sci Technol.* 50(4):1711–1720. doi:10.1021/acs.est.5b05092.

## Atmospheric deposition

---

Ahad JME, Jautzy JJ, Cumming BF, Das B, Laird KR, Sanei H. 2015. Sources of polycyclic aromatic hydrocarbons (PAHs) to northwestern Saskatchewan lakes east of the Athabasca oil sands. *Org Geochem.* 80:35–45. doi:10.1016/j.orggeochem.2015.01.001.

Alexander AC, Chambers PA, Jeffries DS. 2017. Episodic acidification of 5 rivers in Canada's oil sands during snowmelt: A 25-year record. *Sci Total Environ.* 599–600:739–749. doi:10.1016/j.scitotenv.2017.04.207.

Anas MU, Scott KA, Cooper RN, Wissel B. 2014. Zooplankton communities are good indicators of potential impacts of athabasca oil sands operations on downwind boreal lakes. *Can J Fish Aquat Sci.* 71(5):719–732. doi:10.1139/cjfas-2013-0472.

Anas MUM, Meegahage BJ, Evans MS, Jeffries DS, Wissel B. 2017. Scale-dependent effects of natural environmental gradients, industrial emissions and dispersal processes on zooplankton metacommunity structure: Implications for the bioassessment of boreal lakes. *Ecol Indic.* 82:484–494. doi:10.1016/j.ecolind.2017.07.035.

Bari MA, Kindzierski WB and Cho S. 2014. A wintertime investigation of atmospheric deposition of metals and polycyclic aromatic hydrocarbons in the Athabasca Oil Sands Region, Canada. *Sci Total Environ* 485-486: 180-192. <http://dx.doi.org/10.1016/j.scitotenv.2014.03.088>

Bartels SF, Gendreau-Berthiaume B, Macdonald SE. 2019. The impact of atmospheric acid deposition on tree growth and forest understory vegetation in the Athabasca Oil Sands Region. *Sci Total Environ.* 696:133877. doi:10.1016/j.scitotenv.2019.133877.

Boutin C, Carpenter DJ. 2017. Assessment of wetland/upland vegetation communities and evaluation of soil-plant contamination by polycyclic aromatic hydrocarbons and trace metals in regions near oil sands mining in Alberta. *Sci Total Environ.* 576:829-839. doi:10.1016/j.scitotenv.2016.10.062.

- Brook JR, Cober SG, Freemark M, Harner T, Li SM, Liggio J, Makar P, Pauli B. 2019. Advances in science and applications of air pollution monitoring: A case study on oil sands monitoring targeting ecosystem protection. *J Air Waste Manag Assoc.* 69(6):661–709. doi:10.1080/10962247.2019.1607689.
- Bytnerowicz, A., Frackzec, W., Schilling, S., Alexander, D. (2010). Spatial and temporal distribution of ambient nitric acid and ammonia in the Athabasca Oil Sands Region, Alberta. J. Aherne and D.P. Shaw (Guest Editors). Impacts of sulphur and nitrogen deposition in western Canada *J. Limnol.*, 69(Suppl. 1), 11-21. doi.org/10.3274/JL10-69-S1-03
- Candler, Craig, Gibson, Ginger, Mikisew Cree First Nation. 2015. Wîyôw'tam'kitaskino (Our Land is Rich): A Mikisew Cree culture & rights assessment for the proposed Teck Frontier project update. Prepared for Mikisew Cree First Nation.
- Cheng I, Wen D, Zhang L, Wu Z, Qiu X, Yang F, Harner T. 2018. Deposition Mapping of Polycyclic Aromatic Compounds in the Oil Sands Region of Alberta, Canada and Linkages to Ecosystem Impacts. *Environ Sci Technol.* 52(21): 12456-12464. doi:10.1021/acs.est.8b02486
- Chibwe L, Manzano CA, Muir D, Atkinson B, Kirk JL, Marvin CH, Wang X, Teixeira C, Shang D, Harner T, et al. 2019. Deposition and Source Identification of Nitrogen Heterocyclic Polycyclic Aromatic Compounds in Snow, Sediment, and Air Samples from the Athabasca Oil Sands Region. *Environ Sci Technol.* 53(6):2981–2989. doi:10.1021/acs.est.8b06175.
- Chibwe, L., Roberts, S., Shang, D., Yang, F., Manzano, C.A., Wang, X., Kirk, J.L. and Muir, D.C., 2020. A one-century sedimentary record of N-and S-polycyclic aromatic compounds in the Athabasca oil sands region in Canada. *Chemosphere*, 260, p.127641.
- Cho S, Sharma K, Brassard BW, Hazewinkel R. 2014. Polycyclic aromatic hydrocarbon deposition in the snowpack of the Athabasca oil sands region of Alberta, Canada. *Water Air Soil Pollut.* 225(5). doi:10.1007/s11270-014-1910-4.
- Cho S, Vijayaraghavan K, Spink D, Jung J, Morris R, Pauls R. 2017. Assessment of regional acidifying pollutants in the Athabasca oil sands area under different emission scenarios. *Atmos Environ.* 156:160–168. doi:10.1016/j.atmosenv.2017.02.038.
- Cooke CA, Kirk JL, Muir DCG, Wiklund JA, Wang X, Gleason A, Evans MS. 2017. Spatial and temporal patterns in trace element deposition to lakes in the Athabasca oil sands region (Alberta, Canada). *Environ Res Lett.* 12(12):26. doi:10.1088/1748-9326/aa9505.
- Culp, J.M., Brua, R.B., Luiker, E. and Glozier, N.E., 2020. Ecological causal assessment of benthic condition in the oil sands region, Athabasca River, Canada. *Science of The Total Environment*, 749, p.141393.
- Curtis CJ, Roger F, Neil R, Shilland J, Simpson GL, Turner S, Yang H, Pla S. 2010. Palaeolimnological assessment of lake acidification and environmental change in the Athabasca Oil Sands Region, Alberta. *J Limnol.* 69(SUPPL. 1):92–104. doi:10.3274/JL10-69-S1-10.
- Davidson CJ, Foster KR, Tanna RN. 2020. Forest health effects due to atmospheric deposition: Findings from long-term forest health monitoring in the Athabasca Oil Sands Region. *Sci Total Environ.* 699:134277. doi:10.1016/j.scitotenv.2019.134277.
- Davies M, Cho S, Spink D, Pauls R, Desilets M, Shen Y, Bajwa K, Person R. 2016. An enhanced approach for the use of satellite-derived leaf area index values in dry deposition modeling in the Athabasca oil sands region. *Journal of Environmental Management.* 184:240–248. doi:10.1016/j.jenvman.2016.09.045.
- Donner MW, Bicalho B, Noernberg T, Shoty W. 2019. Contemporary and Historical Atmospheric Deposition of Arsenic and Selenium in the Athabasca Bituminous Sands Region. *Environ Sci Technol.* 53(23):14020–14028. doi:10.1021/acs.est.9b02718.
- Edgerton ES, Hsu YM, White EM, Fenn ME, Landis MS. 2020. Ambient concentrations and total deposition of inorganic sulfur, inorganic nitrogen and base cations in the Athabasca Oil Sands Region. *Sci Total Environ.* 706:134864. doi:10.1016/j.scitotenv.2019.134864.

- Elmes MC, Wiklund JA, Van Opstal SR, Wolfe BB, Hall RI. 2016. Characterizing baseline concentrations, proportions, and processes controlling deposition of river-transported bitumen-associated polycyclic aromatic compounds at a floodplain lake (Slave River Delta, Northwest Territories, Canada). *Environ Monit Assess.* 188(5):1–15. doi:10.1007/s10661-016-5277-4.
- Emmerton CA, Cooke CA, Wentworth GR, Graydon JA, Ryjkov A, Dastoor A. 2018. Total Mercury and Methylmercury in Lake Water of Canada's Oil Sands Region. *Environ Sci Technol.* 52(19):10946–10955. doi:10.1021/acs.est.8b01680.
- Eng A, Harner T, Pozo K. 2013. A Prototype Passive Air Sampler for Measuring Dry Deposition of Polycyclic Aromatic Hydrocarbons. *Environ Sci Technol Lett.* 1(1):77–81. doi:10.1021/ez400044z.
- Evans M, Davies M, Janzen K, Muir D, Hazewinkel R, Kirk J, De Boer D. 2016. PAH distributions in sediments in the oil sands monitoring area and western Lake Athabasca: Concentration, composition and diagnostic ratios. *Environ Pollut.* 213:671–687. doi:10.1016/j.envpol.2016.03.014.
- Evans MS, Talbot A. 2012. Investigations of mercury concentrations in walleye and other fish in the Athabasca River ecosystem with increasing oil sands developments. *J Environ Monit.* 14(7):1989–2003. doi:10.1039/c2em30132f.
- Fenn ME, Bytnerowicz A, Schilling SL, Ross CS. 2015. Atmospheric deposition of nitrogen, sulfur and base cations in jack pine stands in the Athabasca Oil Sands Region, Alberta, Canada. *Environ Pollut.* 196:497–510. doi:10.1016/j.envpol.2014.08.023
- Foster KR, Davidson C, Tanna RN, Spink D. 2019. Introduction to the virtual special issue monitoring ecological responses to air quality and atmospheric deposition in the Athabasca Oil Sands region the wood Buffalo environmental Association's Forest health monitoring program. *Sci Total Environ.* 686:345-359. doi:10.1016/j.scitotenv.2019.05.353.
- Gopalapillai Y, Kirk JL, Landis MS, Muir DCG, Cooke CA, Gleason A, Ho A, Kelly E, Schindler D, Wang X, et al. 2019. Source Analysis of Pollutant Elements in Winter Air Deposition in the Athabasca Oil Sands Region: A Temporal and Spatial Study. *ACS Earth Sp Chem.* 3(8):1656–1668. doi:10.1021/acsearthspacechem.9b00150.
- Gopalapillai Y, Kirk JL, Landis MS, Muir DCG, Cooke CA, Gleason A, Ho A, Kelly E, Schindler D, Wang X, Lawson G. 2019. Source Analysis of Pollutant Elements in Winter Air Deposition in the Athabasca Oil Sands Region: A Temporal and Spatial Study. *ACS Earth Space Chem.* 2019, 3, 8, 1656–1668. doi:10.1021/acsearthspacechem.9b00150
- Graney JR, Edgerton ES, Landis MS. 2019. Using Pb isotope ratios of particulate matter and epiphytic lichens from the Athabasca Oil Sands Region in Alberta, Canada to quantify local, regional, and global Pb source contributions. *Sci Total Environ.* 654:1293–1304. doi:10.1016/j.scitotenv.2018.11.047.
- Graney JR, Landis MS, Puckett KJ, Studabaker WB, Edgerton ES, Legge AH, Percy KE. 2017. Differential accumulation of PAHs, elements, and Pb isotopes by five lichen species from the Athabasca Oil Sands Region in Alberta, Canada. *Chemosphere.* 184:700–710. doi:10.1016/j.chemosphere.2017.06.036.
- Harner T, Rauert C, Muir D, Schuster JK, Hsu YM, Zhang L, Marson G, Watson JG, Ahad J, Cho S, et al. 2018. Air synthesis review: Polycyclic aromatic compounds in the oil sands region. *Environ Rev.* 26(4):430–468. doi:10.1139/er-2018-0039
- Hazewinkel RRO, Wolfe AP, Pla S, Curtis C, Hadley K. 2008. Have atmospheric emissions from the Athabasca Oil Sands impacted lakes in northeastern Alberta, Canada? *Can J Fish Aquat Sci.* 65(8):1554-1567. doi:10.1139/f08-074.
- Hsu YM, Bytnerowicz A, Fenn ME, Percy KE. 2016. Atmospheric dry deposition of sulfur and nitrogen in the Athabasca Oil Sands Region, Alberta, Canada. *Sci Total Environ.* 568:285–295. doi:10.1016/j.scitotenv.2016.05.205
- Huang R, Mcphedran KN, Yang L, El-Din MG. 2016. Characterization and distribution of metal and nonmetal elements in the Alberta oil sands region of Canada. *Chemosphere.* 147(January):218–229. doi:10.1016/j.chemosphere.2015.12.099

- Jariyasopit N, Zhang Y, Martin JW, Harner T. 2018. Comparison of polycyclic aromatic compounds in air measured by conventional passive air samplers and passive dry deposition samplers and contributions from petcoke and oil sands ore. *Atmos Chem Phys*. 18(12):9161–9171. doi:10.5194/acp-18-9161-2018.
- Jautzy J, Ahad JME, Gobeil C, Savard MM. 2013. Century-long source apportionment of PAHs in athabasca oil sands region lakes using diagnostic ratios and compound-specific carbon isotope signatures. *Environ Sci Technol*. 47(12):6155–6163. doi:10.1021/es400642e.
- Jautzy JJ, Ahad JME, Gobeil C, Smirnoff A, Barst BD, Savard MM. 2015. Isotopic Evidence for Oil Sands Petroleum Coke in the Peace-Athabasca Delta. *Environ Sci Technol*. 49(20):12062–12070. doi:10.1021/acs.est.5b03232.
- Jautzy JJ, Ahad JME, Hall RI, Wiklund JA, Wolfe BB, Gobeil C, Savard MM. 2015. Source Apportionment of Background PAHs in the Peace-Athabasca Delta (Alberta, Canada) Using Molecular Level Radiocarbon Analysis. *Environ Sci Technol*. 49(15):9056–9063. doi:10.1021/acs.est.5b01490.
- Javed MB, Cuss CW, Grant-Weaver I, Shotyk W. 2017. Size-resolved Pb distribution in the Athabasca River shows snowmelt in the bituminous sands region an insignificant source of dissolved Pb. *Sci Rep*. 7(1):1–11. doi:10.1038/srep43622.
- Jung K, Chang SX, Ok YS, Arshad MA. 2013. Critical loads and H<sup>+</sup> budgets of forest soils affected by air pollution from oil sands mining in Alberta, Canada. *Atmos Environ*. 69:56–64. doi:10.1016/j.atmosenv.2012.12.010.
- Kelly EN, Schindler DW, Hodson P V., Short JW, Radmanovich R, Nielsen CC. 2010. Oil sands development contributes elements toxic at low concentrations to the Athabasca River and its tributaries. *Proc Natl Acad Sci U S A*. 107(37):16178–16183. doi:10.1073/pnas.1008754107.
- Kelly EN, Short JW, Schindler DW, Hodson P V., Ma M, Kwan AK, Fortin BL. 2009. Oil sands development contributes polycyclic aromatic compounds to the Athabasca River and its tributaries. *Proc Natl Acad Sci U S A*. 106(52):22346–22351. doi:10.1073/pnas.0912050106.
- Kirk JL, Muir DCG, Gleason A, Wang X, Lawson G, Frank RA, Lehnerr I, Wrona F. 2014. Atmospheric deposition of mercury and methylmercury to landscapes and waterbodies of the athabasca oil sands region. *Environ Sci Technol*. 48(13):7374–7383. doi:10.1021/es500986r.
- Klemt WH, Kay ML, Wiklund JA, Wolfe BB, Hall RI. 2020. Assessment of vanadium and nickel enrichment in Lower Athabasca River floodplain lake sediment within the Athabasca Oil Sands Region (Canada). *Environ Pollut*. 265:114920. doi:10.1016/j.envpol.2020.114920.
- Korosi JB, Cooke CA, Eickmeyer DC, Kimpe LE, Blais JM. 2016. In-situ bitumen extraction associated with increased petrogenic polycyclic aromatic compounds in lake sediments from the Cold Lake heavy oil fields (Alberta, Canada). *Environ Pollut*. 218:915–922. doi:10.1016/j.envpol.2016.08.032.
- Korosi JB, Irvine G, Skierszkan EK, Doyle JR, Kimpe LE, Janvier J, Blais JM. 2013. Localized enrichment of polycyclic aromatic hydrocarbons in soil, spruce needles, and lake sediments linked to in-situ bitumen extraction near Cold Lake, Alberta. *Environ Pollut*. 182:307–315. doi:10.1016/j.envpol.2013.07.012.
- Kurek J, Kirk JL, Muir DCG, Wang X, Evans MS, Smol JP. 2013. Legacy of a half century of Athabasca oil sands development recorded by lake ecosystems. *Proc Natl Acad Sci*. 110(5):1761–1766. doi:10.1073/pnas.1217675110.
- Laird KR, Das B, Hesjedal B, Leavitt PR, Mushet GR, Scott KA, Simpson GL, Wissel B, Wolfe J, Cumming BF. 2017. Paleolimnological assessment of nutrient enrichment on diatom assemblages in a priori defined nitrogen- and phosphorus-limited lakes downwind of the Athabasca Oil Sands, Canada. *J Limnol*. 76(3):488–502. doi:10.4081/jlimnol.2017.1598.
- Laird KR, Das B, Kingsbury M, Moos MT, Pla-Rabes S, Ahad JME, Wiltse B, Cumming BF. 2013. Paleolimnological assessment of limnological change in 10 lakes from northwest Saskatchewan downwind of the Athabasca oils sands based on analysis of siliceous algae and trace metals in sediment cores. *Hydrobiologia*. 720(1):55–73. doi:10.1007/s10750-013-1623-5.

- Laird KR, Mushet GR, Flower RJ, Wolfe AP, Cumming BF. 2020. Heterogeneous response of diatom assemblages since ca. 1945 in lakes from boreal regions of northern Alberta and Saskatchewan, Canada. *J Paleolimnol.* 64(2):137–153. doi:10.1007/s10933-020-00128-y.
- Landis MS, Studabaker WB, Patrick Pancras J, Graney JR, Puckett K, White EM, Edgerton ES. 2019. Source apportionment of an epiphytic lichen biomonitor to elucidate the sources and spatial distribution of polycyclic aromatic hydrocarbons in the Athabasca Oil Sands Region, Alberta, Canada. *Sci Total Environ.* 654:1241–1257. doi:10.1016/j.scitotenv.2018.11.131.
- Lavoie I, Guéguen C, Fortin C. 2011. Benthic diatom communities from rivers in close proximity to the Athabasca tar sands (Alberta, Canada). *Water Qual Res J Canada.* 46(4):355–365. doi:10.2166/wqrjc.2011.019.
- Libera N, Summers JC, Rühland KM, Kurek J, Smol JP. 2020. Diatom assemblage changes in shallow lakes of the Athabasca Oil Sands Region are not tracking aerially deposited contaminants. *J Paleolimnol.* 64(3):257–272. doi:10.1007/s10933-020-00136-y.
- Lynam MM, Dvonch JT, Barres JA, Morishita M, Legge A, Percy K. 2015. Oil sands development and its impact on atmospheric wet deposition of air pollutants to the Athabasca Oil Sands Region, Alberta, Canada. *Environ Pollut.* 206:469–478. doi:10.1016/j.envpol.2015.07.032
- Lynam, M, Dvonch, JT, Barres, J, Percy, K. 2017. Atmospheric wet deposition of mercury to the Athabasca Oil Sands Region, Alberta, Canada. *Air Qual Atmos Hlth.* 1–11. doi.org/10.1007/s11869-017-0524-6
- Makar PA, Cheung P, Zhang J, Aklilu Y, Jeffries DS, Li S-M, Akingunola A, Hayden K, Baratzedah P, Scott K, et al. 2018. Estimates of exceedances of critical loads for acidifying deposition in Alberta and Saskatchewan. *Atmos Chem Phys.*:9897–9927. doi:10.5194/acp-18-9897-2018.
- Manzano CA, Marvin C, Muir D, Harner T, Martin J, Zhang Y. 2017. Heterocyclic Aromatics in Petroleum Coke, Snow, Lake Sediments, and Air Samples from the Athabasca Oil Sands Region. *Environ Sci Technol.* 51(10):5445–5453. doi:10.1021/acs.est.7b01345.
- Manzano CA, Muir D, Kirk J, Teixeira C, Siu M, Wang X, Charland JP, Schindler D, Kelly E. 2016. Temporal variation in the deposition of polycyclic aromatic compounds in snow in the Athabasca Oil Sands area of Alberta. *Environ Monit Assess.* 188(9). doi:10.1007/s10661-016-5500-3.
- Manzano CA, Muir D, Marvin C. 2016. Separation of thia-arenes and aza-arenes from polycyclic aromatics in snowpack samples from the Athabasca oil sands region by GCxGC/ToF-MS. *Int J Environ Anal Chem.* 96(10):905–920. doi:10.1080/03067319.2016.1220007
- McNaughton CS, Vandenberg J, Thiede P. 2019. Reanalysis of aerial deposition of metals and polycyclic aromatic compounds to snow in the Athabasca Oil Sands Region of Alberta Canada. *Sci Total Environ.* 682:692–708. doi:10.1016/j.scitotenv.2019.05.097.
- Mullan-Boudreau G, Belland R, Devito K, Noernberg T, Pelletier R, Shotyk W. 2017. Sphagnum Moss as an Indicator of Contemporary Rates of Atmospheric Dust Deposition in the Athabasca Bituminous Sands Region. *Environ Sci Technol.* 51(13):7422–7431. doi:10.1021/acs.est.6b06195.
- Mundy L.J., Bilodeau J.C., Schock D.M., Thomas P.J., Blais J.M., Pauli B.D. 2019. Using wood frog (*Lithobates sylvaticus*) tadpoles and semipermeable membrane devices to monitor polycyclic aromatic compounds in boreal wetlands in the oil sands region of northern Alberta, Canada. *Chemosphere.* 214:148-157. doi:10.1016/j.chemosphere.2018.09.034.
- Munkittrick KR, Arciszewski TJ. 2017. Using normal ranges for interpreting results of monitoring and tiering to guide future work: A case study of increasing polycyclic aromatic compounds in lake sediments from the Cold Lake oil sands (Alberta, Canada) described in Korosi et al. (2016). *Environ Pollut.* 231:1215–1222. doi:10.1016/j.envpol.2017.07.070.
- Mushet GR, Laird KR, Das B, Hesjedal B, Leavitt PR, Scott KA, Simpson GL, Wissel B, Wolfe JD, Cumming BF. 2017. Regional climate changes drive increased scaled-chrysophyte abundance in lakes downwind of Athabasca Oil Sands nitrogen emissions. *J Paleolimnol.* 58(3):419–435. doi:10.1007/s10933-017-9987-6.

- Neville LA, Patterson RT, Gammon P, Macumber AL. 2014. Relationship between ecological indicators (Arcellacea), total mercury concentrations and grain size in lakes within the Athabasca oil sands region, Alberta. *Environ Earth Sci.* 72(2):577–588. doi:10.1007/s12665-013-2979-6.
- Ohiozebau E, Tendler B, Hill A, Codling G, Kelly E, Giesy JP, Jones PD. 2016. Products of biotransformation of polycyclic aromatic hydrocarbons in fishes of the Athabasca/Slave river system, Canada. *Environ Geochem Health.* 38(2):577–591. doi:10.1007/s10653-015-9744-6.
- Parrott JL, Marentette JR, Hewitt LM, McMaster ME, Gillis PL, Norwood WP, Kirk JL, Peru KM, Headley J V., Wang Z, et al. 2018. Meltwater from snow contaminated by oil sands emissions is toxic to larval fish, but not spring river water. *Sci Total Environ.* 625:264–274. doi:10.1016/j.scitotenv.2017.12.284.
- Parsons BG, Watmough SA, Dillon PJ, Somers KM. 2010. A bioassessment of lakes in the Athabasca Oil Sands Region, Alberta, using benthic macroinvertebrates. *J Limnol.* 69(Suppl. 1):105–117. doi:10.3274/JL10-69-S1-11.
- Parsons BG, Watmough SA, Dillon PJ, Somers KM. 2010. Relationships between lake water chemistry and benthic macroinvertebrates in the Athabasca Oil Sands Region, Alberta. *J Limnol.* 69(Suppl. 1):118–125. doi:10.3274/JL10-69-S1-12.
- Percy, Jane. 2019. Harvesting Knowledge: Monitoring berries in the Athabasca Oil Sands region. <https://www12.statcan.gc.ca/census-recensement/2016/as-sa/98-200-x/2016022/98-200-x2016022-eng.cfm> [Accessed 2019 April 18]. Available from: <https://osmreport.ca/report/harvesting-knowledge/>
- Pilote M, André C, Turcotte P, Gagné F, Gagnon C. 2018. Metal bioaccumulation and biomarkers of effects in caged mussels exposed in the Athabasca oil sands area. *Sci Total Environ.* 610–611:377–390. doi:10.1016/j.scitotenv.2017.08.023.
- Proemse BC, Mayer B, Fenn ME, Ross CS. 2013. A multi-isotope approach for estimating industrial contributions to atmospheric nitrogen deposition in the Athabasca oil sands region in Alberta, Canada. *Environ Pollut.* 182:80–91. doi:10.1016/j.envpol.2013.07.004
- Proemse BC, Mayer B, Fenn ME. 2012. Tracing industrial sulfur contributions to atmospheric sulfate deposition in the Athabasca oil sands region, Alberta, Canada. *Appl Geochemistry.* 27(12):2425–2434. doi:10.1016/j.apgeochem.2012.08.006
- Shotyk W, Appleby PG, Bicalho B, Davies L, Froese D, Grant-Weaver I, Krachler M, Magnan G, Mullan-Boudreau G, Noernberg T, et al. 2016. Peat bogs in northern Alberta, Canada reveal decades of declining atmospheric Pb contamination. *Geophys Res Lett.* 43(18):9964–9974. doi:10.1002/2016GL070952.
- Shotyk W, Belland R, Duke J, Kempter H, Krachler M, Noernberg T, Pelletier R, Vile MA, Wieder K, Zacccone C, et al. 2014. Sphagnum mosses from 21 ombrotrophic bogs in the athabasca bituminous sands region show no significant atmospheric contamination of "heavy metals." *Environ Sci Technol.* 48(21):12603–12611. doi:10.1021/es503751v.
- Shotyk W, Bicalho B, Cuss CW, Duke MJM, Noernberg T, Pelletier R, Steinnes E, Zacccone C. 2016. Dust is the dominant source of "heavy metals" to peat moss (*Sphagnum fuscum*) in the bogs of the Athabasca Bituminous Sands region of northern Alberta. *Environ Int.* 92–93:494–506. doi:10.1016/j.envint.2016.03.018.
- Shotyk, W. and Cuss, C.W., 2019. Atmospheric Hg accumulation rates determined using *Sphagnum* moss from ombrotrophic (rain-fed) bogs in the Athabasca Bituminous Sands region of northern Alberta, Canada. *Ecological Indicators*, 107, p.105626.
- Skierszkan EK, Irvine G, Doyle JR, Kimpe LE, Blais JM. 2013. Is there widespread metal contamination from in-situ bitumen extraction at Cold Lake, Alberta heavy oil field? *Sci Total Environ.* 447:337–344. doi:10.1016/j.scitotenv.2012.12.097.
- Stachiw S, Bicalho B, Grant-Weaver I, Noernberg T, Shotyk W. 2019. Trace elements in berries collected near upgraders and open pit mines in the Athabasca Bituminous Sands Region (ABSR): Distinguishing atmospheric dust deposition from plant uptake. *Sci Total Environ.* 670:849–864. doi:10.1016/j.scitotenv.2019.03.238.

Studabaker WB, Krupa S, Jayanty RKM, Raymer JH. 2012. Measurement of Polynuclear Aromatic Hydrocarbons (PAHs) in Epiphytic Lichens for Receptor Modeling in the Athabasca Oil Sands Region (AOSR): A Pilot Study.

Summers JC, Kurek J, Kirk JL, Muir DCG, Wang X, Wiklund JA, Cooke CA, Evans MS, Smol JP. 2016. Recent warming, rather than industrial emissions of bioavailable nutrients, is the dominant driver of lake primary production shifts across the Athabasca Oil Sands Region. *PLoS One*. 11(5). doi:10.1371/journal.pone.0153987.

Vile MA, Kelman Wieder R, Živković T, Scott KD, Vitt DH, Hartsock JA, Iosue CL, Quinn JC, Petix M, Fillingim HM, et al. 2014. N<sub>2</sub>-fixation by methanotrophs sustains carbon and nitrogen accumulation in pristine peatlands. *Biogeochemistry*. 121(2):317–328. doi:10.1007/s10533-014-0019-6.

Watmough SA, Whitfield CJ, Fenn ME. 2014. The importance of atmospheric base cation deposition for preventing soil acidification in the Athabasca Oil Sands Region of Canada. *Sci Total Environ*. 493:1–11. doi:10.1016/j.scitotenv.2014.05.110

WBEA, 2014. Fort McKay Berry Focus Group Video. Available: <https://www.youtube.com/watch?v=F5pl6uPHJPc&t=657s>

Whaley CH, Makar PA, Shephard MW, Zhang L, Zhang J, Zheng Q, Akingunola A, Wentworth GR, Murphy JG, Kharol SK, et al. 2018. Contributions of natural and anthropogenic sources to ambient ammonia in the Athabasca Oil Sands and north-western Canada. *Atmos Chem Phys*. 18:2011–2034. doi.org/10.5194/acp-18-2011-2018.

Whitfield CJ, Aherne J, Watmough SA. 2009. Modeling soil acidification in the Athabasca oil sands region, Alberta, Canada. *Environ Sci Technol*. 43(15):5844–5850. doi:10.1021/es9005652.

Wieder RK, Vile MA, Albright CM, Scott KD, Vitt DH, Quinn JC, Burke-Scoll M. 2016. Effects of altered atmospheric nutrient deposition from Alberta oil sands development on Sphagnum fuscum growth and C, N and S accumulation in peat. *Biogeochemistry*. 129(1–2):1–19. doi:10.1007/s10533-016-0216-6.

Wieder RK, Vile MA, Scott KD, Albright CM, McMillen KJ, Vitt DH, Fenn ME. 2016. Differential Effects of High Atmospheric N and S Deposition on Bog Plant/Lichen Tissue and Porewater Chemistry across the Athabasca Oil Sands Region. *Environ Sci Technol*. 50(23):12630–12640. doi:10.1021/acs.est.6b03109.

Wieder RK, Vitt DH, Burke-Scoll M, Scott KD, House M, Vile MA. 2010. Nitrogen and sulphur deposition and the growth of Sphagnum fuscum in bogs of the Athabasca Oil Sands Region, Alberta. *J Limnol*. 69(SUPPL. 1):161–170. doi:10.3274/JL10-69-S1-16.

Wieder RK, Vitt DH, Vile MA, Graham JA, Hartsock JA, Fillingim H, House M, Quinn JC, Scott KD, Petix M, et al. 2019. Experimental nitrogen addition alters structure and function of a boreal bog: critical load and thresholds revealed. *Ecol Monogr*. 89(3):e01371. doi:10.1002/ecm.1371.

Wieder RK, Vitt DH, Vile MA, Graham JA, Hartsock JA, Popma JMA, Fillingim H, House M, Quinn JC, Scott KD, et al. 2020. Experimental nitrogen addition alters structure and function of a boreal poor fen: Implications for critical loads. *Sci Total Environ*. 733:138619. doi:10.1016/j.scitotenv.2020.138619.

Wiklund JA, Hall RI, Wolfe BB, Edwards TWD, Farwell AJ, Dixon DG. 2012. Has Alberta oil sands development increased far-field delivery of airborne contaminants to the Peace-Athabasca Delta? *Sci Total Environ*. 433:379–382. doi:10.1016/j.scitotenv.2012.06.074.

Willis CE, Kirk JL, St Louis VL, Lehnher I, Ariya PA, Rangel-Alvarado RB. 2018. Sources of Methylmercury to Snowpacks of the Alberta Oil Sands Region: A Study of in Situ Methylation and Particulates. *Environ Sci Technol*. 52(2):531–540. doi:10.1021/acs.est.7b04096.

Zhang L, Cheng I, Muir D, Charland JP. 2015. Scavenging ratios of polycyclic aromatic compounds in rain and snow in the Athabasca oil sands region. *Atmos Chem Phys*. 15(3):1421–1434. doi:10.5194/acp-15-1421-2015

Zhang L, Cheng I, Wu Z, Harner T, Schuster J, Charland J-P, Muir D, Parnis JM. 2015. Dry deposition of polycyclic aromatic compounds to various land covers in the Athabasca oil sands region. *J Adv Model Earth Syst*. 10:1–25. doi:10.1002/2017MS001065



Zhang Y, Shotyk W, Zaccone C, Noernberg T, Pelletier R, Bicalho B, Froese DG, Davies L, Martin JW. 2016. Airborne Petcoke Dust is a Major Source of Polycyclic Aromatic Hydrocarbons in the Athabasca Oil Sands Region. *Environ Sci Technol*. 50(4):1711–1720. doi:10.1021/acs.est.5b05092.

## Behaviour change

---

Barber QE, Parisien MA, Whitman E, Stralberg D, Johnson CJ, St-Laurent MH, DeLancey ER, Price DT, Arseneault D, Wang X, et al. 2018. Potential impacts of climate change on the habitat of boreal woodland caribou. *Ecosphere*. 9(10). doi:10.1002/ecs2.2472.

Kansas J, Charlebois M, Skatter H. 2015. Vegetation recovery on low impact seismic lines in Alberta's oil sands and visual obstruction of wolves and woodland caribou. *Can Wildl Biol Manag*. 4(2):137–149.

Latham ADM, Latham MC, Boyce MS, Boutin S. 2013. Spatial relationships of sympatric wolves (*Canis lupus*) and coyotes (*C. latrans*) with woodland caribou (*Rangifer tarandus caribou*) during the calving season in a human-modified boreal landscape. *Wildl Res*. 40(3):250-260. doi:10.1071/WR12184.

Latham ADM, Latham MC, Boyce MS. 2011. Habitat selection and spatial relationships of black bears (*Ursus americanus*) with woodland caribou (*Rangifer tarandus caribou*) in northeastern Alberta. *Can J Zool*. 89(4):267-277. doi:10.1139/z10-115.

Latham ADM, Latham MC, Mccutchen NA, Boutin S. 2011. Invading white-tailed deer change wolf-caribou dynamics in northeastern Alberta. *J Wildl Manage*. 75(1):204-212. doi:10.1002/jwmg.28.

Neilson EW, Boutin S. 2017. Human disturbance alters the predation rate of moose in the Athabasca oil sands. *Ecosphere*. 8(8):e01913. doi:10.1002/ecs2.1913.

UNESCO (United Nations Educational, Scientific and Cultural Organization). 2017. World Heritage Centre. International Union for Conservation. Mission Report. Reactive Monitoring Mission to Wood Buffalo National Park, Canada [Mission Report].

Wasser SK, Keim JL, Taper ML, Lele SR. 2011. The influences of wolf predation, habitat loss, and human activity on caribou and moose in the Alberta oil sands. *Frontiers in Ecology and the Environment*. 9(10):546-551. doi:10.1890/100071.

## Chemical and physical soil properties

---

Cho S, Dinwoodie G, Fu Y, Abboud S, Turchenek L. 2019. An assessment of long-term soil acidification trends in Alberta, Canada. *Ecol Indic*. 98(August 2018):712–722. doi:10.1016/j.ecolind.2018.11.020.

MacKenzie MD, Dietrich ST. 2020. Atmospheric sulfur and nitrogen deposition in the Athabasca oil sands region is correlated with foliar nutrient levels and soil chemical properties. *Sci Total Environ*. 711:134737. doi:10.1016/j.scitotenv.2019.134737.

Watmough SA, Bird A, McDonough A, Grimm E. 2019. Forest Fertilization Associated with Oil Sands Emissions. *Ecosystems*. 22(1):1–14. doi:10.1007/s10021-018-0249-x.

## Connectivity and barriers

---

Dunne BM, Quinn MS. 2009. Effectiveness of above-ground pipeline mitigation for moose (*Alces alces*) and other large mammals. *Biol Conserv.* 142(2):332–343. doi:10.1016/j.biocon.2008.10.029.

Muhly T, Serrouya R, Neilson E, Li H, Boutin S. 2015. Influence of in-situ oil sands development on caribou (*Rangifer tarandus*) movement. *PLoS One.* 10(9):e0136933. doi:10.1371/journal.pone.0136933.

### Contaminant exposure

Arens CJ, Arens JC, Hogan NS, Kavanagh RJ, Berrue F, Van Der Kraak GJ, van den Heuvel MR. 2017. Population impacts in white sucker (*Catostomus commersonii*) exposed to oil sands–derived contaminants in the Athabasca River. *Environ Toxicol Chem.* 36(8):2058–2067. doi:10.1002/etc.3735.

Bartels SF, Gendreau-Berthiaume B, Macdonald SE. 2019. The impact of atmospheric acid deposition on tree growth and forest understory vegetation in the Athabasca Oil Sands Region. *Sci Total Environ.* 696:133877. doi:10.1016/j.scitotenv.2019.133877.

Berger RG, Aslund MW, Sanders G, Charlebois M, Knopper LD, Bresee KE. 2016. A multiple lines of evidence approach for the ecological risk assessment of an accidental bitumen release from a steam assisted gravity drainage (SAGD) well in the Athabasca oil sands region. *Sci Total Environ.* 542:495–504. doi:10.1016/j.scitotenv.2015.10.050.

Boutin C, Carpenter DJ. 2017. Assessment of wetland/upland vegetation communities and evaluation of soil-plant contamination by polycyclic aromatic hydrocarbons and trace metals in regions near oil sands mining in Alberta. *Sci Total Environ.* 576:829–839. doi:10.1016/j.scitotenv.2016.10.062.

Brunet ND, Jardine TD, Jones PD, Macdermid F, Reed G, Bogdan AM, Tchir DR, Natcher DC. 2020. Towards indigenous community-led monitoring of fish in the oil sands region of Canada: Lessons at the intersection of cultural consensus and fish science. *Extr Ind Soc.* 7(4):1319–1329. doi:10.1016/j.exis.2020.06.014.

Cash KJ, Gibbons WN, Munkittrick KR, Brown SB, Carey J. 2000. Fish health in the peace, Athabasca and slave river systems. *J Aquat Ecosyst Stress Recover.* 8(1):77–86. doi:10.1023/A:1011495823504.

Cruz-Martinez L, Fernie KJ, Soos C, Harner T, Getachew F, Smits JEG. 2015. Detoxification, endocrine, and immune responses of tree swallow nestlings naturally exposed to air contaminants from the Alberta oil sands. *Sci Total Environ.* 502:8–15. doi:10.1016/j.scitotenv.2014.09.008.

Dolgova S, Popp BN, Courtoreille K, Espie RHM, Maclean B, McMaster M, Straka JR, Tetreault GR, Wilkie S, Hebert CE. 2018. Spatial trends in a biomagnifying contaminant: Application of amino acid compound-specific stable nitrogen isotope analysis to the interpretation of bird mercury levels. *Environ Toxicol Chem.* 37(5):1466–1475. doi:10.1002/etc.4113.

Donner MW, Cuss CW, Poesch M, Sinnatamby RN, Shotyk W, Siddique T. 2018. Selenium in surface waters of the lower Athabasca River watershed: Chemical speciation and implications for aquatic life. *Environ Pollut.* 243(Pt B):1343–1351. doi:10.1016/j.envpol.2018.09.067.

Eccles KM, Thomas PJ, Chan HM. 2020. Relationships between mercury concentrations in fur and stomach contents of river otter (*Lontra canadensis*) and mink (*Neovison vison*) in Northern Alberta Canada and their applications as proxies for environmental factors determining mercury bioavailability. *Environ Res.* 181:108961. doi:10.1016/j.envres.2019.108961.

Evans MS, McMaster M, Muir DCG, Parrott J, Tetreault GR, Keating J. 2019. Forage fish and polycyclic aromatic compounds in the Fort McMurray oil sands area: Body burden comparisons with environmental distributions and consumption guidelines. *Environ Pollut.* 255(Pt 2). doi:10.1016/j.envpol.2019.113135.

- Fernie KJ, Marteinson SC, Chen D, Eng A, Harner T, Smits JEG, Soos C. 2018. Elevated exposure, uptake and accumulation of polycyclic aromatic hydrocarbons by nestling tree swallows (*Tachycineta bicolor*) through multiple exposure routes in active mining-related areas of the Athabasca oil sands region. *Sci Total Environ.* 624:250-261. doi:10.1016/j.scitotenv.2017.12.123.
- Fernie KJ, Marteinson SC, Chen D, Palace V, Peters L, Soos C, Smits JEG. 2019. Changes in thyroid function of nestling tree swallows (*Tachycineta bicolor*) in relation to polycyclic aromatic compounds and other environmental stressors in the Athabasca Oil Sands Region. *Environ Res.* 169(November 2018):464–475. doi:10.1016/j.envres.2018.11.031.
- Fernie KJ, Marteinson SC, Soos C, Chen D, Cruz-Martinez L, Smits JEG. 2018. Reproductive and developmental changes in tree swallows (*Tachycineta bicolor*) are influenced by multiple stressors, including polycyclic aromatic compounds, in the Athabasca Oil Sands. *Environ Pollut.* 238:931-941. doi:10.1016/j.envpol.2018.03.074.
- Golzadeh N, Barst BD, Basu N, Baker JM, Auger JC, McKinney MA. 2020. Evaluating the concentrations of total mercury, methylmercury, selenium, and selenium:mercury molar ratios in traditional foods of the Bigstone Cree in Alberta, Canada. *Chemosphere.* 250:126285. doi:10.1016/j.chemosphere.2020.126285.
- Graney JR, Landis MS, Puckett KJ, Studabaker WB, Edgerton ES, Legge AH, Percy KE. 2017. Differential accumulation of PAHs, elements, and Pb isotopes by five lichen species from the Athabasca Oil Sands Region in Alberta, Canada. *Chemosphere.* 184:700-710. doi:10.1016/j.chemosphere.2017.06.036.
- Hebert CE, Campbell D, Kindopp R, MacMillan S, Martin P, Neugebauer E, Patterson L, Shatford J. 2013. Mercury trends in colonial waterbird eggs downstream of the oil sands region of Alberta, Canada. *Environ Sci Technol.* 47(20):11785-11792. doi:10.1021/es402542w.
- Hebert CE, Weseloh DVC, Macmillan S, Campbell D, Nordstrom W. 2011. Metals and polycyclic aromatic hydrocarbons in colonial waterbird eggs from Lake Athabasca and the Peace-Athabasca Delta, Canada. *Environ Toxicol Chem.* 30(5):1178-1183. doi:10.1002/etc.489.
- Hebert CE. 2019. The river runs through it: The Athabasca River delivers mercury to aquatic birds breeding far downstream. *PLoS One.* 14(4):1-19. doi:10.1371/journal.pone.0206192.
- Laxton DL, Watmough SA, Aherne J, Straker J. 2010. An assessment of nitrogen saturation in *Pinus banksiana* plots in the Athabasca Oil Sands Region, Alberta. 1.:171-180. doi:10.4081/jlimnol.2010.s1.171.
- Lundin JI, Riffell JA, Wasser SK. 2015. Polycyclic aromatic hydrocarbons in caribou, moose, and wolf scat samples from three areas of the Alberta oil sands. *Environ Pollut.* 206:527-534. doi:10.1016/j.envpol.2015.07.035.
- MacKenzie MD, Dietrich ST. 2020. Atmospheric sulfur and nitrogen deposition in the Athabasca oil sands region is correlated with foliar nutrient levels and soil chemical properties. *Sci Total Environ.* 711:134737. doi:10.1016/j.scitotenv.2019.134737.
- McMaster M, Parrott J, Bartlett A, Gagne F, Evans M, Tetreault G, Keith H, Gee J. 2018. Aquatic Ecosystem Health Assessment of the Athabasca River Mainstem and Series Tributaries Using Fish Health and Fish and Invertebrate Toxicological Testing. *Oil Sands Monit Progr Tech Rep Ser. No. 1.8:76 pages.*
- Mundy L.J., Bilodeau J.C., Schock D.M., Thomas P.J., Blais J.M., Pauli B.D. 2019. Using wood frog (*Lithobates sylvaticus*) tadpoles and semipermeable membrane devices to monitor polycyclic aromatic compounds in boreal wetlands in the oil sands region of northern Alberta, Canada. *Chemosphere.* 214:148-157. doi:10.1016/j.chemosphere.2018.09.034.
- Ohiozebau E, Tendler B, Codling G, Kelly E, Giesy JP, Jones PD. 2017. Potential health risks posed by polycyclic aromatic hydrocarbons in muscle tissues of fishes from the Athabasca and Slave Rivers, Canada. *Environ Geochem Health.* 39(1):139–160. doi:10.1007/s10653-016-9815-3.

- Ohiozebau E, Tendler B, Hill A, Codling G, Kelly E, Giesy JP, Jones PD. 2016. Products of biotransformation of polycyclic aromatic hydrocarbons in fishes of the Athabasca/Slave river system, Canada. *Environ Geochem Health*. 38(2):577–591. doi:10.1007/s10653-015-9744-6.
- Pilote M, André C, Turcotte P, Gagné F, Gagnon C. 2018. Metal bioaccumulation and biomarkers of effects in caged mussels exposed in the Athabasca oil sands area. *Sci Total Environ*. 610–611:377–390. doi:10.1016/j.scitotenv.2017.08.023.
- Proemse BC, Maynard DG, Mayer B. 2016. Foliage Chemistry of *Pinus baksiana* in the Athabasca Oil Sands Region, Alberta, Canada. *Forests*. 7(12):312. doi:10.3390/f7120312.
- Shotyk W, Bicalho B, Cuss CW, Grant-Weaver I, Nagel A, Noernberg T, Poesch M, Sinnatamby NR. 2019. Bioaccumulation of TI in otoliths of Trout-perch (*Percopsis omiscomaycus*) from the Athabasca River, upstream and downstream of bitumen mining and upgrading. *Sci Total Environ*. 650:2559–2566. doi:10.1016/j.scitotenv.2018.09.318.
- Sinnatamby RN, Loewen TN, Luo Y, Pearson DG, Bicalho B, Grant-Weaver I, Cuss CW, Poesch M, Shotyk W. 2019. Spatial assessment of major and trace element concentrations from Lower Athabasca Region Trout-perch (*Percopsis omiscomaycus*) otoliths. *Sci Total Environ*. 655:363–373. doi:10.1016/j.scitotenv.2018.11.168.
- Tendler B, Ohiozebau E, Codling G, Giesy JP, Jones PD. 2020. Concentrations of Metals in Fishes from the Athabasca and Slave Rivers of Northern Canada. *Environ Toxicol Chem*. 39(11):2180–2195. doi:10.1002/etc.4852.
- Thomas PJ, Eccles KM, Mundy LJ. 2017. Spatial modelling of non-target exposure to anticoagulant rodenticides can inform mitigation options in two boreal predators inhabiting areas with intensive oil and gas development. *Biol Conserv*. 212:111–119. doi:10.1016/j.biocon.2017.06.005.
- Thomas PJ, Newell EE, Eccles K, Holloway AC, Idowu I, Xia Z, Hassan E, Tomy G, Quenneville C. 2021. Co-exposures to trace elements and polycyclic aromatic compounds (PACs) impacts North American river otter (*Lontra canadensis*) baculum. *Chemosphere*. 265:128920. doi:10.1016/j.chemosphere.2020.128920.
- Watmough SA, Bird A, McDonough A, Grimm E. 2019. Forest Fertilization Associated with Oil Sands Emissions. *Ecosystems*. 22(1):1–14. doi:10.1007/s10021-018-0249-x.
- Wayland M, Headley J V., Peru KM, Crosley R, Brownlee BG. 2008. Levels of polycyclic aromatic hydrocarbons and dibenzothiophenes in wetland sediments and aquatic insects in the oil sands area of Northeastern Alberta, Canada. In: *Environmental Monitoring and Assessment*. Vol. 136. Environ Monit Assess. p. 167–182.
- Xia Z, Idowu I, Marvin C, Thomas PJ, Johnson W, Francisco O, Stetefeld J, Crimmins B, Fry M, Tomy GT. 2019. Identification of halogenated polycyclic aromatic hydrocarbons in biological samples from Alberta Oil-Sands Region. *Chemosphere*. 215:206–213. doi:10.1016/j.chemosphere.2018.10.050.

## Habitat loss and change

---

- Ball J, Sólymos P, Schmiegelow F, Hache S, Schieck J, Bayne E. 2016. Regional habitat needs of a nationally listed species, Canada Warbler (*Cardellina canadensis*), in Alberta, Canada. *Avian Conservation and Ecology*. 11(2):10. doi:10.5751/ACE-00916-110210.
- Bawden AJ, Linton HC, Burn DH, Prowse TD. 2014. A spatiotemporal analysis of hydrological trends and variability in the Athabasca River region, Canada. *J Hydrol*. 509:333–342. doi:10.1016/j.jhydrol.2013.11.051.
- Cadieux P, Boulanger Y, Cyr D, Taylor AR, Price DT, Sólymos P, Stralberg D, Chen H, Brecka A, Tremblay JA. 2020. Projected effects of climate change on boreal bird community accentuated by anthropogenic disturbances in western boreal forest, Canada. *Divers Distrib*.:1–15. doi:10.1111/ddi.13057.

- Culp, J. C., Glozier, N. E., Baird D. J., Baird, Wrona, F. J., Brua, R. B., Ritcey A. L., Peters D. L., Casey. R., Choung, C. B., Curry, C. J., Halliwell, D., Keet, E., Kilgour, B., Kirk, J., Lento, J., Luiker, E. & C. Suzanne. 2018. Assessing ecosystem health in benthic macroinvertebrate assemblages of the Athabasca river mainstem, tributaries, and Peace-Athabasca Delta. Oil Sands Monitoring Technical Report Series No. 1.7. 82 p.
- Ficken CD, Cobbaert D, Rooney RC. 2019. Low extent but high impact of human land use on wetland flora across the boreal oil sands region. *Sci Total Environ.* 693:133647. doi:10.1016/j.scitotenv.2019.133647.
- Hedley RW, McLeod LJT, Yip DA, Farr D, Knaga P, Drake KL, Bayne E. 2020. Modeling the occurrence of the yellow rail (*Coturnicops noveboracensis*) in the context of ongoing resource development in the oil sands region of alberta. *Avian Conserv Ecol.* 15(1):1–14. doi:10.5751/ACE-01538-150110.
- Morissette JL, Bayne EM, Kardynal KJ, Hobson KA. 2019. Regional variation in responses of wetland-associated bird communities to conversion of boreal forest to agriculture. *Avian Conserv Ecol.* 14(1). doi:10.5751/ACE-01355-140112.
- Sauchyn DJ, St-Jacques JM, Luckman BH. 2015. Long-term reliability of the Athabasca River (Alberta, Canada) as the water source for oil sands mining. *Proc Natl Acad Sci U S A.* 112(41):12621–12626. doi:10.1073/pnas.1509726112.
- Schwalb AN, Alexander AC, Paul AJ, Cottenie K, Rasmussen JB. 2015. Changes in migratory fish communities and their health, hydrology, and water chemistry in rivers of the Athabasca oil sands region: A review of historical and current data. *Environ Rev.* 23(2):133–150. doi:10.1139/er-2014-0065.
- Tattersall ER, Burgar JM, Fisher JT, Burton AC. 2020. Mammal seismic line use varies with restoration: Applying habitat restoration to species at risk conservation in a working landscape. *Biol Conserv.* 241:108295. doi:10.1016/j.biocon.2019.108295.
- Van Wilgenburg S, Hobson K, Bayne E, Koper N. 2013. Estimated Avian Nest Loss Associated with Oil and Gas Exploration and Extraction in the Western Canadian Sedimentary Basin. *Avian Conservation and Ecology.* 8(2). doi:10.5751/ACE-00585-080209.
- Ward EM, Gorelick SM. 2018. Drying drives decline in muskrat population in the Peace-Athabasca Delta, Canada. *Environ Res Lett.* 13(12):124026. doi:10.1088/1748-9326/aaf0ec.
- Wilson SJ, Bayne EM. 2018. Use of an acoustic location system to understand how presence of conspecifics and canopy cover influence ovenbird (*Seiurus aurocapilla*) space use near reclaimed wellsites in the boreal forest of alberta. *Avian Conserv Ecol.* 13(2). doi:10.5751/ACE-01248-130204.
- Wolfe BB, Hall RI, Edwards TWD, Johnston JW. 2012. Developing temporal hydroecological perspectives to inform stewardship of a northern floodplain landscape subject to multiple stressors: Paleolimnological investigations of the Peace-Athabasca Delta. *Environ Rev.* 20(3):191–210. doi:10.1139/a2012-008.

## Invasive species

---

- Boutin C, Carpenter DJ. 2017. Assessment of wetland/upland vegetation communities and evaluation of soil-plant contamination by polycyclic aromatic hydrocarbons and trace metals in regions near oil sands mining in Alberta. *Sci Total Environ.* 576:829–839. doi:10.1016/j.scitotenv.2016.10.062.
- Cameron EK, Bayne EM. 2009. Road age and its importance in earthworm invasion of northern boreal forests. *J Appl Ecol.* 46(1):28–36. doi:10.1111/j.1365-2664.2008.01535.x.
- Mayor SJ, Cahill JF, He F, Sólymos P, Boutin S. 2012. Regional boreal biodiversity peaks at intermediate human disturbance. *Nat Commun.* 3:1142. doi:10.1038/ncomms2145.

UNESCO (United Nations Educational, Scientific and Cultural Organization). 2017. World Heritage Centre. International Union for Conservation. Mission Report. Reactive Monitoring Mission to Wood Buffalo National Park, Canada [Mission Report].

## Resource availability

---

Latham ADM, Latham MC, Boyce MS, Boutin S. 2013. Spatial relationships of sympatric wolves (*Canis lupus*) and coyotes (*C. latrans*) with woodland caribou (*Rangifer tarandus caribou*) during the calving season in a human-modified boreal landscape. *Wildl Res.* 40(3):250-260. doi:10.1071/WR12184.

Latham ADM, Latham MC, Knopff KH, Hebblewhite M, Boutin S. 2013. Wolves, white-tailed deer, and beaver: Implications of seasonal prey switching for woodland caribou declines. *Ecography (Cop)*. 36(12):1276–1290. doi:10.1111/j.1600-0587.2013.00035.x.

Roberts D, Ciuti S, Barber QE, Willier C, Nielsen SE. 2018. Accelerated seed dispersal along linear disturbances in the Canadian oil sands region. *Scientific Reports*. 8(1):4828. doi:10.1038/s41598-018-22678-y.

Stern ER, Riva F, Nielsen SE. 2018. Effects of Narrow Linear Disturbances on Light and Wind Patterns in Fragmented Boreal Forests in Northeastern Alberta. *Forests*. 9(8):486. doi:10.3390/f9080486.

## Surface water and sediment quality

---

Adamache, Lori, Spink, David. 2012. Cumulative Effects: Concerns of Fort McKay regarding the impacts of emissions to air from industrial development. Prepared for the Fort McKay Sustainability Department. September 2012.

Ahad JME, Pakdel H, Savard MM, Calderhead AI, Gammon PR, Rivera A, Peru KM, Headley J V. 2013. Characterization and quantification of mining-related "naphthenic acids" in groundwater near a major oil sands tailings pond. *Environ Sci Technol*. 47(10):5023–5030. doi:10.1021/es3051313.

Alexander AC, Chambers PA, Jeffries DS. 2017. Episodic acidification of 5 rivers in Canada's oil sands during snowmelt: A 25-year record. *Sci Total Environ*. 599–600:739–749. doi:10.1016/j.scitotenv.2017.04.207.

Alexander AC, Levenstein B, Sanderson LA, Blukacz-Richards EA, Chambers PA. 2020. How does climate variability affect water quality dynamics in Canada's oil sands region? *Sci Total Environ*. 732:139062. doi:10.1016/j.scitotenv.2020.139062.

Arciszewski TJ, Hazewinkel RR, Munkittrick KR, Kilgour BW. 2018. Developing and applying control charts to detect changes in water chemistry parameters measured in the Athabasca River near the oil sands: A tool for surveillance monitoring. *Environ Toxicol Chem*. 37(9):2296–2311. doi:10.1002/etc.4168.

Arciszewski TJ, Munkittrick KR, Kilgour BW, Keith HM, Linehan JE, McMaster ME. 2017. Increased size and relative abundance of migratory fishes observed near the Athabasca oil sands. *Facets*. 2(2):833–858. doi:10.1139/facets-2017-0028.

Arens CJ, Arens JC, Hogan NS, Kavanagh RJ, Berrue F, Van Der Kraak GJ, van den Heuvel MR. 2017. Population impacts in white sucker (*Catostomus commersonii*) exposed to oil sands–derived contaminants in the Athabasca River. *Environ Toxicol Chem*. 36(8):2058–2067. doi:10.1002/etc.3735.

Birks SJ, Cho S, Taylor E, Yi Y, Gibson JJ. 2017. Characterizing the PAHs in surface waters and snow in the Athabasca region: Implications for identifying hydrological pathways of atmospheric deposition. *Sci Total Environ*. 603–604:570–583. doi:10.1016/j.scitotenv.2017.06.051.

- Brunet, Nicolas D., Jardine, Timothy D., Jones, Paul D., Macdermid, Findlay, Reed, Graeme, Bogdan, Ana-Maria, Tchir, Devan R., Natcher, David C. 2020. Towards Indigenous community-led monitoring of fish in the oil sands region of Canada: Lessons at the intersection of cultural consensus and fish science. *The Extractive Industries and Society*. <https://doi.org/10.1016/j.exis.2020.06.014>
- Candler, C., Olson, R., DeRoy, S., Athabasca Chipewyan First Nation and Mikisew Cree Nation. 2010. *As long as the rivers flow: Athabasca River knowledge, use and change*. Edmonton, Alberta: Park Institute.
- Candler, Craig, Gibson, Ginger, Mikisew Cree First Nation. 2015. *Wîyôw'tam'kitaskino (Our Land is Rich): A Mikisew Cree culture & rights assessment for the proposed Teck Frontier project update*. Prepared for Mikisew Cree First Nation.
- Chibwe L, Manzano CA, Muir D, Atkinson B, Kirk JL, Marvin CH, Wang X, Teixeira C, Shang D, Harner T, et al. 2019. Deposition and Source Identification of Nitrogen Heterocyclic Polycyclic Aromatic Compounds in Snow, Sediment, and Air Samples from the Athabasca Oil Sands Region. *Environ Sci Technol*. 53(6):2981–2989. doi:10.1021/acs.est.8b06175.
- Chibwe, L., Roberts, S., Shang, D., Yang, F., Manzano, C.A., Wang, X., Kirk, J.L. and Muir, D.C., 2020. A one-century sedimentary record of N-and S-polycyclic aromatic compounds in the Athabasca oil sands region in Canada. *Chemosphere*, 260, p.127641.
- Conly FM, Crosley RW, Headley J V., Quagraine EK. 2007. Assessment of metals in bed and suspended sediments in tributaries of the Lower Athabasca River. *J Environ Sci Heal - Part A Toxic/Hazardous Subst Environ Eng*. 42(8):1021–1028. doi:10.1080/10934520701418433.
- Cooke CA, Kirk JL, Muir DCG, Wiklund JA, Wang X, Gleason A, Evans MS. 2017. Spatial and temporal patterns in trace element deposition to lakes in the Athabasca oil sands region (Alberta, Canada). *Environ Res Lett*. 12(12):26. doi:10.1088/1748-9326/aa9505.
- Culp, J. C., Glozier, N. E., Baird D. J., Baird, Wrona, F. J., Brua, R. B., Ritcey A. L., Peters D. L., Casey. R., Choung, C. B., Curry, C. J., Halliwell, D., Keet, E., Kilgour, B., Kirk, J., Lento, J., Luiker, E. & C. Suzanne. 2018. Assessing ecosystem health in benthic macroinvertebrate assemblages of the Athabasca river mainstem, tributaries, and Peace-Athabasca Delta. *Oil Sands Monitoring Technical Report Series No. 1.7*. 82 p.
- Curtis CJ, Roger F, Neil R, Shilland J, Simpson GL, Turner S, Yang H, Pla S. 2010. Palaeolimnological assessment of lake acidification and environmental change in the Athabasca Oil Sands Region, Alberta. *J Limnol*. 69(SUPPL. 1):92–104. doi:10.3274/JL10-69-S1-10.
- Donner MW, Bicalho B, Noernberg T, Shotyck W. 2019. Contemporary and Historical Atmospheric Deposition of Arsenic and Selenium in the Athabasca Bituminous Sands Region. *Environ Sci Technol*. 53(23):14020–14028. doi:10.1021/acs.est.9b02718.
- Donner MW, Bicalho B, Sinn C, Shotyck W. 2018. Selenium and sulphur in Athabasca bituminous sands mineral and bitumen fractions. *Fuel*. 224:718–725. doi:10.1016/j.fuel.2018.03.093.
- Donner MW, Cuss CW, Poesch M, Sinnatamby RN, Shotyck W, Siddique T. 2018. Selenium in surface waters of the lower Athabasca River watershed: Chemical speciation and implications for aquatic life. *Environ Pollut*. 243(Pt B):1343–1351. doi:10.1016/j.envpol.2018.09.067.
- Donner MW, Javed MB, Shotyck W, Francesconi KA, Siddique T. 2017. Arsenic speciation in the lower Athabasca River watershed: A geochemical investigation of the dissolved and particulate phases. *Environ Pollut*. 224:265–274.
- Droppo IG, D'Andrea L, Krishnappan BG, Jaskot C, Trapp B, Basuvaraj M, Liss SN. 2015. Fine-sediment dynamics: towards an improved understanding of sediment erosion and transport. *J Soils Sediments*. 15(2):467–479. doi:10.1007/s11368-014-1004-3.
- Droppo IG, di Cenzo P, Parrott J, Power J. 2019. The Alberta oil sands eroded bitumen/sediment transitional journey: Influence on sediment transport dynamics, PAH signatures and toxicological effect. *Sci Total Environ*. 677:718–731. doi:10.1016/j.scitotenv.2019.04.313.

- Droppo IG, di Cenzo P, Power J, Jaskot C, Chambers PA, Alexander AC, Kirk J, Muir D. 2018. Temporal and spatial trends in riverine suspended sediment and associated polycyclic aromatic compounds (PAC) within the Athabasca oil sands region. *Sci Total Environ.* 626:1382–1393. doi:10.1016/j.scitotenv.2018.01.105.
- Dubé MG, Wilson JE. 2013. Accumulated state assessment of the Peace-Athabasca-Slave River system. *Integr Environ Assess Manag.* 9(3):405–425. doi:10.1002/ieam.1354.
- Emmerton CA, Cooke CA, Wentworth GR, Graydon JA, Ryjkov A, Dastoor A. 2018. Total Mercury and Methylmercury in Lake Water of Canada's Oil Sands Region. *Environ Sci Technol.* 52(19):10946–10955. doi:10.1021/acs.est.8b01680.
- Evans M, Davies M, Janzen K, Muir D, Hazewinkel R, Kirk J, De Boer D. 2016. PAH distributions in sediments in the oil sands monitoring area and western Lake Athabasca: Concentration, composition and diagnostic ratios. *Environ Pollut.* 213:671–687. doi:10.1016/j.envpol.2016.03.014.
- Gagné F, André C, Turcotte P, Gagnon C. 2016. Comparative toxicity of selected naphthenic acids, oil sands processed water and surface waters in rainbow trout hepatocytes: A gene expression study. *SOJ Biochem.* 2(3):1–13. doi:10.15226/2376-4589/2/3/00116.
- Gerner N V, Koné M, Ross MS, Pereira A, Ulrich AC, Martin JW, Liess M. 2017. Stream invertebrate community structure at Canadian oil sands development is linked to concentration of bitumen-derived contaminants. *Sci Total Environ.* 575:1005–1013. doi:10.1016/j.scitotenv.2016.09.169.
- Glozier, N.E., Pippy, K., Levesque L., Ritcey, A., Armstrong, B., Tobin, O., Cooke, C.A., Conly, M., Dirk, L., Epp, C., Gue, A., Hazewinkel, R., Keet, E., Lindeman, D., Maines, J., Syrgiannis, J., Su, M. & V. Tumber. 2018. Surface Water Quality of the Athabasca, Peace and Slave Rivers and Riverine Waterbodies within the Peace-Athabasca Delta. Oil Sands Monitoring Program Technical Report Series No. 1.4. 64 p.
- Independent Environmental Consultants (IEC). 2018. Milestone 2: Draft Report. Strategic Environmental Assessment of Wood Buffalo National Park World Heritage Site.
- Jautzy J, Ahad JME, Gobeil C, Savard MM. 2013. Century-long source apportionment of PAHs in athabasca oil sands region lakes using diagnostic ratios and compound-specific carbon isotope signatures. *Environ Sci Technol.* 47(12):6155–6163. doi:10.1021/es400642e.
- Jautzy JJ, Ahad JME, Hall RI, Wiklund JA, Wolfe BB, Gobeil C, Savard MM. 2015. Source Apportionment of Background PAHs in the Peace-Athabasca Delta (Alberta, Canada) Using Molecular Level Radiocarbon Analysis. *Environ Sci Technol.* 49(15):9056–9063. doi:10.1021/acs.est.5b01490.
- Kay ML, Wiklund JA, Remmer CR, Owca TJ, Klemt WH, Neary LK, Brown K, MacDonald E, Thomson K, Vucic JM, et al. 2020. Evaluating temporal patterns of metals concentrations in floodplain lakes of the Athabasca Delta (Canada) relative to pre-industrial baselines. *Sci Total Environ.* 704:135309. doi:10.1016/j.scitotenv.2019.135309.
- Kelly EN, Schindler DW, Hodson P V., Short JW, Radmanovich R, Nielsen CC. 2010. Oil sands development contributes elements toxic at low concentrations to the Athabasca River and its tributaries. *Proc Natl Acad Sci U S A.* 107(37):16178–16183. doi:10.1073/pnas.1008754107.
- Kelly EN, Short JW, Schindler DW, Hodson P V., Ma M, Kwan AK, Fortin BL. 2009. Oil sands development contributes polycyclic aromatic compounds to the Athabasca River and its tributaries. *Proc Natl Acad Sci U S A.* 106(52):22346–22351. doi:10.1073/pnas.0912050106.
- Kirk JL, Muir DCG, Gleason A, Wang X, Lawson G, Frank RA, Lehnerr I, Wrona F. 2014. Atmospheric deposition of mercury and methylmercury to landscapes and waterbodies of the athabasca oil sands region. *Environ Sci Technol.* 48(13):7374–7383. doi:10.1021/es500986r.
- Klemt WH, Kay ML, Wiklund JA, Wolfe BB, Hall RI. 2020. Assessment of vanadium and nickel enrichment in Lower Athabasca River floodplain lake sediment within the Athabasca Oil Sands Region (Canada). *Environ Pollut.* 265:114920. doi:10.1016/j.envpol.2020.114920.



- Kurek J, Kirk JL, Muir DCG, Wang X, Evans MS, Smol JP. 2013. Legacy of a half century of Athabasca oil sands development recorded by lake ecosystems. *Proc Natl Acad Sci.* 110(5):1761–1766. doi:10.1073/pnas.1217675110.
- MCFN (Mikisew Cree First Nation). 2015. Community-based monitoring program. Polycyclic aromatic hydrocarbons (PAH) levels in the Lower Athabasca River and Peace Athabasca Delta.
- MCFN (Mikisew Cree First Nation). 2016. Written brief of the Mikisew Cree First Nation to the Standing on Environment & Sustainable Development. [Accessed 2016 May 7]. House of Commons Canada, November 15, 2016. Available from: [www.ourcommons.ca](http://www.ourcommons.ca).
- Mundy L.J., Bilodeau J.C., Schock D.M., Thomas P.J., Blais J.M., Pauli B.D. 2019. Using wood frog (*Lithobates sylvaticus*) tadpoles and semipermeable membrane devices to monitor polycyclic aromatic compounds in boreal wetlands in the oil sands region of northern Alberta, Canada. *Chemosphere.* 214:148-157. doi:10.1016/j.chemosphere.2018.09.034.
- Parrott JL, Marentette JR, Hewitt LM, McMaster ME, Gillis PL, Norwood WP, Kirk JL, Peru KM, Headley J V., Wang Z, et al. 2018. Meltwater from snow contaminated by oil sands emissions is toxic to larval fish, but not spring river water. *Sci Total Environ.* 625:264–274. doi:10.1016/j.scitotenv.2017.12.284.
- Pilote M, André C, Turcotte P, Gagné F, Gagnon C. 2018. Metal bioaccumulation and biomarkers of effects in caged mussels exposed in the Athabasca oil sands area. *Sci Total Environ.* 610–611:377–390. doi:10.1016/j.scitotenv.2017.08.023.
- Ross MS, Pereira ADS, Fennell J, Davies M, Johnson J, Sliva L, Martin JW. 2012. Quantitative and qualitative analysis of naphthenic acids in natural waters surrounding the Canadian oil sands industry. *Environ Sci Technol.* 46(23):12796–12805. doi:10.1021/es303432u.
- Schwalb AN, Alexander AC, Paul AJ, Cottenie K, Rasmussen JB. 2015. Changes in migratory fish communities and their health, hydrology, and water chemistry in rivers of the Athabasca oil sands region: A review of historical and current data. *Environ Rev.* 23(2):133–150. doi:10.1139/er-2014-0065.
- Seitz NE, Westbrook CJ, Dubé MG, Squires AJ. 2013. Assessing large spatial scale landscape change effects on water quality and quantity response in the lower Athabasca River basin. *Integr Environ Assess Manag.* 9(3):392–404. doi:10.1002/ieam.1336.
- Sun C, Shotyk W, Cuss CW, Donner MW, Fennell J, Javed M, Noernberg T, Poesch M, Pelletier R, Sinnatamby N, et al. 2017. Characterization of Naphthenic Acids and Other Dissolved Organics in Natural Water from the Athabasca Oil Sands Region, Canada. *Environ Sci Technol.* 51(17):9524–9532. doi:10.1021/acs.est.7b02082.
- Timoney KP, Lee P. 2009. Does the Alberta Tar Sands Industry Pollute? The Scientific Evidence. *Open Conserv Biol J.* 3(1):65–81. doi:10.2174/1874839200903010065.
- Timoney KP, Lee P. 2011. Polycyclic aromatic hydrocarbons increase in Athabasca river delta sediment: Temporal trends and environmental correlates. *Environ Sci Technol.* 45(10):4278–4284. doi:10.1021/es104375d.
- Willis CE, Kirk JL, St Louis VL, Lehnerr I, Ariya PA, Rangel-Alvarado RB. 2018. Sources of Methylmercury to Snowpacks of the Alberta Oil Sands Region: A Study of in Situ Methylation and Particulates. *Environ Sci Technol.* 52(2):531–540. doi:10.1021/acs.est.7b04096.

## Surface water levels, flow & supply

---

- Bawden AJ, Linton HC, Burn DH, Prowse TD. 2014. A spatiotemporal analysis of hydrological trends and variability in the Athabasca River region, Canada. *J Hydrol.* 509:333–342. doi:10.1016/j.jhydrol.2013.11.051.
- Candler, C., Olson, R., DeRoy, S., Athabasca Chipewyan First Nation and Mikisew Cree Nation. 2010. *As long as the rivers flow: Athabasca River knowledge, use and change.* Edmonton, Alberta: Park Institute.

Carver, M., MacLean, B. 2016. Community-based water-depth monitoring in the Peace-Athabasca Delta: Insights and evaluation. Prepared for Athabasca Chipewyan First Nation and Mikisew Cree First Nation.

Gerner N V, Koné M, Ross MS, Pereira A, Ulrich AC, Martin JW, Liess M. 2017. Stream invertebrate community structure at Canadian oil sands development is linked to concentration of bitumen-derived contaminants. *Sci Total Environ.* 575:1005–1013. doi:10.1016/j.scitotenv.2016.09.169.

Independent Environmental Consultants (IEC). 2018. Milestone 2: Draft Report. Strategic Environmental Assessment of Wood Buffalo National Park World Heritage Site.

Monk WA, Peters DL, Baird DJ. 2012. Assessment of ecologically relevant hydrological variables influencing a cold-region river and its delta: The Athabasca River and the Peace-Athabasca Delta, northwestern Canada. *Hydrological Processes.* 26(12):1827–1839. doi:10.1002/hyp.9307.

Sauchyn DJ, St-Jacques JM, Luckman BH. 2015. Long-term reliability of the Athabasca River (Alberta, Canada) as the water source for oil sands mining. *Proc Natl Acad Sci U S A.* 112(41):12621–12626. doi:10.1073/pnas.1509726112.

Schwalb AN, Alexander AC, Paul AJ, Cottenie K, Rasmussen JB. 2015. Changes in migratory fish communities and their health, hydrology, and water chemistry in rivers of the Athabasca oil sands region: A review of historical and current data. *Environ Rev.* 23(2):133–150. doi:10.1139/er-2014-0065.

Squires AJ, Dubé MG. 2013. Development of an effects-based approach for watershed scale aquatic cumulative effects assessment. *Integr Environ Assess Manag.* 9(3):380–391. doi:10.1002/ieam.1352.

Wiklund JA, Hall RI, Wolfe BB. 2012. Timescales of hydrolimnological change in floodplain lakes of the Peace-Athabasca Delta, northern Alberta, Canada. *Ecohydrology.* 5(3):351–367. doi:10.1002/eco.226.

Wolfe BB, Hall RI, Edwards TWD, Johnston JW. 2012. Developing temporal hydroecological perspectives to inform stewardship of a northern floodplain landscape subject to multiple stressors: Paleolimnological investigations of the Peace-Athabasca Delta. *Environ Rev.* 20(3):191–210. doi:10.1139/a2012-008.

Wolfe BB, Hall RI, Edwards TWD, Vardy SR, Falcone MD, Sjunneskog C, Sylvestre F, McGowan S, Leavitt PR, van Driel P. 2008. Hydroecological responses of the Athabasca Delta, Canada, to changes in river flow and climate during the 20th century. *Ecohydrology.* 1(2):131–148. doi:10.1002/eco.13.

## Transport and transformation

---

Ahad JME, Pakdel H, Savard MM, Calderhead AI, Gammon PR, Rivera A, Peru KM, Headley J V. 2013. Characterization and quantification of mining-related "naphthenic acids" in groundwater near a major oil sands tailings pond. *Environ Sci Technol.* 47(10):5023–5030. doi:10.1021/es3051313.

Akre CJ, Headley J V., Conly FM, Peru KM, Dickson LC. 2004. Spatial Patterns of Natural Polycyclic Aromatic Hydrocarbons in Sediment in the Lower Athabasca River. *J Environ Sci Heal - Part A Toxic/Hazardous Subst Environ Eng.* 39(5):1163–1176. doi:10.1081/ESE-120030301.

Alexander AC, Chambers PA, Jeffries DS. 2017. Episodic acidification of 5 rivers in Canada's oil sands during snowmelt: A 25-year record. *Sci Total Environ.* 599–600:739–749. doi:10.1016/j.scitotenv.2017.04.207.

Alexander AC, Chambers PA. 2016. Assessment of seven Canadian rivers in relation to stages in oil sands industrial development, 1972-2010. *Environ Rev.* 24(4):484–494. doi:10.1139/er-2016-0033.

Alexander AC, Levenstein B, Sanderson LA, Blukacz-Richards EA, Chambers PA. 2020. How does climate variability affect water quality dynamics in Canada's oil sands region? *Sci Total Environ.* 732:139062. doi:10.1016/j.scitotenv.2020.139062.

- Arciszewski TJ, Munkittrick KR, Kilgour BW, Keith HM, Linehan JE, McMaster ME. 2017. Increased size and relative abundance of migratory fishes observed near the Athabasca oil sands. *Facets*. 2(2):833–858. doi:10.1139/facets-2017-0028.
- Arens CJ, Arens JC, Hogan NS, Kavanagh RJ, Berrue F, Van Der Kraak GJ, van den Heuvel MR. 2017. Population impacts in white sucker (*Catostomus commersonii*) exposed to oil sands–derived contaminants in the Athabasca River. *Environ Toxicol Chem*. 36(8):2058–2067. doi:10.1002/etc.3735.
- Birks SJ, Cho S, Taylor E, Yi Y, Gibson JJ. 2017. Characterizing the PAHs in surface waters and snow in the Athabasca region: Implications for identifying hydrological pathways of atmospheric deposition. *Sci Total Environ*. 603–604:570–583. doi:10.1016/j.scitotenv.2017.06.051.
- Conly FM, Crosley RW, Headley J V., Quagraine EK. 2007. Assessment of metals in bed and suspended sediments in tributaries of the Lower Athabasca River. *J Environ Sci Heal - Part A Toxic/Hazardous Subst Environ Eng*. 42(8):1021–1028. doi:10.1080/10934520701418433.
- Cooke CA, Kirk JL, Muir DCG, Wiklund JA, Wang X, Gleason A, Evans MS. 2017. Spatial and temporal patterns in trace element deposition to lakes in the Athabasca oil sands region (Alberta, Canada). *Environ Res Lett*. 12(12):26. doi:10.1088/1748-9326/aa9505.
- Culp, J.M., Brua, R.B., Luiker, E. and Glozier, N.E., 2020. Ecological causal assessment of benthic condition in the oil sands region, Athabasca River, Canada. *Science of The Total Environment*, 749, p.141393.
- Dolgova S, Popp BN, Courtoreille K, Espie RHM, Maclean B, McMaster M, Straka JR, Tetreault GR, Wilkie S, Hebert CE. 2018. Spatial trends in a biomagnifying contaminant: Application of amino acid compound-specific stable nitrogen isotope analysis to the interpretation of bird mercury levels. *Environ Toxicol Chem*. 37(5):1466-1475. doi:10.1002/etc.4113.
- Donner MW, Cuss CW, Poesch M, Sinnatamby RN, Shotyk W, Siddique T. 2018. Selenium in surface waters of the lower Athabasca River watershed: Chemical speciation and implications for aquatic life. *Environ Pollut*. 243(Pt B):1343–1351. doi:10.1016/j.envpol.2018.09.067.
- Donner MW, Javed MB, Shotyk W, Francesconi KA, Siddique T. 2017. Arsenic speciation in the lower Athabasca River watershed: A geochemical investigation of the dissolved and particulate phases. *Environ Pollut*. 224:265–274.
- Droppo IG, D'Andrea L, Krishnappan BG, Jaskot C, Trapp B, Basuvaraj M, Liss SN. 2015. Fine-sediment dynamics: towards an improved understanding of sediment erosion and transport. *J Soils Sediments*. 15(2):467–479. doi:10.1007/s11368-014-1004-3.
- Droppo IG, di Cenzo P, Parrott J, Power J. 2019. The Alberta oil sands eroded bitumen/sediment transitional journey: Influence on sediment transport dynamics, PAH signatures and toxicological effect. *Sci Total Environ*. 677:718–731. doi:10.1016/j.scitotenv.2019.04.313.
- Droppo IG, di Cenzo P, Power J, Jaskot C, Chambers PA, Alexander AC, Kirk J, Muir D. 2018. Temporal and spatial trends in riverine suspended sediment and associated polycyclic aromatic compounds (PAC) within the Athabasca oil sands region. *Sci Total Environ*. 626:1382–1393. doi:10.1016/j.scitotenv.2018.01.105.
- Dubé MG, Wilson JE. 2013. Accumulated state assessment of the Peace-Athabasca-Slave River system. *Integr Environ Assess Manag*. 9(3):405–425. doi:10.1002/ieam.1354.
- Elmes MC, Wiklund JA, Van Opstal SR, Wolfe BB, Hall RI. 2016. Characterizing baseline concentrations, proportions, and processes controlling deposition of river-transported bitumen-associated polycyclic aromatic compounds at a floodplain lake (Slave River Delta, Northwest Territories, Canada). *Environ Monit Assess*. 188(5):1–15. doi:10.1007/s10661-016-5277-4.
- Emmerton CA, Cooke CA, Wentworth GR, Graydon JA, Ryjkov A, Dastoor A. 2018. Total Mercury and Methylmercury in Lake Water of Canada's Oil Sands Region. *Environ Sci Technol*. 52(19):10946–10955. doi:10.1021/acs.est.8b01680.

- Evans MS, McMaster M, Muir DCG, Parrott J, Tetreault GR, Keating J. 2019. Forage fish and polycyclic aromatic compounds in the Fort McMurray oil sands area: Body burden comparisons with environmental distributions and consumption guidelines. *Environ Pollut.* 255(Pt 2). doi:10.1016/j.envpol.2019.113135.
- Evans MS, Talbot A. 2012. Investigations of mercury concentrations in walleye and other fish in the Athabasca River ecosystem with increasing oil sands developments. *J Environ Monit.* 14(7):1989–2003. doi:10.1039/c2em30132f.
- Gerner N V, Koné M, Ross MS, Pereira A, Ulrich AC, Martin JW, Liess M. 2017. Stream invertebrate community structure at Canadian oil sands development is linked to concentration of bitumen-derived contaminants. *Sci Total Environ.* 575:1005–1013. doi:10.1016/j.scitotenv.2016.09.169.
- Glozier, N.E., Pippy, K., Levesque L., Ritcey, A., Armstrong, B., Tobin, O., Cooke, C.A., Conly, M., Dirk, L., Epp, C., Gue, A., Hazewinkel, R., Keet, E., Lindeman, D., Maines, J., Syrgiannis, J., Su, M. & V. Tumber. 2018. Surface Water Quality of the Athabasca, Peace and Slave Rivers and Riverine Waterbodies within the Peace-Athabasca Delta. Oil Sands Monitoring Program Technical Report Series No. 1.4. 64 p.
- Guéguen C, Clarisse O, Perroud A, McDonald A. 2011. Chemical speciation and partitioning of trace metals (Cd, Co, Cu, Ni, Pb) in the lower Athabasca river and its tributaries (Alberta, Canada). *J Environ Monit.* 13(10):2865–2872. doi:10.1039/c1em10563a.
- Hall RI, Wolfe BB, Wiklund JA, Edwards TWD, Farwell AJ, Dixon DG. 2012. Has Alberta Oil Sands Development Altered Delivery of Polycyclic Aromatic Compounds to the Peace-Athabasca Delta? *PLoS One.* 7(9):9. doi:10.1371/journal.pone.0046089.
- Headley J V., Crosley B, Conly FM, Quagraine EK. 2005. The characterization and distribution of inorganic chemicals in tributary waters of the lower Athabasca river, oilsands region, Canada. *J Environ Sci Heal - Part A Toxic/Hazardous Subst Environ Eng.* 40(1):1–27. doi:10.1081/ESE-200033418.
- Jasechko S, Gibson JJ, Jean Birks S, Yi Y. 2012. Quantifying saline groundwater seepage to surface waters in the Athabasca oil sands region. *Appl Geochemistry.* 27(10):2068–2076. doi:10.1016/j.apgeochem.2012.06.007.
- Javed MB, Cuss CW, Grant-Weaver I, Shotyk W. 2017. Size-resolved Pb distribution in the Athabasca River shows snowmelt in the bituminous sands region an insignificant source of dissolved Pb. *Sci Rep.* 7(1):1–11. doi:10.1038/srep43622.
- Javed MB, Shotyk W. 2018. Estimating bioaccessibility of trace elements in particles suspended in the Athabasca River using sequential extraction. *Environ Pollut.* 240:466–474. doi:10.1016/j.envpol.2018.04.131.
- Kay ML, Wiklund JA, Remmer CR, Owca TJ, Klemt WH, Neary LK, Brown K, MacDonald E, Thomson K, Vucic JM, et al. 2020. Evaluating temporal patterns of metals concentrations in floodplain lakes of the Athabasca Delta (Canada) relative to pre-industrial baselines. *Sci Total Environ.* 704:135309. doi:10.1016/j.scitotenv.2019.135309.
- Kelly EN, Schindler DW, Hodson P V., Short JW, Radmanovich R, Nielsen CC. 2010. Oil sands development contributes elements toxic at low concentrations to the Athabasca River and its tributaries. *Proc Natl Acad Sci U S A.* 107(37):16178–16183. doi:10.1073/pnas.1008754107.
- Kelly EN, Short JW, Schindler DW, Hodson P V., Ma M, Kwan AK, Fortin BL. 2009. Oil sands development contributes polycyclic aromatic compounds to the Athabasca River and its tributaries. *Proc Natl Acad Sci U S A.* 106(52):22346–22351. doi:10.1073/pnas.0912050106.
- Klemt WH, Kay ML, Wiklund JA, Wolfe BB, Hall RI. 2020. Assessment of vanadium and nickel enrichment in Lower Athabasca River floodplain lake sediment within the Athabasca Oil Sands Region (Canada). *Environ Pollut.* 265:114920. doi:10.1016/j.envpol.2020.114920.
- Kurek J, Kirk JL, Muir DCG, Wang X, Evans MS, Smol JP. 2013. Legacy of a half century of Athabasca oil sands development recorded by lake ecosystems. *Proc Natl Acad Sci.* 110(5):1761–1766. doi:10.1073/pnas.1217675110.

- Lavoie I, Guéguen C, Fortin C. 2011. Benthic diatom communities from rivers in close proximity to the Athabasca tar sands (Alberta, Canada). *Water Qual Res J Canada*. 46(4):355–365. doi:10.2166/wqrjc.2011.019.
- McMaster M, Parrott J, Bartlett A, Gagne F, Evans M, Tetreault G, Keith H, Gee J. 2018. Aquatic Ecosystem Health Assessment of the Athabasca River Mainstem and Series Tributaries Using Fish Health and Fish and Invertebrate Toxicological Testing. *Oil Sands Monit Progr Tech Rep Ser. No. 1.8*:76 pages.
- McMaster ME, Evans MS, Alae M, Muir DCG, Hewitt LM. 2006. Northern rivers ecosystem initiative: Distribution and effects of contaminants. *Environ Monit Assess*. 113(1–3):143–165. doi:10.1007/s10661-005-9100-x.
- Ohiozebau E, Tendler B, Codling G, Kelly E, Giesy JP, Jones PD. 2017. Potential health risks posed by polycyclic aromatic hydrocarbons in muscle tissues of fishes from the Athabasca and Slave Rivers, Canada. *Environ Geochem Health*. 39(1):139–160. doi:10.1007/s10653-016-9815-3.
- Ohiozebau E, Tendler B, Hill A, Codling G, Kelly E, Giesy JP, Jones PD. 2016. Products of biotransformation of polycyclic aromatic hydrocarbons in fishes of the Athabasca/Slave river system, Canada. *Environ Geochem Health*. 38(2):577–591. doi:10.1007/s10653-015-9744-6.
- Owca TJ, Kay ML, Faber J, Remmer CR, Zabel N, Wiklund JA, Wolfe BB, Hall RI. 2020. Use of pre-industrial baselines to monitor anthropogenic enrichment of metals concentrations in recently deposited sediment of floodplain lakes in the Peace-Athabasca Delta (Alberta, Canada). *Environ Monit Assess*. 192(2):1–22. doi:10.1007/s10661-020-8067-y.
- Parrott JL, Marentette JR, Hewitt LM, McMaster ME, Gillis PL, Norwood WP, Kirk JL, Peru KM, Headley J V., Wang Z, et al. 2018. Meltwater from snow contaminated by oil sands emissions is toxic to larval fish, but not spring river water. *Sci Total Environ*. 625:264–274. doi:10.1016/j.scitotenv.2017.12.284.
- Pilote M, André C, Turcotte P, Gagné F, Gagnon C. 2018. Metal bioaccumulation and biomarkers of effects in caged mussels exposed in the Athabasca oil sands area. *Sci Total Environ*. 610–611:377–390. doi:10.1016/j.scitotenv.2017.08.023.
- Ross MS, Pereira ADS, Fennell J, Davies M, Johnson J, Sliva L, Martin JW. 2012. Quantitative and qualitative analysis of naphthenic acids in natural waters surrounding the canadian oil sands industry. *Environ Sci Technol*. 46(23):12796–12805. doi:10.1021/es303432u.
- Shotyk W, Bicalho B, Cuss CW, Donner MW, Grant-Weaver I, Haas-Neill S, Javed MB, Krachler M, Noernberg T, Pelletier R, et al. 2017. Trace metals in the dissolved fraction (< 0.45 µm) of the lower Athabasca River: Analytical challenges and environmental implications. *Sci Total Environ*. 580:660–669. doi:10.1016/j.scitotenv.2016.12.012.
- Skierszkan EK, Irvine G, Doyle JR, Kimpe LE, Blais JM. 2013. Is there widespread metal contamination from in-situ bitumen extraction at Cold Lake, Alberta heavy oil field? *Sci Total Environ*. 447:337–344. doi:10.1016/j.scitotenv.2012.12.097.
- Sun C, Shotyk W, Cuss CW, Donner MW, Fennell J, Javed M, Noernberg T, Poesch M, Pelletier R, Sinnatamby N, et al. 2017. Characterization of Naphthenic Acids and Other Dissolved Organics in Natural Water from the Athabasca Oil Sands Region, Canada. *Environ Sci Technol*. 51(17):9524–9532. doi:10.1021/acs.est.7b02082.
- Tendler B, Ohiozebau E, Codling G, Giesy JP, Jones PD. 2020. Concentrations of Metals in Fishes from the Athabasca and Slave Rivers of Northern Canada. *Environ Toxicol Chem*. 39(11):2180–2195. doi:10.1002/etc.4852.
- Tetreault GR, Bennett CJ, Clark TW, Keith H, Parrott JL, McMaster ME. 2020. Fish Performance Indicators Adjacent to Oil Sands Activity: Response in Performance Indicators of Slimy Sculpin in the Steepbank River, Alberta, Adjacent to Oil Sands Mining Activity. *Environ Toxicol Chem*. 39(2):396–409. doi:10.1002/etc.4625.
- Timoney KP, Lee P. 2009. Does the Alberta Tar Sands Industry Pollute? The Scientific Evidence. *Open Conserv Biol J*. 3(1):65–81. doi:10.2174/1874839200903010065.

- Wang Z, Yang C, Parrott JL, Frank RA, Yang Z, Brown CE, Hollebone BP, Landriault M, Fieldhouse B, Liu Y, et al. 2014. Forensic source differentiation of petrogenic, pyrogenic, and biogenic hydrocarbons in Canadian oil sands environmental samples. *J Hazard Mater.* 271:166–177. doi:10.1016/j.jhazmat.2014.02.021.
- Wiklund JA, Hall RI, Wolfe BB, Edwards TWD, Farwell AJ, Dixon DG. 2012. Has Alberta oil sands development increased far-field delivery of airborne contaminants to the Peace-Athabasca Delta? *Sci Total Environ.* 433:379–382. doi:10.1016/j.scitotenv.2012.06.074.
- Wiklund JA, Hall RI, Wolfe BB, Edwards TWD, Farwell AJ, Dixon DG. 2014. Use of pre-industrial floodplain lake sediments to establish baseline river metal concentrations downstream of Alberta oil sands: A new approach for detecting pollution of rivers. *Environ Res Lett.* 9(12):12. doi:10.1088/1748-9326/9/12/124019.
- Young RF, Michel LM, Fedorak PM. 2011. Distribution of naphthenic acids in tissues of laboratory-exposed fish and in wild fishes from near the Athabasca oil sands in Alberta, Canada. *Ecotoxicol Environ Saf.* 74(4):889–896. doi:10.1016/j.ecoenv.2010.12.009.
- Young RF, Wismer W V., Fedorak PM. 2008. Estimating naphthenic acids concentrations in laboratory-exposed fish and in fish from the wild. *Chemosphere.* 73(4):498–505. doi:10.1016/j.chemosphere.2008.06.040.

## Wildlife harvesting

---

- Arciszewski TJ, Munkittrick KR, Kilgour BW, Keith HM, Linehan JE, McMaster ME. 2017. Increased size and relative abundance of migratory fishes observed near the Athabasca oil sands. *Facets.* 2(2):833–858. doi:10.1139/facets-2017-0028.

## Response

---

### Distributions

---

- Abib TH, Chasmer L, Hopkinson C, Mahoney C, Rodriguez LCE. 2019. Seismic line impacts on proximal boreal forest and wetland environments in Alberta. *Sci Total Environ.* 658:1601–1613. doi:10.1016/j.scitotenv.2018.12.244.
- Arciszewski TJ, Munkittrick KR, Kilgour BW, Keith HM, Linehan JE, McMaster ME. 2017. Increased size and relative abundance of migratory fishes observed near the Athabasca oil sands. *Facets.* 2(2):833–858. doi:10.1139/facets-2017-0028.
- Ball J, Sólymos P, Schmiegelow F, Hache S, Schieck J, Bayne E. 2016. Regional habitat needs of a nationally listed species, Canada Warbler (*Cardellina canadensis*), in Alberta, Canada. *Avian Conservation and Ecology.* 11(2):10. doi:10.5751/ACE-00916-110210.
- Barber QE, Parisien MA, Whitman E, Stralberg D, Johnson CJ, St-Laurent MH, DeLancey ER, Price DT, Arseneault D, Wang X, et al. 2018. Potential impacts of climate change on the habitat of boreal woodland caribou. *Ecosphere.* 9(10). doi:10.1002/ecs2.2472.
- Cadieux P, Boulanger Y, Cyr D, Taylor AR, Price DT, Sólymos P, Stralberg D, Chen H, Brecka A, Tremblay JA. 2020. Projected effects of climate change on boreal bird community accentuated by anthropogenic disturbances in western boreal forest, Canada. *Divers Distrib.*:1–15. doi:10.1111/ddi.13057.
- Cameron EK, Bayne EM. 2009. Road age and its importance in earthworm invasion of northern boreal forests. *J Appl Ecol.* 46(1):28-36. doi:10.1111/j.1365-2664.2008.01535.x.

- Curtis CJ, Roger F, Neil R, Shilland J, Simpson GL, Turner S, Yang H, Pla S. 2010. Palaeolimnological assessment of lake acidification and environmental change in the Athabasca Oil Sands Region, Alberta. *J Limnol.* 69(SUPPL. 1):92–104. doi:10.3274/JL10-69-S1-10.
- Dawe CA, Filicetti AT, Nielsen SE. 2017. Effects of linear disturbances and fire severity on velvet leaf blueberry abundance, vigor, and berry production in recently burned jack pine forests. *Forests.* 8(10):398. doi:10.3390/f8100398.
- Dawe KL, Bayne EM, Boutin S. 2014. Influence of climate and human land use on the distribution of white-tailed deer (*Odocoileus virginianus*) in the western boreal forest. *Can J Zool.* 92(4):353-363. doi:10.1139/cjz-2013-0262.
- Dawe KL, Boutin S. 2016. Climate change is the primary driver of white-tailed deer (*Odocoileus virginianus*) range expansion at the northern extent of its range; land use is secondary. *Ecol Evol.* 6(18):6435-6451. doi:10.1002/ece3.2316.
- Dickie M, McNay SR, Sutherland GD, Cody M, Avgar T. 2020. Corridors or risk? Movement along, and use of, linear features varies predictably among large mammal predator and prey species. *J Anim Ecol.* 89(2):623–634. doi:10.1111/1365-2656.13130.
- Dickie M, Serrouya R, DeMars C, Cranston J, Boutin S. 2017. Evaluating functional recovery of habitat for threatened woodland caribou. *Ecosphere.* 8(9):e01936. doi:10.1002/ecs2.1936.
- Dickie M, Serrouya R, McNay RS, Boutin S. 2017. Faster and farther: wolf movement on linear features and implications for hunting behaviour. du Toit J, editor. *J Appl Ecol.* 54(1):253-263. doi:10.1111/1365-2664.12732.
- Domahidi Z, Shonfield J, Nielsen SE, Spence JR, Bayne EM. 2019. Spatial distribution of the boreal owl and northern saw-whet owl in the Boreal region of Alberta, Canada. *Avian Conserv Ecol.* 14(2). doi:10.5751/ACE-01445-140214.
- Dunne BM, Quinn MS. 2009. Effectiveness of above-ground pipeline mitigation for moose (*Alces alces*) and other large mammals. *Biol Conserv.* 142(2):332–343. doi:10.1016/j.biocon.2008.10.029.
- Fisher JT, Burton AC, Nolan L, Roy L. 2020. Influences of landscape change and winter severity on invasive ungulate persistence in the Nearctic boreal forest. *Sci Rep.* 10(1):1–11. doi:10.1038/s41598-020-65385-3.
- Fisher JT, Burton AC. 2018. Wildlife winners and losers in an oil sands landscape. *Frontiers in Ecology and the Environment.* 16(6):323-328. doi:10.1002/fee.1807.
- Foster KR, Godwin CM, Pyle P, Saracco JF. 2017. Reclamation and habitat-disturbance effects on landbird abundance and productivity indices in the oil sands region of northeastern Alberta, Canada. *Restoration Ecology.* 25(4):532-538. doi:10.1111/rec.12478.
- Hedley RW, McLeod LJ, Yip DA, Farr D, Knaga P, Drake KL, Bayne E. 2020. Modeling the occurrence of the yellow rail (*Coturnicops noveboracensis*) in the context of ongoing resource development in the oil sands region of Alberta. *Avian Conserv Ecol.* 15(1):1–14. doi:10.5751/ACE-01538-150110.
- Kurek J, Kirk JL, Muir DCG, Wang X, Evans MS, Smol JP. 2013. Legacy of a half century of Athabasca oil sands development recorded by lake ecosystems. *Proc Natl Acad Sci.* 110(5):1761–1766. doi:10.1073/pnas.1217675110.
- Latham ADM, Latham MC, Boyce MS, Boutin S. 2011. Movement responses by wolves to industrial linear features and their effect on woodland caribou in northeastern Alberta. *Ecol Appl.* 21(8):2854-2865. doi:10.1890/11-0666.1.
- Latham ADM, Latham MC, Boyce MS, Boutin S. 2013. Spatial relationships of sympatric wolves (*Canis lupus*) and coyotes (*C. latrans*) with woodland caribou (*Rangifer tarandus caribou*) during the calving season in a human-modified boreal landscape. *Wildl Res.* 40(3):250-260. doi:10.1071/WR12184.

Latham ADM, Latham MC, Boyce MS. 2011. Habitat selection and spatial relationships of black bears (*Ursus americanus*) with woodland caribou (*Rangifer tarandus caribou*) in northeastern Alberta. *Can J Zool.* 89(4):267-277. doi:10.1139/z10-115.

Latham ADM, Latham MC, Knopff KH, Hebblewhite M, Boutin S. 2013. Wolves, white-tailed deer, and beaver: Implications of seasonal prey switching for woodland caribou declines. *Ecography (Cop).* 36(12):1276–1290. doi:10.1111/j.1600-0587.2013.00035.x.

Latham ADM, Latham MC, Mccutchen NA, Boutin S. 2011. Invading white-tailed deer change wolf-caribou dynamics in northeastern Alberta. *J Wildl Manage.* 75(1):204-212. doi:10.1002/jwmg.28.

Latifovic R, Pouliot D. 2014. Monitoring cumulative long-term vegetation changes over the Athabasca Oil Sands region. *IEEE J Sel Top Appl Earth Obs Remote Sens.* 7(8):3380-3392. doi:10.1109/JSTARS.2014.2321058.

Mahon CL, Holloway GL, Bayne EM, Toms JD. 2019 May 23. Additive and interactive cumulative effects on boreal landbirds: winners and losers in a multi-stressor landscape. *Ecol Appl.*:e01895. doi:10.1002/eap.1895.

Morissette JL, Bayne EM, Kardynal KJ, Hobson KA. 2019. Regional variation in responses of wetland-associated bird communities to conversion of boreal forest to agriculture. *Avian Conserv Ecol.* 14(1). doi:10.5751/ACE-01355-140112.

Muhly T, Serrouya R, Neilson E, Li H, Boutin S. 2015. Influence of in-situ oil sands development on caribou (*Rangifer tarandus*) movement. *PLoS One.* 10(9):e0136933. doi:10.1371/journal.pone.0136933.

Neilson EW, Boutin S. 2017. Human disturbance alters the predation rate of moose in the Athabasca oil sands. *Ecosphere.* 8(8):e01913. doi:10.1002/ecs2.1913.

Riva F, Acorn JH, Nielsen SE. 2018. Narrow anthropogenic corridors direct the movement of a generalist boreal butterfly. *Biol Lett.* 14(2):20170770. doi:10.1098/rsbl.2017.0770.

Riva F, Acorn JH, Nielsen SE. 2018a. Distribution of Cranberry Blue Butterflies (*Agriades optilete*) and Their Responses to Forest Disturbance from In Situ Oil Sands and Wildfires. *Diversity.* 10(4). doi:10.3390/d10040112.

Riva F, Acorn JH, Nielsen SE. 2018b. Localized disturbances from oil sands developments increase butterfly diversity and abundance in Alberta's boreal forests. *Biological Conservation.* 217:173-180. doi:10.1016/j.biocon.2017.10.022.

Roberts D, Ciuti S, Barber QE, Willier C, Nielsen SE. 2018. Accelerated seed dispersal along linear disturbances in the Canadian oil sands region. *Scientific Reports.* 8(1):4828. doi:10.1038/s41598-018-22678-y.

Singer H V., Slattery SM, Armstrong L, Witherly S. 2020. Assessing breeding duck population trends relative to anthropogenic disturbances across the Boreal plains of Canada, 1960–2007. *Avian Conserv Ecol.* 15(1):1. doi:10.5751/ACE-01493-150101.

Stewart FEC, Nowak JJ, Micheletti T, McIntire EJB, Schmiegelow FKA, Cumming SG. 2020. Boreal Caribou Can Coexist with Natural but Not Industrial Disturbances. *J Wildl Manage.* 84(8):1435–1444. doi:10.1002/jwmg.21937.

Summers JC, Kurek J, Kirk JL, Muir DCG, Wang X, Wiklund JA, Cooke CA, Evans MS, Smol JP. 2016. Recent warming, rather than industrial emissions of bioavailable nutrients, is the dominant driver of lake primary production shifts across the Athabasca Oil Sands Region. *PLoS One.* 11(5). doi:10.1371/journal.pone.0153987.

Tattersall ER, Burgar JM, Fisher JT, Burton AC. 2020. Boreal predator co-occurrences reveal shared use of seismic lines in a working landscape. *Ecol Evol.* 10(3):1678–1691. doi:10.1002/ece3.6028.



- Tattersall ER, Burgar JM, Fisher JT, Burton AC. 2020. Mammal seismic line use varies with restoration: Applying habitat restoration to species at risk conservation in a working landscape. *Biol Conserv.* 241:108295. doi:10.1016/j.biocon.2019.108295.
- Toews M, Juanes F, Burton AC. 2017. Mammal responses to human footprint vary with spatial extent but not with spatial grain. *Ecosphere.* 8(3). doi:10.1002/ecs2.1735.
- Toews M, Juanes F, Burton AC. 2018. Mammal responses to the human footprint vary across species and stressors. *Journal of Environmental Management.* 217:690-699. doi:10.1016/j.jenvman.2018.04.009.
- Ward EM, Gorelick SM. 2018. Drying drives decline in muskrat population in the Peace-Athabasca Delta, Canada. *Environ Res Lett.* 13(12):124026. doi:10.1088/1748-9326/aaf0ec.
- Wasser SK, Keim JL, Taper ML, Lele SR. 2011. The influences of wolf predation, habitat loss, and human activity on caribou and moose in the Alberta oil sands. *Frontiers in Ecology and the Environment.* 9(10):546-551. doi:10.1890/100071.
- Wilson S, Saracco JF, Flockhart DTT, Godwin CM, Foster KR. 2018. Drivers of demographic decline across the annual cycle of a threatened migratory bird. *Scientific Reports.* 8(7316). doi:10.1038/s41598-018-25633-z.
- Wilson SJ, Bayne EM. 2018. Use of an acoustic location system to understand how presence of conspecifics and canopy cover influence ovenbird (*Seiurus aurocapilla*) space use near reclaimed wellsites in the boreal forest of Alberta. *Avian Conserv Ecol.* 13(2). doi:10.5751/ACE-01248-130204.
- Zhang J, Kissling WD, He F. 2013. Local forest structure, climate and human disturbance determine regional distribution of boreal bird species richness in Alberta, Canada. *Journal of Biogeography.* 40(6):1131-1142. doi:10.1111/jbi.12063.

## Diversity

---

- Anas MUM, Meegahage BJ, Evans MS, Jeffries DS, Wissel B. 2017. Scale-dependent effects of natural environmental gradients, industrial emissions and dispersal processes on zooplankton metacommunity structure: Implications for the bioassessment of boreal lakes. *Ecol Indic.* 82:484–494. doi:10.1016/j.ecolind.2017.07.035.
- Boutin C, Carpenter DJ. 2017. Assessment of wetland/upland vegetation communities and evaluation of soil-plant contamination by polycyclic aromatic hydrocarbons and trace metals in regions near oil sands mining in Alberta. *Sci Total Environ.* 576:829-839. doi:10.1016/j.scitotenv.2016.10.062.
- Culp, J. C., Glozier, N. E., Baird D. J., Baird, Wrona, F. J., Brua, R. B., Ritcey A. L., Peters D. L., Casey. R., Choung, C. B., Curry, C. J., Halliwell, D., Keet, E., Kilgour, B., Kirk, J., Lento, J., Luiker, E. & C. Suzanne. 2018. Assessing ecosystem health in benthic macroinvertebrate assemblages of the Athabasca river mainstem, tributaries, and Peace-Athabasca Delta. *Oil Sands Monitoring Technical Report Series No. 1.7.* 82 p.
- Culp, J.M., Brua, R.B., Luiker, E. and Glozier, N.E., 2020. Ecological causal assessment of benthic condition in the oil sands region, Athabasca River, Canada. *Science of The Total Environment*, 749, p.141393.
- Ficken CD, Cobbaert D, Rooney RC. 2019. Low extent but high impact of human land use on wetland flora across the boreal oil sands region. *Sci Total Environ.* 693:133647. doi:10.1016/j.scitotenv.2019.133647.
- Gagné F, André C, Turcotte P, Gagnon C. 2016. Comparative toxicity of selected naphthenic acids, oil sands processed water and surface waters in rainbow trout hepatocytes: A gene expression study. *SOJ Biochem.* 2(3):1–13. doi:10.15226/2376-4589/2/3/00116.

- Gerner N V, Koné M, Ross MS, Pereira A, Ulrich AC, Martin JW, Liess M. 2017. Stream invertebrate community structure at Canadian oil sands development is linked to concentration of bitumen-derived contaminants. *Sci Total Environ.* 575:1005–1013. doi:10.1016/j.scitotenv.2016.09.169.
- Laird KR, Mushet GR, Flower RJ, Wolfe AP, Cumming BF. 2020. Heterogeneous response of diatom assemblages since ca. 1945 in lakes from boreal regions of northern Alberta and Saskatchewan, Canada. *J Paleolimnol.* 64(2):137–153. doi:10.1007/s10933-020-00128-y.
- Libera N, Summers JC, Rühland KM, Kurek J, Smol JP. 2020. Diatom assemblage changes in shallow lakes of the Athabasca Oil Sands Region are not tracking aerially deposited contaminants. *J Paleolimnol.* 64(3):257–272. doi:10.1007/s10933-020-00136-y.
- Mahon CL, Holloway G, Sólymos P, Cumming SG, Bayne EM, Schmiegelow FKA, Song SJ. 2016. Community structure and niche characteristics of upland and lowland western boreal birds at multiple spatial scales. *Forest Ecology and Management.* 361:99-116. doi:10.1016/j.foreco.2015.11.007.
- Mao L, Dennett J, Bater CW, Tompalski P, Coops NC, Farr D, Kohler M, White B, Stadt JJ, Nielsen SE. 2018. Using airborne laser scanning to predict plant species richness and assess conservation threats in the oil sands region of Alberta's boreal forest. *For Ecol Manage.* 409:29–37. doi:10.1016/j.foreco.2017.11.017.
- Mayor SJ, Boutin S, He F, Cahill JF. 2015. Limited impacts of extensive human land use on dominance, specialization, and biotic homogenization in boreal plant communities. *BMC Ecology.* 15(1):5. doi:10.1186/s12898-015-0037-9.
- Mayor SJ, Cahill JF, He F, Sólymos P, Boutin S. 2012. Regional boreal biodiversity peaks at intermediate human disturbance. *Nat Commun.* 3:1142. doi:10.1038/ncomms2145.
- McMaster ME, Evans MS, Alaei M, Muir DCG, Hewitt LM. 2006. Northern rivers ecosystem initiative: Distribution and effects of contaminants. *Environ Monit Assess.* 113(1–3):143–165. doi:10.1007/s10661-005-9100-x.
- Mushet GR, Laird KR, Das B, Hesjedal B, Leavitt PR, Scott KA, Simpson GL, Wissel B, Wolfe JD, Cumming BF. 2017. Regional climate changes drive increased scaled-chrysohyte abundance in lakes downwind of Athabasca Oil Sands nitrogen emissions. *J Paleolimnol.* 58(3):419–435. doi:10.1007/s10933-017-9987-6.
- Nielsen SE, Dennett JM, Bater CW. 2020. Landscape patterns of rare vascular plants in the lower athabasca region of alberta, Canada. *Forests.* 11(6):699. doi:10.3390/f11060699.
- Owca TJ, Kay ML, Faber J, Remmer CR, Zabel N, Wiklund JA, Wolfe BB, Hall RI. 2020. Use of pre-industrial baselines to monitor anthropogenic enrichment of metals concentrations in recently deposited sediment of floodplain lakes in the Peace-Athabasca Delta (Alberta, Canada). *Environ Monit Assess.* 192(2):1–22. doi:10.1007/s10661-020-8067-y.
- Parsons BG, Watmough SA, Dillon PJ, Somers KM. 2010. A bioassessment of lakes in the Athabasca Oil Sands Region, Alberta, using benthic macroinvertebrates. *J Limnol.* 69(Suppl. 1):105–117. doi:10.3274/JL10-69-S1-11.
- Riva F, Acorn JH, Nielsen SE. 2018b. Localized disturbances from oil sands developments increase butterfly diversity and abundance in Alberta's boreal forests. *Biological Conservation.* 217:173-180. doi:10.1016/j.biocon.2017.10.022.
- Riva F, Pinzon J, Acorn JH, Nielsen SE. 2020. Composite Effects of Cutlines and Wildfire Result in Fire Refuges for Plants and Butterflies in Boreal Treed Peatlands. *Ecosystems.* 23(3):485–497. doi:10.1007/s10021-019-00417-2.
- Schwalb AN, Alexander AC, Paul AJ, Cottenie K, Rasmussen JB. 2015. Changes in migratory fish communities and their health, hydrology, and water chemistry in rivers of the Athabasca oil sands region: A review of historical and current data. *Environ Rev.* 23(2):133–150. doi:10.1139/er-2014-0065.

Summers JC, Kurek J, Rühland KM, Neville EE, Smol JP. 2017. Assessment of multi-trophic changes in a shallow boreal lake simultaneously exposed to climate change and aerial deposition of contaminants from the Athabasca Oil Sands Region, Canada. *Sci Total Environ.* 592:573–583. doi:10.1016/j.scitotenv.2017.03.079.

Watmough SA, Bird A, McDonough A, Grimm E. 2019. Forest Fertilization Associated with Oil Sands Emissions. *Ecosystems.* 22(1):1–14. doi:10.1007/s10021-018-0249-x.

Wieder RK, Vitt DH, Vile MA, Graham JA, Hartsock JA, Fillingim H, House M, Quinn JC, Scott KD, Petix M, et al. 2019. Experimental nitrogen addition alters structure and function of a boreal bog: critical load and thresholds revealed. *Ecol Monogr.* 89(3):e01371. doi:10.1002/ecm.1371.

Zhang J, Mayor SJ, He F. 2014. Does disturbance regime change community assembly of angiosperm plant communities in the boreal forest? *J Plant Ecol.* 7(2):188–201. doi:10.1093/jpe/rtt068.

## Health

---

Arciszewski TJ, Munkittrick KR, Kilgour BW, Keith HM, Linehan JE, McMaster ME. 2017. Increased size and relative abundance of migratory fishes observed near the Athabasca oil sands. *Facets.* 2(2):833–858. doi:10.1139/facets-2017-0028.

Arens CJ, Arens JC, Hogan NS, Kavanagh RJ, Berrue F, Van Der Kraak GJ, van den Heuvel MR. 2017. Population impacts in white sucker (*Catostomus commersonii*) exposed to oil sands–derived contaminants in the Athabasca River. *Environ Toxicol Chem.* 36(8):2058–2067. doi:10.1002/etc.3735.

Bartels SF, Gendreau-Berthiaume B, Macdonald SE. 2019. The impact of atmospheric acid deposition on tree growth and forest understory vegetation in the Athabasca Oil Sands Region. *Sci Total Environ.* 696:133877. doi:10.1016/j.scitotenv.2019.133877.

Berger RG, Aslund MW, Sanders G, Charlebois M, Knopper LD, Bresee KE. 2016. A multiple lines of evidence approach for the ecological risk assessment of an accidental bitumen release from a steam assisted gravity drainage (SAGD) well in the Athabasca oil sands region. *Sci Total Environ.* 542:495–504. doi:10.1016/j.scitotenv.2015.10.050.

Blonar CA, Hewitt M, McMaster M, Kirk J, Wang Z, Norwood W, Marcogliese DJ. 2016. Parasite community similarity in Athabasca River trout-perch (*Percopsis omiscomaycus*) varies with local-scale land use and sediment hydrocarbons, but not distance or linear gradients. *Parasitol Res.* 115(10):3853–3866. doi:10.1007/s00436-016-5151-x.

Cash KJ, Gibbons WN, Munkittrick KR, Brown SB, Carey J. 2000. Fish health in the peace, Athabasca and slave river systems. *J Aquat Ecosyst Stress Recover.* 8(1):77–86. doi:10.1023/A:1011495823504.

Cruz-Martinez L, Fernie KJ, Soos C, Harner T, Getachew F, Smits JEG. 2015. Detoxification, endocrine, and immune responses of tree swallow nestlings naturally exposed to air contaminants from the Alberta oil sands. *Sci Total Environ.* 502:8–15. doi:10.1016/j.scitotenv.2014.09.008.

Dawe CA, Filicetti AT, Nielsen SE. 2017. Effects of linear disturbances and fire severity on velvet leaf blueberry abundance, vigor, and berry production in recently burned jack pine forests. *Forests.* 8(10):398. doi:10.3390/f8100398.

Evans MS, Talbot A. 2012. Investigations of mercury concentrations in walleye and other fish in the Athabasca River ecosystem with increasing oil sands developments. *J Environ Monit.* 14(7):1989–2003. doi:10.1039/c2em30132f.

- Fernie KJ, Marteinson SC, Chen D, Palace V, Peters L, Soos C, Smits JEG. 2019. Changes in thyroid function of nestling tree swallows (*Tachycineta bicolor*) in relation to polycyclic aromatic compounds and other environmental stressors in the Athabasca Oil Sands Region. *Environ Res.* 169(November 2018):464–475. doi:10.1016/j.envres.2018.11.031.
- Fernie KJ, Marteinson SC, Soos C, Chen D, Cruz-Martinez L, Smits JEG. 2018. Reproductive and developmental changes in tree swallows (*Tachycineta bicolor*) are influenced by multiple stressors, including polycyclic aromatic compounds, in the Athabasca Oil Sands. *Environ Pollut.* 238:931-941. doi:10.1016/j.envpol.2018.03.074.
- Foster KR, Godwin CM, Pyle P, Saracco JF. 2017. Reclamation and habitat-disturbance effects on landbird abundance and productivity indices in the oil sands region of northeastern Alberta, Canada. *Restoration Ecology.* 25(4):532-538. doi:10.1111/rec.12478.
- Godwin CM, Barclay RMR, Smits JEG. 2019. Tree Swallow (*Tachycineta bicolor*) nest success and nestling growth near oil sands mining operations in northeastern Alberta, Canada. *Can J Zool.* 97(6):547-557. doi:10.1139/cjz-2018-0247.
- McMaster M, Parrott J, Bartlett A, Gagne F, Evans M, Tetreault G, Keith H, Gee J. 2018. Aquatic Ecosystem Health Assessment of the Athabasca River Mainstem and Series Tributaries Using Fish Health and Fish and Invertebrate Toxicological Testing. *Oil Sands Monit Progr Tech Rep Ser. No. 1.8*:76 pages.
- Ohiozebau E, Tendler B, Codling G, Kelly E, Giesy JP, Jones PD. 2017. Potential health risks posed by polycyclic aromatic hydrocarbons in muscle tissues of fishes from the Athabasca and Slave Rivers, Canada. *Environ Geochem Health.* 39(1):139–160. doi:10.1007/s10653-016-9815-3.
- Ohiozebau E, Tendler B, Hill A, Codling G, Kelly E, Giesy JP, Jones PD. 2016. Products of biotransformation of polycyclic aromatic hydrocarbons in fishes of the Athabasca/Slave river system, Canada. *Environ Geochem Health.* 38(2):577–591. doi:10.1007/s10653-015-9744-6.
- Parrott JL, Marentette JR, Hewitt LM, McMaster ME, Gillis PL, Norwood WP, Kirk JL, Peru KM, Headley J V., Wang Z, et al. 2018. Meltwater from snow contaminated by oil sands emissions is toxic to larval fish, but not spring river water. *Sci Total Environ.* 625:264–274. doi:10.1016/j.scitotenv.2017.12.284.
- Pilote M, André C, Turcotte P, Gagné F, Gagnon C. 2018. Metal bioaccumulation and biomarkers of effects in caged mussels exposed in the Athabasca oil sands area. *Sci Total Environ.* 610–611:377–390. doi:10.1016/j.scitotenv.2017.08.023.
- Raine JC, Pietrock M, Willner K, Chung K, Turcotte D, Parrott JL. 2017. Parasitological Analysis and Gill Histopathology of Pearl Dace (*Semotilus Margarita*) and Brook Stickleback (*Culaea Inconstans*) Collected from the Athabasca Oil Sands Area (Canada). *Bull Environ Contam Toxicol.* 98(6):733–739. doi:10.1007/s00128-017-2078-6.
- Savard MM, Bégin C, Marion J. 2014. Modelling carbon isotopes in spruce trees reproduces air quality changes due to oil sands operations. *Ecological Indicators.* 45:1-8. doi:10.1016/j.ecolind.2014.03.005.
- Shotyk W, Bicalho B, Cuss CW, Grant-Weaver I, Nagel A, Noernberg T, Poesch M, Sinnatamby NR. 2019. Bioaccumulation of Tl in otoliths of Trout-perch (*Percopsis omiscomaycus*) from the Athabasca River, upstream and downstream of bitumen mining and upgrading. *Sci Total Environ.* 650:2559–2566. doi:10.1016/j.scitotenv.2018.09.318.
- Simmons DBD, Sherry JP. 2016. Plasma proteome profiles of White Sucker (*Catostomus commersonii*) from the Athabasca River within the oil sands deposit. *Comp Biochem Physiol - Part D Genomics Proteomics.* 19:181–189. doi:10.1016/j.cbd.2016.03.003.
- Tendler B, Ohiozebau E, Codling G, Giesy JP, Jones PD. 2020. Concentrations of Metals in Fishes from the Athabasca and Slave Rivers of Northern Canada. *Environ Toxicol Chem.* 39(11):2180–2195. doi:10.1002/etc.4852.
- Tetreault GR, Bennett CJ, Clark TW, Keith H, Parrott JL, McMaster ME. 2020. Fish Performance Indicators Adjacent to Oil Sands Activity: Response in Performance Indicators of Slimy Sculpin in the Steepbank River, Alberta, Adjacent to Oil Sands Mining Activity. *Environ Toxicol Chem.* 39(2):396–409. doi:10.1002/etc.4625.

- Tetreault GR, McMaster ME, Dixon DG, Parrott JL. 2003. Using reproductive endpoints in small forage fish species to evaluate the effects of Athabasca Oil Sands activities. *Environ Toxicol Chem.* 22(11):2775–2782. doi:10.1897/03-7.
- Thomas PJ, Newell EE, Eccles K, Holloway AC, Idowu I, Xia Z, Hassan E, Tomy G, Quenneville C. 2021. Co-exposures to trace elements and polycyclic aromatic compounds (PACs) impacts North American river otter (*Lontra canadensis*) baculum. *Chemosphere.* 265:128920. doi:10.1016/j.chemosphere.2020.128920.
- Timoney KP, Lee P. 2009. Does the Alberta Tar Sands Industry Pollute? The Scientific Evidence. *Open Conserv Biol J.* 3(1):65–81. doi:10.2174/1874839200903010065.
- Wasser SK, Keim JL, Taper ML, Lele SR. 2011. The influences of wolf predation, habitat loss, and human activity on caribou and moose in the Alberta oil sands. *Frontiers in Ecology and the Environment.* 9(10):546-551. doi:10.1890/100071.
- Watmough SA, Bird A, McDonough A, Grimm E. 2019. Forest Fertilization Associated with Oil Sands Emissions. *Ecosystems.* 22(1):1–14. doi:10.1007/s10021-018-0249-x.
- Wieder RK, Vile MA, Albright CM, Scott KD, Vitt DH, Quinn JC, Burke-Scoll M. 2016. Effects of altered atmospheric nutrient deposition from Alberta oil sands development on *Sphagnum fuscum* growth and C, N and S accumulation in peat. *Biogeochemistry.* 129(1–2):1–19. doi:10.1007/s10533-016-0216-6.

## Odours

---

- Adamache, Lori, Spink, David. 2012. Cumulative Effects: Concerns of Fort McKay regarding the impacts of emissions to air from industrial development. Prepared for the Fort McKay Sustainability Department. September 2012.
- Candler, C., Olson, R., DeRoy, S., Athabasca Chipewyan First Nation and Mikisew Cree Nation. 2010. As long as the rivers flow: Athabasca River knowledge, use and change. Edmonton, Alberta: Park Institute.
- Dann, Tom. 2013. Integration of odour data for the Human Exposure Monitoring Program (HEMP). Prepared for the Wood Buffalo Environmental Association.
- O'Brien RJ, Percy KE, Legge AH. 2012. Co-measurement of Volatile Organic and Sulfur Compounds in the Athabasca Oil Sands Region by Dual Detector Pneumatic Focusing Gas Chromatography. *Developments in Environmental Science* 11: 113-144. doi.org/10.1016/B978-0-08-097760-7.00006-8
- Percy KE. 2013. Ambient air quality and linkage to ecosystems in the Athabasca oil sands, Alberta. *Geosci Can* 40(11): 182–201. doi.org/10.12789/geocanj.2013.40.014
- Wood Buffalo Environmental Association (WEBA) 2014. Community odour monitoring project. Annual Report 2013-2014. No: 1410\_20898\_01\_03. [Accessed 2019 May 22]. Available from: <https://wbea.org/resources/reports-publications/>

## Valued component

### Ecosystem structure and function

- Anas MU, Scott KA, Cooper RN, Wissel B. 2014. Zooplankton communities are good indicators of potential impacts of athabasca oil sands operations on downwind boreal lakes. *Can J Fish Aquat Sci.* 71(5):719–732. doi:10.1139/cjfas-2013-0472.
- Anas MUM, Meegahage BJ, Evans MS, Jeffries DS, Wissel B. 2017. Scale-dependent effects of natural environmental gradients, industrial emissions and dispersal processes on zooplankton metacommunity structure: Implications for the bioassessment of boreal lakes. *Ecol Indic.* 82:484–494. doi:10.1016/j.ecolind.2017.07.035.
- Arciszewski TJ, Munkittrick KR, Kilgour BW, Keith HM, Linehan JE, McMaster ME. 2017. Increased size and relative abundance of migratory fishes observed near the Athabasca oil sands. *Facets.* 2(2):833–858. doi:10.1139/facets-2017-0028.
- Arens CJ, Arens JC, Hogan NS, Kavanagh RJ, Berrue F, Van Der Kraak GJ, van den Heuvel MR. 2017. Population impacts in white sucker (*Catostomus commersonii*) exposed to oil sands–derived contaminants in the Athabasca River. *Environ Toxicol Chem.* 36(8):2058–2067. doi:10.1002/etc.3735.
- Blanar CA, Hewitt M, McMaster M, Kirk J, Wang Z, Norwood W, Marcogliese DJ. 2016. Parasite community similarity in Athabasca River trout-perch (*Percopsis omiscomaycus*) varies with local-scale land use and sediment hydrocarbons, but not distance or linear gradients. *Parasitol Res.* 115(10):3853–3866. doi:10.1007/s00436-016-5151-x.
- Boutin C, Carpenter DJ. 2017. Assessment of wetland/upland vegetation communities and evaluation of soil-plant contamination by polycyclic aromatic hydrocarbons and trace metals in regions near oil sands mining in Alberta. *Sci Total Environ.* 576:829–839. doi:10.1016/j.scitotenv.2016.10.062.
- Brunet ND, Jardine TD, Jones PD, Macdermid F, Reed G, Bogdan AM, Tchir DR, Natcher DC. 2020. Towards indigenous community-led monitoring of fish in the oil sands region of Canada: Lessons at the intersection of cultural consensus and fish science. *Extr Ind Soc.* 7(4):1319–1329. doi:10.1016/j.exis.2020.06.014.
- Brunet, Nicolas D., Jardine, Timothy D., Jones, Paul D., Macdermid, Findlay, Reed, Graeme, Bogdan, Ana-Maria, Tchir, Devan R., Natcher, David C. 2020. Towards Indigenous community-led monitoring of fish in the oil sands region of Canada: Lessons at the intersection of cultural consensus and fish science. *The Extractive Industries and Society.* <https://doi.org/10.1016/j.exis.2020.06.014>
- Candler, Craig, Gibson, Ginger, Mikisew Cree First Nation. 2015. Wîyôw'tam'kitaskino (Our Land is Rich): A Mikisew Cree culture & rights assessment for the proposed Teck Frontier project update. Prepared for Mikisew Cree First Nation.
- Cash KJ, Gibbons WN, Munkittrick KR, Brown SB, Carey J. 2000. Fish health in the peace, Athabasca and slave river systems. *J Aquat Ecosyst Stress Recover.* 8(1):77–86. doi:10.1023/A:1011495823504.
- Culp, J. C., Glozier, N. E., Baird D. J., Baird, Wrona, F. J., Brua, R. B., Ritcey A. L., Peters D. L., Casey. R., Choung, C. B., Curry, C. J., Halliwell, D., Keet, E., Kilgour, B., Kirk, J., Lento, J., Luiker, E. & C. Suzanne. 2018. Assessing ecosystem health in benthic macroinvertebrate assemblages of the Athabasca river mainstem, tributaries, and Peace-Athabasca Delta. *Oil Sands Monitoring Technical Report Series No. 1.7.* 82 p.
- Culp, J.M., Brua, R.B., Luiker, E. and Glozier, N.E., 2020. Ecological causal assessment of benthic condition in the oil sands region, Athabasca River, Canada. *Science of The Total Environment*, 749, p.141393.

- Curtis CJ, Roger F, Neil R, Shilland J, Simpson GL, Turner S, Yang H, Pla S. 2010. Palaeolimnological assessment of lake acidification and environmental change in the Athabasca Oil Sands Region, Alberta. *J Limnol.* 69(SUPPL. 1):92–104. doi:10.3274/JL10-69-S1-10.
- Donner MW, Cuss CW, Poesch M, Sinnatamby RN, Shotyk W, Siddique T. 2018. Selenium in surface waters of the lower Athabasca River watershed: Chemical speciation and implications for aquatic life. *Environ Pollut.* 243(Pt B):1343–1351. doi:10.1016/j.envpol.2018.09.067.
- Evans MS, McMaster M, Muir DCG, Parrott J, Tetreault GR, Keating J. 2019. Forage fish and polycyclic aromatic compounds in the Fort McMurray oil sands area: Body burden comparisons with environmental distributions and consumption guidelines. *Environ Pollut.* 255(Pt 2). doi:10.1016/j.envpol.2019.113135.
- Evans MS, Talbot A. 2012. Investigations of mercury concentrations in walleye and other fish in the Athabasca River ecosystem with increasing oil sands developments. *J Environ Monit.* 14(7):1989–2003. doi:10.1039/c2em30132f.
- Ficken CD, Cobbaert D, Rooney RC. 2019. Low extent but high impact of human land use on wetland flora across the boreal oil sands region. *Sci Total Environ.* 693:133647. doi:10.1016/j.scitotenv.2019.133647.
- Gagné F, André C, Turcotte P, Gagnon C. 2016. Comparative toxicity of selected naphthenic acids, oil sands processed water and surface waters in rainbow trout hepatocytes: A gene expression study. *SOJ Biochem.* 2(3):1–13. doi:10.15226/2376-4589/2/3/00116.
- Gerner N V, Koné M, Ross MS, Pereira A, Ulrich AC, Martin JW, Liess M. 2017. Stream invertebrate community structure at Canadian oil sands development is linked to concentration of bitumen-derived contaminants. *Sci Total Environ.* 575:1005–1013. doi:10.1016/j.scitotenv.2016.09.169.
- Golzadeh N, Barst BD, Basu N, Baker JM, Auger JC, McKinney MA. 2020. Evaluating the concentrations of total mercury, methylmercury, selenium, and selenium:mercury molar ratios in traditional foods of the Bigstone Cree in Alberta, Canada. *Chemosphere.* 250:126285. doi:10.1016/j.chemosphere.2020.126285.
- Independent Environmental Consultants (IEC). 2018. Milestone 2: Draft Report. Strategic Environmental Assessment of Wood Buffalo National Park World Heritage Site.
- Kurek J, Kirk JL, Muir DCG, Wang X, Evans MS, Smol JP. 2013. Legacy of a half century of Athabasca oil sands development recorded by lake ecosystems. *Proc Natl Acad Sci.* 110(5):1761–1766. doi:10.1073/pnas.1217675110.
- Laird KR, Das B, Hesjedal B, Leavitt PR, Mushet GR, Scott KA, Simpson GL, Wissel B, Wolfe J, Cumming BF. 2017. Paleolimnological assessment of nutrient enrichment on diatom assemblages in a priori defined nitrogen- and phosphorus-limited lakes downwind of the Athabasca Oil Sands, Canada. *J Limnol.* 76(3):488–502. doi:10.4081/jlimnol.2017.1598.
- Laird KR, Das B, Kingsbury M, Moos MT, Pla-Rabes S, Ahad JME, Wiltse B, Cumming BF. 2013. Paleolimnological assessment of limnological change in 10 lakes from northwest Saskatchewan downwind of the Athabasca oils sands based on analysis of siliceous algae and trace metals in sediment cores. *Hydrobiologia.* 720(1):55–73. doi:10.1007/s10750-013-1623-5.
- Laird KR, Mushet GR, Flower RJ, Wolfe AP, Cumming BF. 2020. Heterogeneous response of diatom assemblages since ca. 1945 in lakes from boreal regions of northern Alberta and Saskatchewan, Canada. *J Paleolimnol.* 64(2):137–153. doi:10.1007/s10933-020-00128-y.
- Libera N, Summers JC, Rühland KM, Kurek J, Smol JP. 2020. Diatom assemblage changes in shallow lakes of the Athabasca Oil Sands Region are not tracking aerially deposited contaminants. *J Paleolimnol.* 64(3):257–272. doi:10.1007/s10933-020-00136-y.
- McMaster M, Parrott J, Bartlett A, Gagne F, Evans M, Tetreault G, Keith H, Gee J. 2018. Aquatic Ecosystem Health Assessment of the Athabasca River Mainstem and Series Tributaries Using Fish Health and Fish and Invertebrate Toxicological Testing. *Oil Sands Monit Progr Tech Rep Ser.* No. 1.8:76 pages.

- McMaster ME, Evans MS, Alaei M, Muir DCG, Hewitt LM. 2006. Northern rivers ecosystem initiative: Distribution and effects of contaminants. *Environ Monit Assess.* 113(1–3):143–165. doi:10.1007/s10661-005-9100-x.
- Mundy L.J., Bilodeau J.C., Schock D.M., Thomas P.J., Blais J.M., Pauli B.D. 2019. Using wood frog (*Lithobates sylvaticus*) tadpoles and semipermeable membrane devices to monitor polycyclic aromatic compounds in boreal wetlands in the oil sands region of northern Alberta, Canada. *Chemosphere.* 214:148-157. doi:10.1016/j.chemosphere.2018.09.034.
- Mushet GR, Laird KR, Das B, Hesjedal B, Leavitt PR, Scott KA, Simpson GL, Wissel B, Wolfe JD, Cumming BF. 2017. Regional climate changes drive increased scaled-chrysophyte abundance in lakes downwind of Athabasca Oil Sands nitrogen emissions. *J Paleolimnol.* 58(3):419–435. doi:10.1007/s10933-017-9987-6.
- Neville LA, Patterson RT, Gammon P, Macumber AL. 2014. Relationship between ecological indicators (Arcellacea), total mercury concentrations and grain size in lakes within the Athabasca oil sands region, Alberta. *Environ Earth Sci.* 72(2):577–588. doi:10.1007/s12665-013-2979-6.
- Ohiozebau E, Tendler B, Codling G, Kelly E, Giesy JP, Jones PD. 2017. Potential health risks posed by polycyclic aromatic hydrocarbons in muscle tissues of fishes from the Athabasca and Slave Rivers, Canada. *Environ Geochem Health.* 39(1):139–160. doi:10.1007/s10653-016-9815-3.
- Ohiozebau E, Tendler B, Hill A, Codling G, Kelly E, Giesy JP, Jones PD. 2016. Products of biotransformation of polycyclic aromatic hydrocarbons in fishes of the Athabasca/Slave river system, Canada. *Environ Geochem Health.* 38(2):577–591. doi:10.1007/s10653-015-9744-6.
- Owca TJ, Kay ML, Faber J, Remmer CR, Zabel N, Wiklund JA, Wolfe BB, Hall RI. 2020. Use of pre-industrial baselines to monitor anthropogenic enrichment of metals concentrations in recently deposited sediment of floodplain lakes in the Peace-Athabasca Delta (Alberta, Canada). *Environ Monit Assess.* 192(2):1–22. doi:10.1007/s10661-020-8067-y.
- Parlee, B., Geertsema, K. & Willier, A. 2012. Social-Ecological Thresholds in a Changing Boreal Landscape: Insights from Cree Knowledge of the Lesser Slave Lake Region of Alberta, Canada. *Ecology & Society* 17(2):20.
- Parrott JL, Marentette JR, Hewitt LM, McMaster ME, Gillis PL, Norwood WP, Kirk JL, Peru KM, Headley J V., Wang Z, et al. 2018. Meltwater from snow contaminated by oil sands emissions is toxic to larval fish, but not spring river water. *Sci Total Environ.* 625:264–274. doi:10.1016/j.scitotenv.2017.12.284.
- Parsons BG, Watmough SA, Dillon PJ, Somers KM. 2010. A bioassessment of lakes in the Athabasca Oil Sands Region, Alberta, using benthic macroinvertebrates. *J Limnol.* 69(Suppl. 1):105–117. doi:10.3274/JL10-69-S1-11.
- Parsons BG, Watmough SA, Dillon PJ, Somers KM. 2010. Relationships between lake water chemistry and benthic macroinvertebrates in the Athabasca Oil Sands Region, Alberta. *J Limnol.* 69(Suppl. 1):118–125. doi:10.3274/JL10-69-S1-12.
- Pilote M, André C, Turcotte P, Gagné F, Gagnon C. 2018. Metal bioaccumulation and biomarkers of effects in caged mussels exposed in the Athabasca oil sands area. *Sci Total Environ.* 610–611:377–390. doi:10.1016/j.scitotenv.2017.08.023.
- Raine JC, Pietrock M, Willner K, Chung K, Turcotte D, Parrott JL. 2017. Parasitological Analysis and Gill Histopathology of Pearl Dace (*Semotilus Margarita*) and Brook Stickleback (*Culaea Inconstans*) Collected from the Athabasca Oil Sands Area (Canada). *Bull Environ Contam Toxicol.* 98(6):733–739. doi:10.1007/s00128-017-2078-6.
- Schwalb AN, Alexander AC, Paul AJ, Cottenie K, Rasmussen JB. 2015. Changes in migratory fish communities and their health, hydrology, and water chemistry in rivers of the Athabasca oil sands region: A review of historical and current data. *Environ Rev.* 23(2):133–150. doi:10.1139/er-2014-0065.
- Shotyk W, Appleby PG, Bicalho B, Davies L, Froese D, Grant-Weaver I, Krachler M, Magnan G, Mullan-Boudreau G, Noernberg T, et al. 2016. Peat bogs in northern Alberta, Canada reveal decades of declining atmospheric Pb contamination. *Geophys Res Lett.* 43(18):9964–9974. doi:10.1002/2016GL070952.



- Shotyk W, Bicalho B, Cuss CW, Grant-Weaver I, Nagel A, Noernberg T, Poesch M, Sinnatamby NR. 2019. Bioaccumulation of Tl in otoliths of Trout-perch (*Percopsis omiscomaycus*) from the Athabasca River, upstream and downstream of bitumen mining and upgrading. *Sci Total Environ.* 650:2559–2566. doi:10.1016/j.scitotenv.2018.09.318.
- Simmons DBD, Sherry JP. 2016. Plasma proteome profiles of White Sucker (*Catostomus commersonii*) from the Athabasca River within the oil sands deposit. *Comp Biochem Physiol - Part D Genomics Proteomics.* 19:181–189. doi:10.1016/j.cbd.2016.03.003.
- Sinnatamby RN, Loewen TN, Luo Y, Pearson DG, Bicalho B, Grant-Weaver I, Cuss CW, Poesch M, Shotyk W. 2019. Spatial assessment of major and trace element concentrations from Lower Athabasca Region Trout-perch (*Percopsis omiscomaycus*) otoliths. *Sci Total Environ.* 655:363–373. doi:10.1016/j.scitotenv.2018.11.168.
- Straka, Jason R., Gray, Queenie Z. 2018 “We used to say rats fell from the sky after a flood”: Temporary recovery of muskrat following ice-jams in the Peace-Athabasca Delta. *Arctic.* (71):2: 218-228.
- Summers JC, Kurek J, Kirk JL, Muir DCG, Wang X, Wiklund JA, Cooke CA, Evans MS, Smol JP. 2016. Recent warming, rather than industrial emissions of bioavailable nutrients, is the dominant driver of lake primary production shifts across the Athabasca Oil Sands Region. *PLoS One.* 11(5). doi:10.1371/journal.pone.0153987.
- Summers JC, Kurek J, Rühland KM, Neville EE, Smol JP. 2017. Assessment of multi-trophic changes in a shallow boreal lake simultaneously exposed to climate change and aerial deposition of contaminants from the Athabasca Oil Sands Region, Canada. *Sci Total Environ.* 592:573–583. doi:10.1016/j.scitotenv.2017.03.079.
- Tendler B, Ohiozebau E, Codling G, Giesy JP, Jones PD. 2020. Concentrations of Metals in Fishes from the Athabasca and Slave Rivers of Northern Canada. *Environ Toxicol Chem.* 39(11):2180–2195. doi:10.1002/etc.4852.
- Tetreault GR, Bennett CJ, Clark TW, Keith H, Parrott JL, McMaster ME. 2020. Fish Performance Indicators Adjacent to Oil Sands Activity: Response in Performance Indicators of Slimy Sculpin in the Steepbank River, Alberta, Adjacent to Oil Sands Mining Activity. *Environ Toxicol Chem.* 39(2):396–409. doi:10.1002/etc.4625.
- Tetreault GR, McMaster ME, Dixon DG, Parrott JL. 2003. Using reproductive endpoints in small forage fish species to evaluate the effects of Athabasca Oil Sands activities. *Environ Toxicol Chem.* 22(11):2775–2782. doi:10.1897/03-7.
- Timoney KP, Lee P. 2009. Does the Alberta Tar Sands Industry Pollute? The Scientific Evidence. *Open Conserv Biol J.* 3(1):65–81. doi:10.2174/1874839200903010065.
- UNESCO (United Nations Educational, Scientific and Cultural Organization). 2017. World Heritage Centre. International Union for Conservation. Mission Report. Reactive Monitoring Mission to Wood Buffalo National Park, Canada [Mission Report].
- Wayland M, Headley J V., Peru KM, Crosley R, Brownlee BG. 2008. Levels of polycyclic aromatic hydrocarbons and dibenzothiophenes in wetland sediments and aquatic insects in the oil sands area of Northeastern Alberta, Canada. In: *Environmental Monitoring and Assessment.* Vol. 136. Environ Monit Assess. p. 167–182.
- Wieder RK, Vile MA, Albright CM, Scott KD, Vitt DH, Quinn JC, Burke-Scoll M. 2016. Effects of altered atmospheric nutrient deposition from Alberta oil sands development on Sphagnum fuscum growth and C, N and S accumulation in peat. *Biogeochemistry.* 129(1–2):1–19. doi:10.1007/s10533-016-0216-6.
- Wieder RK, Vitt DH, Burke-Scoll M, Scott KD, House M, Vile MA. 2010. Nitrogen and sulphur deposition and the growth of Sphagnum fuscum in bogs of the Athabasca Oil Sands Region, Alberta. *J Limnol.* 69(SUPPL. 1):161–170. doi:10.3274/JL10-69-S1-16.
- Wieder RK, Vitt DH, Vile MA, Graham JA, Hartsock JA, Fillingim H, House M, Quinn JC, Scott KD, Petix M, et al. 2019. Experimental nitrogen addition alters structure and function of a boreal bog: critical load and thresholds revealed. *Ecol Monogr.* 89(3):e01371. doi:10.1002/ecm.1371.
- Xia Z, Idowu I, Marvin C, Thomas PJ, Johnson W, Francisco O, Stetefeld J, Crimmins B, Fry M, Tomy GT. 2019. Identification of halogenated polycyclic aromatic hydrocarbons in biological samples from Alberta Oil-Sands Region. *Chemosphere.* 215:206–213. doi:10.1016/j.chemosphere.2018.10.050.

Young RF, Wismer W V., Fedorak PM. 2008. Estimating naphthenic acids concentrations in laboratory-exposed fish and in fish from the wild. *Chemosphere*. 73(4):498–505. doi:10.1016/j.chemosphere.2008.06.040.

## Traditional resources and cultural practices

---

Adamache, Lori, Spink, David. 2012. Cumulative Effects: Concerns of Fort McKay regarding the impacts of emissions to air from industrial development. Prepared for the Fort McKay Sustainability Department. September 2012.

Baker, Janelle. 2016. Research as reciprocity: Northern Cree community-based and community-engaged research on wild food contamination in Alberta's Oil Sands region. *Engaging with Indigenous Communities* (2):1.

Brunet, Nicolas D., Jardine, Timothy D., Jones, Paul D., Macdermid, Findlay, Reed, Graeme, Bogdan, Ana-Maria, Tchir, Devan R., Natcher, David C. 2020. Towards Indigenous community-led monitoring of fish in the oil sands region of Canada: Lessons at the intersection of cultural consensus and fish science. *The Extractive Industries and Society*. <https://doi.org/10.1016/j.exis.2020.06.014>

Candler, C., Olson, R., DeRoy, S., Athabasca Chipewyan First Nation and Mikisew Cree Nation. 2010. *As long as the rivers flow: Athabasca River knowledge, use and change*. Edmonton, Alberta: Park Institute.

Candler, Craig, Gibson, Ginger, Mikisew Cree First Nation. 2015. *Wîyôw'tam'kitaskino (Our Land is Rich): A Mikisew Cree culture & rights assessment for the proposed Teck Frontier project update*. Prepared for Mikisew Cree First Nation.

Carver, M., MacLean, B. 2016. Community-based water-depth monitoring in the Peace-Athabasca Delta: Insights and evaluation. Prepared for Athabasca Chipewyan First Nation and Mikisew Cree First Nation.

Gould, Lorne. 2012. *Fort McKay First Nation models and data: What are they saying about cumulative effects on wildlife species important to the community of Fort McKay*. Gould Environmental Ltd.

Government of Canada. 2019. Video series: Wildlife science in the Oil Sands region. [Accessed 2019 June 04]. Available from: <https://www.canada.ca/en/environment-climate-change/services/oil-sands-monitoring/video-wildlife-science-oil-sands.html>

Hopkins, Debra, Joly, Tara L., Sykes, Harvey, Waniandy, Almer, John, Grant, Lorrie, Gallagher, Hansen, Leonard, Wall, Kaitlyn, Fortna, Peter, Bailey, Michelle. 2019. "Learning together": Braiding Indigenous and western knowledge systems to understand freshwater mussel health in the lower Athabasca region of Alberta, Canada.

Independent Environmental Consultants (IEC). 2018. Milestone 2: Draft Report. Strategic Environmental Assessment of Wood Buffalo National Park World Heritage Site.

Lawe, L.B., Wells, J., Mikisew Cree First Nation. 2005. Cumulative effects assessment and EIA follow-up: a proposed community-based monitoring program in the Oil Sands region, northeastern Alberta. *Impact Assessment and Project Proposal*. (23):3:205-209.

MCFN (Mikisew Cree First Nation). 2015. Community-based monitoring program. Polycyclic aromatic hydrocarbons (PAH) levels in the Lower Athabasca River and Peace Athabasca Delta.

MCFN (Mikisew Cree First Nation). 2016. Written brief of the Mikisew Cree First Nation to the Standing on Environment & Sustainable Development. [Accessed 2016 May 7]. House of Commons Canada, November 15, 2016. Available from: [www.ourcommons.ca](http://www.ourcommons.ca).

Parlee, B., Geertsema, K. & Willier, A. 2012. Social-Ecological Thresholds in a Changing Boreal Landscape: Insights from Cree Knowledge of the Lesser Slave Lake Region of Alberta, Canada. *Ecology & Society* 17(2):20.

Straka, Jason R., Gray, Queenie Z. 2018 “We used to say rats fell from the sky after a flood”: Temporary recovery of muskrat following ice-jams in the Peace-Athabasca Delta. *Arctic*. (71):2: 218-228.

Timoney KP, Lee P. 2009. Does the Alberta Tar Sands Industry Pollute? The Scientific Evidence. *Open Conserv Biol J*. 3(1):65–81. doi:10.2174/1874839200903010065.

UNESCO (United Nations Educational, Scientific and Cultural Organization). 2017. World Heritage Centre. International Union for Conservation. Mission Report. Reactive Monitoring Mission to Wood Buffalo National Park, Canada [Mission Report].

WBEA, 2014. Fort McKay Berry Focus Group Video. Available: <https://www.youtube.com/watch?v=F5pl6uPHJPc&t=657s>

Zurawell, Ron, Adams, Rebekah, Emmerton, Craig. 2019. Wabasca Lake monitoring project results report. Government of Alberta, Ministry of Environment and Parks. [Accessed 2019 March 25]. Available from: <https://open.alberta.ca/publications/north-wabasca-lake-monitoring-project>
